# Supplementary material
Source: PubMed Central journal article supplement (PMC4070821)
Supplement: PulmCirc-003-926.s001.pdf [file PulmCirc-003-926.s001.pdf]

**Kojonazarov, PPAR $\beta$ / $\delta$  agonist protects the right heart – Supplemental material**

**SUPPLEMENTAL TABLES**

**Supplemental Table S1. Top bio functions in sham operated C57BL/6 mice treated with GW0742**

| <b>Disease and Disorders</b>                          | <b>No of Molecules</b> | <b><i>p</i>-value</b>                        |
|-------------------------------------------------------|------------------------|----------------------------------------------|
| Cancer                                                | 7                      | 3.03x10 <sup>-3</sup> -4.96x10 <sup>-2</sup> |
| Gastrointestinal Disease                              | 8                      | 3.03x10 <sup>-3</sup> -4.96x10 <sup>-2</sup> |
| Dermatological Disease and conditions                 | 5                      | 5.71x10 <sup>-3</sup> -4.96x10 <sup>-2</sup> |
| Genetic Disorder                                      | 7                      | 8.23x10 <sup>-3</sup> -3.48x10 <sup>-2</sup> |
| Neurological Disease                                  | 2                      | 8.23x10 <sup>-3</sup> -8.23x10 <sup>-3</sup> |
| <b>Molecular and Cellular Functions</b>               |                        | <b><i>p</i>-value</b>                        |
| Cell Cycle                                            | 2                      | 1.08x10 <sup>-3</sup> -4.54x10 <sup>-2</sup> |
| DNA Replication, Recombination and Repair             | 3                      | 1.08x10 <sup>-3</sup> -4.54x10 <sup>-2</sup> |
| Gene Expression                                       | 6                      | 3.03x10 <sup>-3</sup> -4.54x10 <sup>-2</sup> |
| Molecular Transport                                   | 2                      | 4.31x10 <sup>-3</sup> -3.48x10 <sup>-2</sup> |
| Small Molecule Biochemistry                           | 4                      | 8.23x10 <sup>-3</sup> -8.23x10 <sup>-3</sup> |
| <b>Physiological Systems Development and Function</b> |                        | <b><i>p</i>-value</b>                        |
| Connective Tissue and Development and Function        | 2                      | 5.38x10 <sup>-3</sup> -1.82x10 <sup>-2</sup> |
| Hair and Skin Development and Function                | 2                      | 5.38x10 <sup>-3</sup> -1.29x10 <sup>-2</sup> |
| Reproductive System Development and Function          | 1                      | 7.53x10 <sup>-3</sup> -7.53x10 <sup>-3</sup> |
| Skeletal and Muscular System Development and Function | 1                      | 7.53x10 <sup>-3</sup> -7.53x10 <sup>-3</sup> |
| Embryonic Development                                 | 1                      | 1.18x10 <sup>-2</sup> -1.18x10 <sup>-2</sup> |

Table shows the top bio functions identified from genes differentially expressed in C57BL/6 mice that have been sham operated and treated with GW0742. Animals underwent a sham operation and after several days animals were orally dosed with vehicle or GW0742 (30 mg/kg) and after 14 days the right ventricle was excised and RNA extracted from each sample. Gene

expression was measured using the Illumina MouseRef-6v2 BeadChip array and data analysed using the syntax package *R* (version 2.3.1) with “Bioconductor” and “limma”. Genes that were significantly modified, as calculated using a moderated *t*-test followed by Benjamini-Hochberg false discovery rate correction, were imported into Ingenuity Pathway Analysis software. The range of p-values is reflective of the range of molecules that are represented in each network.

**Supplemental Table S2. Top canonical pathways in in sham operated C57BL/6 mice treated with GW0742.**

| Canonical Pathways                     | Molecules in Network | p-value               | Ratio        |
|----------------------------------------|----------------------|-----------------------|--------------|
| Cell Cycle: G1/S Checkpoint Regulation | CDK2, HDAC4          | 1.52x10 <sup>-3</sup> | 2/59 (0.03)  |
| Ubiquinone Biosynthesis                | MAP2K3, RORA         | 2.54x10 <sup>-3</sup> | 2/71 (0.03)  |
| Inositol Metabolism                    | CDK2, HDAC4          | 3.06x10 <sup>-3</sup> | 2/87 (0.02)  |
| Mitochondrial Dysfunction              | CDK2, MAP2K3         | 4.90x10 <sup>-3</sup> | 2/98 (0.02)  |
| Oxidative Phosphorylation              | MAP2K3, PPAT         | 8.60x10 <sup>-3</sup> | 2/141 (0.01) |

Table shows the top canonical pathways identified from genes significantly elevated in sham operated C57BL/6 mice that have been treated with GW0742 (30 mg/kg). Animals underwent a sham operation and after several days animals were orally dosed with vehicle or GW0742 (30 mg/kg). After 14 days the right ventricle was excised and RNA extracted from each sample. Gene expression was measured using the Illumina MouseRef-6v2 BeadChip array and data analysed using the syntax package *R* (version 2.3.1) with “Bioconductor” and “limma”. Genes that were significantly modified using a moderated *t*-test followed by Benjamini-Hochberg false discovery rate correction were imported into Ingenuity Pathway Analysis software. The P-value for association of genes and the described canonical pathways, and the ratio of significantly differentially expressed pathway components compared to the total components in that pathway was generated using Fisher’s exact test.

**Supplemental Table S3. Top bio functions in pulmonary artery banded C57BL/6 mice treated with 30 mg/kg GW0742.**

| <b>Disease and Disorders</b>                          | <b>No of Molecules</b> | <b>p-value</b>                                |
|-------------------------------------------------------|------------------------|-----------------------------------------------|
| Cardiovascular Disease                                | 5                      | $1.73 \times 10^{-3}$ - $4.42 \times 10^{-2}$ |
| Development Disorder                                  | 4                      | $1.73 \times 10^{-3}$ - $3.46 \times 10^{-3}$ |
| Genetic Disorder                                      | 10                     | $1.73 \times 10^{-3}$ - $4.07 \times 10^{-2}$ |
| Haematological Disease                                | 3                      | $1.73 \times 10^{-3}$ - $4.73 \times 10^{-2}$ |
| Connective Tissue Disease                             | 2                      | $1.73 \times 10^{-3}$ - $2.23 \times 10^{-2}$ |
| <b>Molecular and Cellular Functions</b>               | <b>No of Molecules</b> | <b>p-value</b>                                |
| Carbohydrate Metabolism                               | 4                      | $2.88 \times 10^{-5}$ - $4.73 \times 10^{-2}$ |
| Molecular Transport                                   | 8                      | $2.88 \times 10^{-5}$ - $4.07 \times 10^{-2}$ |
| Small Molecule Biochemistry                           | 7                      | $2.88 \times 10^{-5}$ - $4.07 \times 10^{-2}$ |
| Amino Acid Metabolism                                 | 2                      | $1.73 \times 10^{-3}$ - $1.55 \times 10^{-2}$ |
| Cellular Assembly and Organisation                    | 8                      | $1.73 \times 10^{-3}$ - $2.23 \times 10^{-2}$ |
| <b>Physiological Systems Development and Function</b> | <b>No of Molecules</b> | <b>p-value</b>                                |
| Organismal Development                                | 5                      | $2.89 \times 10^{-6}$ - $4.07 \times 10^{-2}$ |
| Cardiovascular System Development and Function        | 4                      | $1.73 \times 10^{-3}$ - $4.85 \times 10^{-2}$ |
| Connective Tissue Development and Function            | 3                      | $1.73 \times 10^{-3}$ - $5.18 \times 10^{-3}$ |
| Embryonic Development                                 | 1                      | $1.73 \times 10^{-3}$ - $1.73 \times 10^{-3}$ |
| Haematological System Development and Function        | 2                      | $1.73 \times 10^{-3}$ - $4.13 \times 10^{-2}$ |

Table shows the top bio functions identified from genes significantly expressed in pulmonary artery banded C57BL/6 mice treated with GW0742 compared with vehicle controls. Animal's pulmonary arteries were occluded and after several days animals were orally dosed with vehicle or GW0742 (30 mg/kg). After 14 days the right ventricle was excised and RNA extracted from each sample. Gene expression was measured using the Illumina MouseRef-6v2 BeadChip array

and data analysed using the syntax package *R* (version 2.3.1) with “Bioconductor” and “limma”. Genes that were significantly modified as calculated using a moderated *t*-test followed by Benjamini-Hochberg false discovery rate correction were imported into Ingenuity Pathway Analysis software. The range of p-values is reflective of the range of molecules that are represented in each network.

**Supplemental Table S4. Top canonical pathways in pulmonary artery banded C57BL/6 mice treated with 30 mg/kg GW0742.**

| Canonical Pathways               | Molecules in Network           | p-value               | Ratio        |
|----------------------------------|--------------------------------|-----------------------|--------------|
| <b>Pyruvate Metabolism</b>       | LDHD, MDH2 (includes EG:17448) | 5.62x10 <sup>-3</sup> | 2/65 (0.03)  |
| <b>Ubiquinone Biosynthesis</b>   | NDUFB10, NDUFV3                | 5.79x10 <sup>-3</sup> | 2/66 (0.03)  |
| <b>Inositol Metabolism</b>       | ALDOA                          | 8.62x10 <sup>-3</sup> | 1/5 (0.2)    |
| <b>Mitochondrial Dysfunction</b> | NDUFB10, NDUFV3                | 2.24x10 <sup>-2</sup> | 2/136(0.02)  |
| <b>Oxidative Phosphorylation</b> | NDUFB10, NDUFV3                | 2.33x10 <sup>-2</sup> | 2/137 (0.02) |

Table shows the top canonical pathways from genes significantly elevated in C57BL/6 mice that have been pulmonary artery banded and treated with GW0742 (30 mg/kg). Animal's pulmonary arteries were occluded and after several days animals were orally dosed with vehicle or GW0742 (30 mg/kg). After 14 days the right ventricle was excised and RNA extracted from each sample. Gene expression was measured using the Illumina MouseRef-6v2 BeadChip array and data analysed using the syntax package *R* (version 2.3.1) with "Bioconductor" and "limma". Genes that were significantly modified using a moderated *t*-test followed by Benjamini-Hochberg false discovery rate correction, were imported into Ingenuity Pathway Analysis software. The P-value for association of genes and the described canonical pathways, and the ratio of significantly differentially expressed pathway components compared to the total components in that pathway was generated using Fisher's exact test.

**Kojonazarov, PPAR $\beta$ / $\delta$  agonist protects the right heart – Supplemental material**

**SUPPLEMENTAL TABLES**

**Supplemental table S5. Transcripts altered  $\geq 1.5$  fold in sham-operated C57BL/6 mice treated with GW0742.**

| <b>Symbol</b> | <b>Probe ID</b> | <b>Accession No</b> | <b>FC</b> | <b>p value</b> |
|---------------|-----------------|---------------------|-----------|----------------|
| Nppb          | ILMN_2726837    | NM_010118.1         | 4191.85   | 2.75E-08       |
| Acta1         | ILMN_2738825    | NM_133753.1         | 1984.64   | 6.63E-09       |
| Ptgds         | ILMN_1248316    | NM_020581.1         | 161.86    | 3.46E-08       |
| Myh7          | ILMN_2945491    | NM_007913.5         | 139.96    | 1.94E-02       |
| Ankrd23       | ILMN_2741117    | NM_001037493.1      | 117.16    | 3.90E-08       |
| S100a8        | ILMN_2710905    | NM_010234.2         | 90.76     | 2.42E-02       |
| Egr2          | ILMN_2623983    | NM_008416.1         | 82.44     | 5.07E-06       |
| Ankrd1        | ILMN_2625451    | NM_010516.1         | 81.45     | 2.43E-06       |
| Tnfrsf12a     | ILMN_2424299    | NM_010516.1         | 66.45     | 1.25E-06       |
| Bdh1          | ILMN_1231553    | NM_008036.2         | 46.15     | 3.58E-07       |
| Meox1         | ILMN_1213886    | NM_030612.2         | 37.88     | 1.96E-06       |
| Spon2         | ILMN_1229547    | NM_007715.5         | 30.91     | 1.71E-02       |
| Gdf15         | ILMN_2735350    | NM_001037493.1      | 25.70     | 8.79E-05       |
| Ankrd1        | ILMN_2950286    | NM_011756.4         | 22.38     | 2.75E-08       |
| Timp1         | ILMN_3103896    | NM_144903.2         | 21.74     | 6.77E-05       |
| Timp1         | ILMN_2769918    | NM_172520.2         | 18.10     | 3.80E-04       |
| Mfap5         | ILMN_1225835    | NM_001039522.1      | 18.01     | 8.51E-03       |
| Rcan1         | ILMN_1259180    | NM_010321.1         | 17.48     | 3.57E-03       |
| Dscr1         | ILMN_2701991    | NM_001033437.1      | 15.91     | 3.69E-05       |
| Mmp14         | ILMN_1240726    | NM_007393.3         | 14.20     | 4.78E-06       |
| Errfi1        | ILMN_2714031    | NM_145999.2         | 13.38     | 8.35E-04       |

|              |              |                |       |          |
|--------------|--------------|----------------|-------|----------|
| Fbn1         | ILMN_1223552 | NM_001042541.1 | 13.32 | 3.75E-04 |
| Fcgr4        | ILMN_2631161 | NM_001081244.1 | 12.64 | 5.27E-03 |
| Gck          | ILMN_2698004 | NM_013807.1    | 12.19 | 1.44E-04 |
| Itgb11       | ILMN_2636424 | NM_001013365.1 | 11.89 | 2.74E-03 |
| Mybpc2       | ILMN_2676012 | NM_008800.1    | 11.72 | 4.18E-06 |
| Sex          | ILMN_1226016 | NM_172904.2    | 11.54 | 4.77E-05 |
| Ppp1r3c      | ILMN_2667091 | NM_144896.4    | 11.47 | 3.91E-06 |
| Ptn          | ILMN_2638114 | NM_021880.2    | 11.21 | 9.52E-03 |
| Abra         | ILMN_2732401 | NM_008743.1    | 11.13 | 5.27E-06 |
| Egr1         | ILMN_2662926 | NM_025579.1    | 10.42 | 1.65E-05 |
| Col1a1       | ILMN_2687872 | NM_153405.2    | 10.34 | 3.53E-02 |
| LOC100045780 | ILMN_2772155 | NM_178577.3    | 10.29 | 5.08E-04 |
| Emp1         | ILMN_2642913 | NM_011337.2    | 10.20 | 9.52E-05 |
| Tubb2b       | ILMN_2588051 | NM_011671.3    | 10.01 | 6.35E-06 |
| Ehbp111      | ILMN_1227131 | NM_008838.1    | 9.51  | 6.35E-06 |
| Lgals3       | ILMN_1223317 | NM_183316.2    | 9.30  | 7.14E-04 |
| Pfkip        | ILMN_1237695 | NM_173735.2    | 9.28  | 2.27E-04 |
| Sphk1        | ILMN_1232884 | NM_011818.2    | 8.83  | 2.70E-03 |
| Lox          | ILMN_2997494 | NM_172606.2    | 8.57  | 6.88E-03 |
| Col4a2       | ILMN_2822579 | NM_008928.3    | 8.26  | 1.72E-03 |
| Tubb2b       | ILMN_1377919 | NM_007584.2    | 8.24  | 2.19E-05 |
| Fxyd6        | ILMN_2609998 | NM_024473.3    | 8.19  | 5.41E-04 |
| Fxyd5        | ILMN_2967266 | NM_027249.2    | 8.15  | 1.55E-05 |
| Nrap         | ILMN_3138732 | NM_183417.2    | 8.06  | 6.35E-06 |
| Adprhl1      | ILMN_1247158 | NM_178656.2    | 8.04  | 2.97E-07 |
| Col4a1       | ILMN_2621643 | NM_152808.2    | 7.87  | 9.65E-04 |
| Adprhl1      | ILMN_2786973 | XM_001002886.2 | 7.84  | 3.16E-07 |
| Uck2         | ILMN_2880536 | NM_013646.1    | 7.76  | 4.99E-04 |



|               |              |                |      |          |
|---------------|--------------|----------------|------|----------|
| Lman11        | ILMN_3127595 | NM_001005423.1 | 7.68 | 8.14E-05 |
| Upp1          | ILMN_2959291 | NM_207225.1    | 7.63 | 9.68E-06 |
| Col6a1        | ILMN_2768087 | NM_026384.3    | 7.55 | 1.59E-02 |
| Cyr61         | ILMN_2794645 | NM_175930.4    | 7.41 | 8.42E-04 |
| Adprh1        | ILMN_1257998 | NM_027722.2    | 7.28 | 6.22E-04 |
| Unc5b         | ILMN_2523316 | NM_172874.2    | 7.08 | 2.01E-06 |
| Pi16          | ILMN_2669062 | NM_001042671.1 | 7.07 | 1.66E-03 |
| Hspa11        | ILMN_2654682 | NR_002858.1    | 6.96 | 9.52E-05 |
| Nedd9         | ILMN_2654186 | NM_001042672.1 | 6.79 | 3.23E-05 |
| Svep1         | ILMN_2691951 | NM_001039710.1 | 6.77 | 5.28E-03 |
| LOC641240     | ILMN_2607675 | NM_144544.1    | 6.76 | 4.25E-03 |
| Nfkbiz        | ILMN_2755008 |                | 6.75 | 3.92E-04 |
| Wisp2         | ILMN_2486906 |                | 6.74 | 2.20E-02 |
| Cdkn1a        | ILMN_2846776 | ACCESSION      | 6.73 | 2.54E-02 |
| 1110032E23Rik | ILMN_1235811 | NM_008726.3    | 6.67 | 6.89E-03 |
| H2-Ab1        | ILMN_1226525 | NM_009606.2    | 6.65 | 7.40E-03 |
| 2810405K02Rik | ILMN_1238542 | NM_008963.1    | 6.58 | 1.17E-04 |
| 2310039E09Rik | ILMN_2897214 | NM_080728.2    | 6.53 | 1.45E-06 |
| Bhlhb2        | ILMN_1249378 | NM_153502.3    | 6.53 | 3.83E-03 |
| Ctgf          | ILMN_2909150 | NM_013650.2    | 6.53 | 7.90E-03 |
| H2-Eb1        | ILMN_1239102 | NM_010118.1    | 6.49 | 4.50E-03 |
| Eln           | ILMN_2697304 | NM_013468.3    | 6.45 | 1.07E-02 |
| Cyr61         | ILMN_2710253 | NM_013749.1    | 6.35 | 8.29E-04 |
| Mmp2          | ILMN_2678218 | NM_175177.3    | 6.29 | 1.42E-02 |
| Nedd9         | ILMN_1223678 | NM_010791.3    | 6.28 | 2.06E-04 |
| Twf2          | ILMN_1234388 | NM_133903.2    | 6.26 | 7.28E-05 |
| Synpo2l       | ILMN_1214563 | NM_011819.1    | 6.18 | 2.72E-03 |
| LOC100048556  | ILMN_2771766 | NM_013468.2    | 6.14 | 1.60E-03 |

|               |              |                |      |          |
|---------------|--------------|----------------|------|----------|
| Rbp7          | ILMN_2733708 | NM_011593.2    | 6.13 | 5.68E-04 |
| Hn1           | ILMN_2758452 | NM_011593      | 6.11 | 5.75E-05 |
| Nav1          | ILMN_2647873 | NM_015776.2    | 6.09 | 2.30E-05 |
| Serpinf1      | ILMN_2639239 | NM_019466.3    | 6.07 | 6.99E-03 |
| Lox11         | ILMN_1255871 | NM_019466.2    | 6.01 | 3.33E-04 |
| Rrp12         | ILMN_2728118 | NM_008608.2    | 5.96 | 8.37E-07 |
| Esm1          | ILMN_1257574 | NM_133753.1    | 5.91 | 3.51E-04 |
| Fos           | ILMN_2750515 | NM_007993      | 5.86 | 5.90E-03 |
| 2410004L22Rik | ILMN_2749747 | NM_144559.1    | 5.58 | 3.73E-05 |
| H2-Ab1        | ILMN_2913716 | NM_010292.4    | 5.48 | 6.31E-03 |
| Nupr1         | ILMN_2742042 | NM_145467.1    | 5.48 | 7.28E-03 |
| Uck2          | ILMN_1242013 | NM_178067.3    | 5.46 | 6.96E-04 |
| Junb          | ILMN_1220034 | NM_198885.2    | 5.44 | 1.28E-03 |
| Fstl4         | ILMN_2655058 | NM_016854.2    | 5.43 | 1.29E-05 |
| Vat1          | ILMN_2440530 | NM_008973.2    | 5.43 | 1.31E-03 |
| Fxyd5         | ILMN_1235493 | NM_175456.4    | 5.30 | 3.33E-04 |
| LOC100041504  | ILMN_2602139 | NM_007913.5    | 5.29 | 1.56E-02 |
| Actb          | ILMN_2698799 | NM_007742.2    | 5.26 | 2.93E-05 |
| Nav1          | ILMN_2883016 | XM_001475019.1 | 5.19 | 3.78E-05 |
| H2-Ab1        | ILMN_2631423 | NM_010128.4    | 5.04 | 1.07E-02 |
| Spsb4         | ILMN_1243507 | NM_023716.1    | 4.97 | 1.10E-03 |
| Cldn5         | ILMN_1241293 | NM_053252.2    | 4.96 | 7.11E-03 |
| E430002G05Rik | ILMN_2870864 | NM_010705.2    | 4.87 | 3.22E-02 |
| Mybpc3        | ILMN_2689136 | NM_019703.3    | 4.85 | 1.18E-05 |
| Tnc           | ILMN_2463181 | NM_011451.2    | 4.84 | 3.44E-03 |
| Srpx2         | ILMN_2698728 | NM_010728.1    | 4.83 | 1.92E-03 |
| Cd93          | ILMN_1226829 | NM_009932.2    | 4.83 | 5.45E-03 |
| Ctsk          | ILMN_2711163 | NM_023716.2    | 4.81 | 1.12E-02 |

|               |              |             |      |          |
|---------------|--------------|-------------|------|----------|
| Nrap          | ILMN_1235070 | NM_022004.6 | 4.76 | 7.04E-06 |
| Rnf144a       | ILMN_2678127 | NM_008761.2 | 4.70 | 6.61E-05 |
| Ets1          | ILMN_3157483 | NM_008733.3 | 4.69 | 2.58E-05 |
| Elk3          | ILMN_3119014 | NM_172750.3 | 4.68 | 1.29E-05 |
| Ccnd2         | ILMN_2700166 | NM_009931.1 | 4.68 | 3.06E-04 |
| Tuba6         | ILMN_2476139 | NM_172750.1 | 4.64 | 1.68E-04 |
| Stk40         | ILMN_2793844 | NM_030724.1 | 4.62 | 1.40E-04 |
| Rab11fip5     | ILMN_1216781 | NM_199222.1 | 4.62 | 6.35E-06 |
| Pdlim7        | ILMN_2430813 | NM_009477.1 | 4.61 | 6.97E-04 |
| Cox19         | ILMN_1221936 | NM_009933.2 | 4.61 | 8.37E-07 |
| C230093N12Rik | ILMN_1225348 | NM_010516.1 | 4.55 | 1.08E-03 |
| 2010111I01Rik | ILMN_2838372 | NM_172750.3 | 4.52 | 2.53E-03 |
| Anxa5         | ILMN_2680142 | NM_029770.2 | 4.46 | 7.72E-06 |
| Col16a1       | ILMN_1248099 | NM_023734.3 | 4.45 | 1.40E-02 |
| AA407659      | ILMN_2876010 | NM_013558.1 | 4.44 | 1.04E-03 |
| Enpp1         | ILMN_2782964 | NM_017464.2 | 4.41 | 7.91E-03 |
| Litaf         | ILMN_2665490 | NM_022814.2 | 4.39 | 1.29E-03 |
| Ddah1         | ILMN_1256676 | XM_918601.3 | 4.30 | 5.39E-03 |
| Ch25h         | ILMN_2702303 | NM_030612.2 | 4.29 | 1.17E-03 |
| Adamtsl2      | ILMN_2650115 | NM_016873.1 | 4.28 | 3.13E-02 |
| Cd74          | ILMN_3089584 | NM_007669.2 | 4.26 | 2.02E-02 |
| Tspan17       | ILMN_2817714 | NM_133187.2 | 4.26 | 2.79E-05 |
| D630042P16Rik | ILMN_2894604 | NM_207105.2 | 4.26 | 2.96E-05 |
| B2m           | ILMN_1216746 | NM_025582.3 | 4.23 | 1.57E-02 |
| Arntl         | ILMN_2707510 | NM_026509.1 | 4.22 | 3.58E-02 |
| Ms4a7         | ILMN_3091003 | NM_011498.4 | 4.21 | 2.00E-04 |
| Nuak1         | ILMN_1227458 | NM_010217.1 | 4.21 | 8.52E-04 |
| Plekho2       | ILMN_2749448 | NM_010382.2 | 4.17 | 2.34E-03 |

|               |              |                |      |          |
|---------------|--------------|----------------|------|----------|
| 2900073G15Rik | ILMN_2682046 | NM_007925.3    | 4.16 | 1.47E-04 |
| Adamts2       | ILMN_2729103 | NM_010516.1    | 4.16 | 4.25E-02 |
| Sema3f        | ILMN_1248740 | NM_008610.2    | 4.13 | 2.38E-03 |
| Kctd12b       | ILMN_2945560 | NM_017464.2    | 4.12 | 3.59E-03 |
| Phlda1        | ILMN_2754985 | NM_011876.3    | 4.11 | 1.11E-02 |
| Fmnl3         | ILMN_2599657 | NM_175132.3    | 4.06 | 4.16E-05 |
| Mapt          | ILMN_2740020 | XM_001480891.1 | 4.04 | 1.21E-05 |
| Fmnl3         | ILMN_2599659 | NM_022020.2    | 4.04 | 1.34E-04 |
| Icam1         | ILMN_2896601 | NM_008258.1    | 4.01 | 4.48E-03 |
| Clcnkb        | ILMN_2757283 | NM_173437.1    | 4.01 | 1.48E-04 |
| Prkar1a       | ILMN_1235481 | NM_011340.3    | 3.98 | 4.64E-07 |
| 6330406I15Rik | ILMN_2642517 | NM_010729.2    | 3.97 | 2.52E-03 |
| Clip1         | ILMN_1238497 | NM_199447.2    | 3.96 | 6.79E-04 |
| Fhl1          | ILMN_2713285 | NM_023612.3    | 3.94 | 2.20E-03 |
| Coro1a        | ILMN_2714796 | NM_010234.2    | 3.94 | 1.35E-03 |
| Tgfb3         | ILMN_2748966 | NM_029621.2    | 3.90 | 5.82E-03 |
| Slmap         | ILMN_1224516 | NM_207105.1    | 3.89 | 2.00E-04 |
| Cd74          | ILMN_1221817 | NM_019738.1    | 3.83 | 3.91E-02 |
| Lmna          | ILMN_2662387 | NM_030724.3    | 3.82 | 9.21E-04 |
| Clic5         | ILMN_2677634 | NM_008416.1    | 3.81 | 8.79E-05 |
| Rab11fip5     | ILMN_3139693 | NM_177059.3    | 3.81 | 5.02E-05 |
| Rasgrp3       | ILMN_2908687 | NM_012037.2    | 3.80 | 5.09E-05 |
| Gngt2         | ILMN_1246056 | NM_008761.2    | 3.79 | 5.30E-05 |
| Podxl         | ILMN_2604494 | XM_001473258.1 | 3.78 | 5.73E-03 |
| Pfkfb2        | ILMN_1253966 | NM_007393.3    | 3.77 | 7.90E-03 |
| Rasl11b       | ILMN_2793062 | NM_173437.1    | 3.76 | 1.24E-02 |
| Pdgfb         | ILMN_2618714 | NM_207105.2    | 3.74 | 5.42E-04 |
| Pdzd3         | ILMN_1258691 | NM_145134.2    | 3.74 | 2.61E-04 |

|               |              |                |      |          |
|---------------|--------------|----------------|------|----------|
| Rhoc          | ILMN_2790097 | NM_013805.3    | 3.72 | 2.68E-02 |
| Ednrb         | ILMN_2589640 | NM_173749.3    | 3.71 | 1.18E-04 |
| 4922503N01Rik | ILMN_2939503 | NM_008653.2    | 3.70 | 1.80E-05 |
| Cd52          | ILMN_2910934 | NM_011607.2    | 3.69 | 8.64E-03 |
| Rapgef1       | ILMN_3140516 | NM_001083895.1 | 3.69 | 1.80E-05 |
| Tmem53        | ILMN_2859917 | NM_010740.3    | 3.68 | 3.59E-04 |
| Upp1          | ILMN_2959292 | NM_007802.3    | 3.68 | 1.35E-04 |
| D230007K08Rik | ILMN_1217913 | NM_198059.2    | 3.68 | 2.87E-04 |
| Higd1b        | ILMN_2852925 | NM_080563.3    | 3.68 | 1.61E-03 |
| Arpc1b        | ILMN_1227836 | NM_001038642.1 | 3.66 | 9.77E-04 |
| Slc15a3       | ILMN_2987709 | NM_205536.1    | 3.64 | 4.94E-04 |
| Cygb          | ILMN_2801891 | NM_009829.3    | 3.63 | 1.94E-02 |
| Slc12a7       | ILMN_2650953 | XM_147357.1    | 3.63 | 1.97E-03 |
| Hlx           | ILMN_2637757 | NM_028800.2    | 3.62 | 9.03E-03 |
| LOC100048556  | ILMN_3161805 | NM_001003955.2 | 3.61 | 1.87E-02 |
| Mapt          | ILMN_1257750 | NM_026131      | 3.61 | 4.07E-04 |
| Fxyd5         | ILMN_2742928 | NM_197980.1    | 3.59 | 1.15E-04 |
| Psmbl10       | ILMN_2914843 | NM_153560.4    | 3.58 | 1.77E-03 |
| Lmna          | ILMN_3121891 | NM_028079.1    | 3.58 | 1.18E-04 |
| Abi3          | ILMN_1223041 | NM_009673.1    | 3.57 | 1.17E-03 |
| Unc119b       | ILMN_1245813 | NM_028266.4    | 3.57 | 7.37E-04 |
| LOC626578     | ILMN_2808485 | NM_175352.2    | 3.57 | 1.98E-02 |
| LOC100046608  | ILMN_1249366 | NM_008813.2    | 3.57 | 6.29E-03 |
| Rsad2         | ILMN_1225204 | NM_019980.1    | 3.57 | 5.67E-03 |
| Clip1         | ILMN_2920759 | NM_026993      | 3.56 | 6.57E-04 |
| Cd63          | ILMN_2653617 | NM_009890.1    | 3.55 | 3.50E-05 |
| Srpx          | ILMN_2629486 | NM_029981.1    | 3.54 | 5.54E-03 |
| Klhl34        | ILMN_1242984 | NM_010545.3    | 3.52 | 5.20E-03 |

|               |              |                |      |          |
|---------------|--------------|----------------|------|----------|
| Dpysl3        | ILMN_1250075 | NM_028841.1    | 3.50 | 3.54E-03 |
| Vegfa         | ILMN_2484527 | NM_175525.2    | 3.49 | 2.35E-02 |
| EG625054      | ILMN_2998173 | NM_009735.2    | 3.48 | 3.96E-04 |
| Rras2         | ILMN_2909782 | NM_007489.3    | 3.48 | 7.19E-05 |
| Ccbp2         | ILMN_2650557 | NM_027836.5    | 3.47 | 3.66E-04 |
| Prnp          | ILMN_2619316 | NM_001004363.1 | 3.46 | 2.63E-04 |
| Rhoj          | ILMN_2653567 | NM_153119.2    | 3.46 | 2.46E-03 |
| Coro1a        | ILMN_2787257 | NM_026064.1    | 3.44 | 9.77E-03 |
| Ugp2          | ILMN_1244631 | NM_175643.2    | 3.44 | 2.69E-03 |
| Tnc           | ILMN_2463180 | NM_011349.3    | 3.43 | 1.07E-02 |
| Srpx2         | ILMN_2818294 | NM_175429.3    | 3.43 | 5.28E-03 |
| Prmt2         | ILMN_3099751 | NM_009344.1    | 3.43 | 4.61E-06 |
| Mcam          | ILMN_2955919 | NM_011711.1    | 3.43 | 2.11E-03 |
| Notch3        | ILMN_2697380 | NM_010838.2    | 3.42 | 7.16E-04 |
| Optn          | ILMN_2676606 | NM_011711.1    | 3.42 | 5.43E-05 |
| Anxa2         | ILMN_2657175 | NM_010493.2    | 3.42 | 1.12E-03 |
| Comp          | ILMN_2869110 | NM_019701.1    | 3.41 | 4.41E-02 |
| Pcolce        | ILMN_1253741 | NM_021880.2    | 3.41 | 3.28E-02 |
| Sema3f        | ILMN_2635631 | NM_027519.1    | 3.38 | 7.18E-03 |
| Dhdds         | ILMN_2637845 | NM_019765.4    | 3.38 | 2.88E-06 |
| Upp1          | ILMN_2959293 | NM_001077361.1 | 3.35 | 2.61E-04 |
| Capg          | ILMN_2773113 | NM_009898.2    | 3.34 | 8.51E-04 |
| Slain2        | ILMN_2686270 | NM_009368.2    | 3.34 | 7.09E-04 |
| Hn1           | ILMN_2914744 | NM_032008.3    | 3.34 | 3.10E-05 |
| Vtn           | ILMN_1234111 | NM_001042605.1 | 3.33 | 9.65E-04 |
| Rap1b         | ILMN_1229741 | NM_019390.1    | 3.32 | 3.23E-04 |
| 8430408G22Rik | ILMN_2894211 | NM_172621.2    | 3.32 | 4.06E-02 |
| Wdr1          | ILMN_2460168 | NM_001003955.2 | 3.32 | 6.19E-03 |

|               |              |                |      |          |
|---------------|--------------|----------------|------|----------|
| 1700012H17Rik | ILMN_1239592 | NM_207246.2    | 3.31 | 6.15E-04 |
| Fhl1          | ILMN_3117381 | NM_001038664.2 | 3.30 | 3.72E-03 |
| F2r           | ILMN_2740852 | NM_013723.2    | 3.29 | 1.55E-03 |
| Phlda3        | ILMN_2628567 | NM_008825.3    | 3.29 | 1.47E-02 |
| Olfml3        | ILMN_1233455 | NM_026878.1    | 3.28 | 2.34E-03 |
| Rab31         | ILMN_2665008 | NM_011057.2    | 3.28 | 2.87E-04 |
| Psmbl10       | ILMN_2757870 | NM_133226.2    | 3.27 | 2.05E-03 |
| Adcy4         | ILMN_1250417 | NM_007484.1    | 3.27 | 5.02E-05 |
| Lhfp12        | ILMN_2721357 | NM_007904.3    | 3.27 | 1.74E-03 |
| Pea15         | ILMN_2624938 | NM_153392.1    | 3.26 | 4.94E-04 |
| BC087945      | ILMN_3160842 | NM_013706.1    | 3.24 | 9.58E-04 |
| Clock         | ILMN_2610973 | NM_001039086.1 | 3.24 | 1.72E-03 |
| Lmna          | ILMN_2597710 | NM_026837.1    | 3.21 | 5.02E-05 |
| Itga11        | ILMN_2701778 | NM_009477.1    | 3.21 | 3.87E-02 |
| Carhsp1       | ILMN_1225035 | XM_980391.1    | 3.20 | 4.21E-03 |
| Tie1          | ILMN_2928560 | NM_080846.1    | 3.20 | 2.98E-02 |
| Lhfp          | ILMN_1220198 | NM_023142.1    | 3.20 | 1.55E-02 |
| Tnfrsf22      | ILMN_2454204 | NM_023044.1    | 3.17 | 1.83E-02 |
| Golga4        | ILMN_2987937 | NM_030206.1    | 3.17 | 2.34E-03 |
| Timeless      | ILMN_3097131 | NM_011390.2    | 3.17 | 5.65E-04 |
| Eng           | ILMN_1229161 | NM_008250.1    | 3.16 | 4.25E-02 |
| Prkcdbp       | ILMN_2956942 | XM_001480891.1 | 3.16 | 1.11E-02 |
| Scarf2        | ILMN_2676127 | NM_010838.3    | 3.14 | 1.13E-02 |
| Arpc1b        | ILMN_2860480 | NM_008761.2    | 3.12 | 1.58E-03 |
| Phlda3        | ILMN_2923607 | NM_013640.1    | 3.11 | 1.74E-02 |
| Slc6a8        | ILMN_2605212 | NM_001002011.1 | 3.10 | 2.52E-04 |
| Ltbp4         | ILMN_2829262 | NM_025659      | 3.10 | 3.35E-02 |
| Nuak1         | ILMN_2928720 | NM_175352.4    | 3.09 | 7.79E-04 |

|               |              |                |      |          |
|---------------|--------------|----------------|------|----------|
| Trim47        | ILMN_2504823 | NM_001039646.2 | 3.09 | 2.70E-03 |
| Ctsz          | ILMN_2839569 | XM_001476583.1 | 3.08 | 1.28E-03 |
| AA407659      | ILMN_2876015 | NM_021384.3    | 3.08 | 1.74E-02 |
| Tspo          | ILMN_2727920 | NM_019765.2    | 3.07 | 1.08E-02 |
| 2310066E14Rik | ILMN_1235324 | NM_007653.1    | 3.07 | 4.66E-03 |
| Ctnnbip1      | ILMN_1232182 | NM_016911.4    | 3.06 | 1.09E-03 |
| Cdh5          | ILMN_2866951 | NM_001081667.1 | 3.06 | 1.23E-02 |
| Adcy4         | ILMN_2847004 | NM_009468.3    | 3.05 | 6.91E-04 |
| Cdv3          | ILMN_3150963 | NM_009505.3    | 3.05 | 4.94E-04 |
| LOC100048295  | ILMN_2470646 | NR_003363.1    | 3.04 | 1.70E-02 |
| Kremen        | ILMN_1228479 | NM_025846.1    | 3.03 | 1.11E-02 |
| Grk5          | ILMN_1249435 | NM_021609.3    | 3.03 | 9.47E-04 |
| Bok           | ILMN_2772077 | NM_011170.1    | 3.03 | 6.15E-04 |
| LOC100046883  | ILMN_2679037 | NM_023275.2    | 3.03 | 3.57E-03 |
| Lasp1         | ILMN_2879746 | NM_009898.2    | 3.02 | 8.80E-04 |
| Arpc1b        | ILMN_2860479 | NM_139297.4    | 3.01 | 6.67E-04 |
| Rpl3          | ILMN_2974021 | NM_011607.1    | 3.01 | 8.40E-04 |
| Angpt2        | ILMN_1234487 | NM_026838.1    | 3.01 | 5.19E-03 |
| Picalm        | ILMN_2769656 | NM_001077638.1 | 3.01 | 1.57E-02 |
| Icam2         | ILMN_2618408 | NM_023061.1    | 3.00 | 1.49E-02 |
| Nbl1          | ILMN_2886618 | NM_008716.2    | 2.99 | 3.73E-02 |
| Doc2g         | ILMN_2781153 | NM_181848.4    | 2.99 | 2.69E-03 |
| Wdr1          | ILMN_2497268 | NM_007585.3    | 2.99 | 4.98E-04 |
| Mfge8         | ILMN_2771034 | NM_016685.1    | 2.99 | 2.91E-05 |
| Atp6v1h       | ILMN_2812935 | NM_008788.2    | 2.99 | 1.28E-04 |
| Thbd          | ILMN_1249767 | NM_011349.2    | 2.98 | 1.28E-02 |
| Mcam          | ILMN_2614531 | NM_026144.4    | 2.98 | 7.29E-04 |
| Gabarap11     | ILMN_1236958 | NM_009477.1    | 2.98 | 6.50E-03 |



|               |              |                |      |          |
|---------------|--------------|----------------|------|----------|
| LOC100046608  | ILMN_2706514 | NM_007599.3    | 2.96 | 2.24E-03 |
| 6330406I15Rik | ILMN_1213736 | NM_153567.1    | 2.96 | 5.42E-03 |
| Cd63          | ILMN_3128907 | NM_008258.1    | 2.95 | 5.09E-03 |
| Cd44          | ILMN_3114585 | NM_011707.1    | 2.95 | 2.92E-03 |
| Anxa3         | ILMN_1241171 | NM_024457.2    | 2.94 | 1.53E-04 |
| Mif           | ILMN_2867835 | NM_145980.1    | 2.94 | 1.20E-04 |
| Cx3cl1        | ILMN_2627041 | NM_011715.2    | 2.93 | 2.82E-03 |
| Tjap1         | ILMN_2656465 | NM_173426.2    | 2.93 | 1.26E-02 |
| Lmna          | ILMN_1254405 | NM_001077362.1 | 2.92 | 2.27E-04 |
| Tlr4          | ILMN_2752966 | NM_010169.3    | 2.92 | 2.65E-04 |
| Tmem204       | ILMN_3162005 | NM_013750.1    | 2.92 | 1.72E-04 |
| Syp12         | ILMN_2625299 | NM_133859.2    | 2.91 | 3.72E-04 |
| Traf3         | ILMN_2439638 | NM_133685.1    | 2.90 | 1.61E-03 |
| Eltd1         | ILMN_1224540 | NM_013640.2    | 2.90 | 5.49E-03 |
| H2-DMb1       | ILMN_1244977 | NM_080435.1    | 2.89 | 1.08E-02 |
| Fbln1         | ILMN_2870672 | NM_172589.2    | 2.89 | 2.73E-02 |
| Arhgef15      | ILMN_3094506 | NM_008556.1    | 2.89 | 1.54E-03 |
| Panx1         | ILMN_2946088 | NM_001013792.1 | 2.89 | 4.05E-04 |
| Lmna          | ILMN_1255510 | NM_007715.5    | 2.88 | 2.78E-04 |
| Cap1          | ILMN_2648661 | NM_019390.1    | 2.88 | 4.26E-03 |
| Tax1bp3       | ILMN_2746086 | NM_176922.4    | 2.88 | 2.56E-03 |
| Olfml2b       | ILMN_2745551 | NM_025821.2    | 2.86 | 4.46E-02 |
| Plcg2         | ILMN_2601833 | NM_011587.1    | 2.85 | 1.22E-04 |
| Parp14        | ILMN_2825803 | NM_175386.3    | 2.84 | 3.09E-03 |
| Traf3         | ILMN_3144289 | NM_023680      | 2.84 | 2.97E-03 |
| Trpc3         | ILMN_3001313 | NM_018748.3    | 2.84 | 1.33E-03 |
| Myh9          | ILMN_2672626 | NM_011589.1    | 2.83 | 1.27E-02 |
| Tmod3         | ILMN_2479359 | NM_007932.1    | 2.83 | 4.45E-03 |

|            |              |                |      |          |
|------------|--------------|----------------|------|----------|
| Itgb5      | ILMN_2663613 | NM_028444.1    | 2.82 | 9.95E-03 |
| Arpc5l     | ILMN_2626260 | NM_153790.2    | 2.82 | 7.57E-04 |
| Cdv3       | ILMN_2673894 | NM_023142.1    | 2.82 | 5.36E-04 |
| Csrp3      | ILMN_2789651 | NM_013750.1    | 2.82 | 3.60E-04 |
| Gpr176     | ILMN_2742912 | NM_133987.1    | 2.82 | 4.99E-04 |
| Hspb1      | ILMN_2706269 | NM_175641.1    | 2.81 | 3.14E-02 |
| Actn1      | ILMN_2844996 | NM_001004363.1 | 2.81 | 3.41E-02 |
| Cxcl16     | ILMN_2687586 | NM_172570.4    | 2.81 | 6.94E-03 |
| Zfp608     | ILMN_2939367 | NM_022325.3    | 2.81 | 1.91E-02 |
| Samd9l     | ILMN_1224855 | NM_175352.2    | 2.80 | 2.13E-03 |
| Dct        | ILMN_1251894 | NM_009775.2    | 2.80 | 7.41E-03 |
| Abcb4      | ILMN_2648742 | NM_001081241.2 | 2.78 | 8.38E-04 |
| Pdlim1     | ILMN_1234072 | NM_023465.3    | 2.78 | 5.02E-05 |
| Lxn        | ILMN_2694275 | NM_009868.3    | 2.78 | 1.93E-02 |
| St6galnac4 | ILMN_2660837 | NM_080435.1    | 2.78 | 1.51E-03 |
| Dlgap4     | ILMN_3105499 | NM_175833.1    | 2.78 | 1.58E-03 |
| Hbegf      | ILMN_2698449 | XR_034465.1    | 2.77 | 3.18E-02 |
| Rai14      | ILMN_2682928 | NM_032396      | 2.77 | 3.90E-03 |
| Ppap2a     | ILMN_2759079 | NM_018869.2    | 2.76 | 2.21E-05 |
| Galntl4    | ILMN_2736514 | NM_016778      | 2.76 | 2.35E-03 |
| Gimap6     | ILMN_1224859 | XM_001476984.1 | 2.76 | 2.69E-03 |
| Scotin     | ILMN_2651077 | NM_010688.2    | 2.75 | 7.34E-03 |
| Klhl6      | ILMN_2619528 | NM_023142.1    | 2.75 | 7.57E-04 |
| Mfge8      | ILMN_3133448 | NM_013762.1    | 2.75 | 6.94E-04 |
| Sh3rf1     | ILMN_2602597 | NM_007426.3    | 2.75 | 3.97E-05 |
| Gng8       | ILMN_1259653 | NM_146194      | 2.74 | 1.45E-02 |
| Bri3       | ILMN_2700334 | NM_010494.1    | 2.74 | 5.96E-05 |
| Ckb        | ILMN_1224754 | NM_008675.1    | 2.72 | 2.02E-02 |

|               |              |                |      |          |
|---------------|--------------|----------------|------|----------|
| Endod1        | ILMN_2733356 | NM_021791.2    | 2.72 | 1.04E-02 |
| Aqp8          | ILMN_2854157 | NM_011715.2    | 2.72 | 1.94E-03 |
| Mcam          | ILMN_1229960 | NM_008594      | 2.71 | 6.56E-03 |
| Sh3tc1        | ILMN_2847906 | NM_133826.2    | 2.71 | 2.46E-04 |
| 9130404D14Rik | ILMN_2686975 | NM_009378.2    | 2.71 | 3.92E-03 |
| Anxa3         | ILMN_3135781 | NM_023061.1    | 2.70 | 3.28E-04 |
| Tubb6         | ILMN_2718217 | NM_020590.4    | 2.69 | 1.36E-02 |
| Pam           | ILMN_2626294 | XM_001476583.1 | 2.69 | 2.69E-04 |
| BC029169      | ILMN_2840430 | NM_027519.3    | 2.69 | 1.07E-02 |
| Gnao1         | ILMN_2773191 | NM_007653.3    | 2.68 | 3.12E-02 |
| H2-Q7         | ILMN_2924419 | NM_001039150.1 | 2.68 | 3.18E-02 |
| Sh3pxd2b      | ILMN_1230423 | NM_013470.1    | 2.67 | 9.29E-03 |
| Cxcl12        | ILMN_2658908 | NM_010798.2    | 2.67 | 4.94E-04 |
| Lrp11         | ILMN_2672708 | NM_009142.3    | 2.66 | 3.24E-03 |
| Igf2r         | ILMN_2931096 | NM_028751.2    | 2.66 | 1.18E-04 |
| Pik3r3        | ILMN_1226157 | NM_019390.1    | 2.65 | 5.10E-03 |
| D16Ert472e    | ILMN_1260073 | NM_021297.2    | 2.65 | 2.56E-03 |
| Myo9b         | ILMN_2617835 | NM_001001183.1 | 2.65 | 6.88E-05 |
| Tmem49        | ILMN_2767635 | NM_008596.1    | 2.64 | 2.15E-03 |
| Rgs4          | ILMN_1244081 | NM_011632.2    | 2.64 | 2.44E-03 |
| Asph          | ILMN_1259678 | NM_133222.2    | 2.64 | 2.81E-02 |
| Prkcdbp       | ILMN_1243602 | NM_010387.2    | 2.64 | 2.96E-03 |
| Hk1           | ILMN_2644025 | NM_010180.1    | 2.64 | 1.51E-03 |
| Pcdh1         | ILMN_1260020 | NM_177566.3    | 2.63 | 4.02E-02 |
| 1110003E01Rik | ILMN_1225158 | NM_019482.2    | 2.63 | 4.74E-04 |
| Prmt2         | ILMN_1216953 | NM_019390.1    | 2.62 | 8.42E-04 |
| Mobkl2a       | ILMN_3008924 | NM_007598.2    | 2.62 | 3.48E-03 |
| Uck2          | ILMN_2880529 | NM_029564.2    | 2.61 | 1.82E-02 |

|               |              |                |      |          |
|---------------|--------------|----------------|------|----------|
| S100a13       | ILMN_2987984 | NM_177068.3    | 2.61 | 1.30E-03 |
| Lamb2         | ILMN_2699488 | NM_172285.1    | 2.60 | 1.44E-02 |
| Arhgap18      | ILMN_1248002 | NM_001039530.1 | 2.60 | 2.81E-02 |
| Lmo2          | ILMN_2767605 | NM_011632.2    | 2.60 | 2.81E-03 |
| Mllt11        | ILMN_1221429 | NM_019510.1    | 2.59 | 3.70E-03 |
| Emr1          | ILMN_1216880 | NM_022410.1    | 2.59 | 3.28E-03 |
| Hexa          | ILMN_2773624 | NM_016963.2    | 2.58 | 3.33E-04 |
| Glipr2        | ILMN_3053593 | NM_010580.1    | 2.58 | 2.46E-02 |
| 2310022B05Rik | ILMN_1257333 | NM_028809.1    | 2.56 | 2.34E-02 |
| 1300001I01Rik | ILMN_1217040 | NM_175565.3    | 2.55 | 4.70E-02 |
| Adamts15      | ILMN_2692399 | NM_013808.3    | 2.55 | 1.28E-04 |
| Fkhl18        | ILMN_2935157 | NM_201367.2    | 2.54 | 6.75E-04 |
| Akap12        | ILMN_2624622 | NM_013560.1    | 2.54 | 1.46E-02 |
| Ddah2         | ILMN_2770183 | NM_134156.1    | 2.53 | 2.23E-03 |
| Setd5         | ILMN_2743650 | NM_023158.6    | 2.53 | 1.00E-02 |
| Bcl2          | ILMN_1249021 | NM_175751.3    | 2.53 | 1.89E-03 |
| Dennd3        | ILMN_1224129 | XM_620286.3    | 2.53 | 9.21E-04 |
| Pls3          | ILMN_2764781 | NM_010024.2    | 2.52 | 1.52E-02 |
| S100a6        | ILMN_2712120 | NM_008830.1    | 2.52 | 8.57E-03 |
| BC063749      | ILMN_2995794 | NM_016861.3    | 2.51 | 7.74E-03 |
| Dbn1          | ILMN_2736005 | NM_016753.4    | 2.51 | 5.28E-03 |
| Scotin        | ILMN_2651076 | NM_011373.2    | 2.51 | 6.29E-03 |
| Klhl6         | ILMN_2840514 | NM_001042487.1 | 2.51 | 7.48E-03 |
| Rhbdf1        | ILMN_2657828 | NM_010415.1    | 2.50 | 1.07E-02 |
| Tnfrsf1a      | ILMN_1241228 | NM_030690.2    | 2.50 | 4.35E-02 |
| Asns          | ILMN_2643513 | NM_008247.2    | 2.49 | 1.66E-03 |
| Maff          | ILMN_1256996 | NM_173739.3    | 2.49 | 4.05E-04 |
| Vamp3         | ILMN_2881480 | NM_153175.3    | 2.49 | 5.00E-02 |

|              |              |                |      |          |
|--------------|--------------|----------------|------|----------|
| Tnfrsf1a     | ILMN_2469333 | NM_026381.3    | 2.49 | 2.41E-02 |
| Tmem184b     | ILMN_2697433 | NM_183390.1    | 2.49 | 1.45E-04 |
| Actn2        | ILMN_2797061 | NM_001045489.1 | 2.48 | 6.05E-05 |
| Hdac7        | ILMN_2768755 | NM_021506.2    | 2.48 | 6.32E-03 |
| Tubb5        | ILMN_1227164 | NM_010320.3    | 2.47 | 8.17E-03 |
| LOC100047200 | ILMN_1247220 | NM_018772.1    | 2.47 | 3.78E-03 |
| Ankrd37      | ILMN_2595857 | NM_021273.3    | 2.47 | 3.18E-02 |
| Alpk3        | ILMN_3001417 | NM_028013.2    | 2.46 | 7.57E-04 |
| Plekhg2      | ILMN_2738054 | NM_007474.1    | 2.46 | 2.59E-02 |
| Nkd2         | ILMN_1228631 | NM_023061.1    | 2.46 | 3.19E-02 |
| Nos3         | ILMN_2788593 | NM_194344.1    | 2.45 | 2.56E-02 |
| S100a11      | ILMN_2883392 | NM_146119.1    | 2.45 | 4.49E-02 |
| Tnip2        | ILMN_2874491 | NM_013470.1    | 2.45 | 2.85E-03 |
| Uaca         | ILMN_2492716 | NM_026473.2    | 2.45 | 2.13E-03 |
| Srpx2        | ILMN_2644515 | NM_013626.1    | 2.44 | 3.47E-02 |
| Ddit3        | ILMN_2927373 | NM_153782.1    | 2.44 | 1.34E-02 |
| BC029214     | ILMN_2768209 | NM_010308.3    | 2.43 | 3.29E-03 |
| Map3k1       | ILMN_3006611 | NM_010394.2    | 2.43 | 7.41E-03 |
| Mcc          | ILMN_2918907 | NM_177364.3    | 2.43 | 1.24E-02 |
| Eif1a        | ILMN_2698107 | NM_013655.2    | 2.43 | 1.29E-03 |
| Elovl1       | ILMN_3143506 | NM_172784.2    | 2.43 | 5.08E-04 |
| Ctsz         | ILMN_2666007 | NM_010515.1    | 2.42 | 7.28E-03 |
| Slc9a3r2     | ILMN_2710274 | NM_181585.5    | 2.42 | 5.06E-03 |
| Atf4         | ILMN_2642681 | NM_025967.2    | 2.42 | 1.02E-02 |
| Cyr61        | ILMN_1235571 | NM_015742.2    | 2.42 | 4.28E-02 |
| Cdc42bpb     | ILMN_2867696 | NM_029478.3    | 2.42 | 1.69E-02 |
| Wipfl        | ILMN_1257209 | NM_009062.3    | 2.41 | 6.31E-03 |
| Plekha4      | ILMN_1243826 | NM_133723.2    | 2.41 | 1.75E-02 |

|         |              |                |      |          |
|---------|--------------|----------------|------|----------|
| Irf1    | ILMN_2649068 | NM_028444.1    | 2.41 | 9.40E-03 |
| Rapgef3 | ILMN_1256335 | NM_010438.2    | 2.41 | 1.55E-03 |
| Gbp6    | ILMN_2860645 | NM_029357.3    | 2.41 | 4.89E-02 |
| Arfgap3 | ILMN_2648618 | NM_133697.3    | 2.40 | 1.78E-04 |
| Optn    | ILMN_2907370 | NM_001077638.1 | 2.39 | 5.28E-04 |
| Sergef  | ILMN_1249444 | NM_172457.2    | 2.39 | 3.31E-04 |
| Snx10   | ILMN_2609614 | NM_030724.1    | 2.39 | 3.92E-04 |
| Ankrd10 | ILMN_2624749 | NM_009113.3    | 2.39 | 3.59E-02 |
| Ccdc68  | ILMN_2929572 | NM_008483.2    | 2.38 | 1.24E-04 |
| Tmbim1  | ILMN_2908056 | NM_176837.2    | 2.38 | 2.18E-02 |
| Pde1b   | ILMN_1224034 | NM_008505.3    | 2.38 | 3.23E-04 |
| Plekhg2 | ILMN_2987027 | NM_019914.3    | 2.38 | 1.19E-02 |
| Rsn     | ILMN_2473620 | NM_010130.3    | 2.37 | 1.59E-02 |
| Pip4k2a | ILMN_2717439 | NM_010421.4    | 2.37 | 3.78E-03 |
| Zfp361l | ILMN_2780424 | NM_027450.3    | 2.37 | 3.42E-02 |
| Srf     | ILMN_2988299 | NM_175149.3    | 2.37 | 2.13E-03 |
| Tmem49  | ILMN_2591777 | NM_001081158.2 | 2.36 | 1.31E-03 |
| Plxdc1  | ILMN_1248298 | NM_025629.2    | 2.36 | 1.08E-03 |
| Tubb2c  | ILMN_2702061 | NM_010226.1    | 2.36 | 4.66E-02 |
| Dok4    | ILMN_1241168 | NM_031185.2    | 2.36 | 1.49E-02 |
| Slc6a6  | ILMN_2641467 | NM_016765.2    | 2.35 | 2.64E-03 |
| Cpne8   | ILMN_3151149 | NM_028385.1    | 2.34 | 2.56E-02 |
| Marecks | ILMN_1256142 | NM_009741.2    | 2.34 | 3.65E-02 |
| Map3k14 | ILMN_2665050 | NM_001081066.1 | 2.34 | 6.93E-04 |
| Myo9b   | ILMN_2612484 | NM_145629.1    | 2.34 | 1.17E-03 |
| Ly6a    | ILMN_1255416 | NM_011313.2    | 2.33 | 3.34E-02 |
| Pxn     | ILMN_3123303 | NM_001001738.2 | 2.33 | 4.33E-02 |
| Ciita   | ILMN_2678211 | NM_019813      | 2.33 | 2.14E-02 |

|               |              |                |      |          |
|---------------|--------------|----------------|------|----------|
| Dusp3         | ILMN_2684693 | NM_025858.1    | 2.33 | 3.81E-04 |
| Rab8a         | ILMN_2928051 | NM_183390.1    | 2.33 | 2.13E-04 |
| Mvp           | ILMN_2887065 | NM_010117.1    | 2.33 | 1.68E-02 |
| Cnn2          | ILMN_1226666 | NM_011609.2    | 2.31 | 4.12E-03 |
| Pla1a         | ILMN_2722024 | NM_012055.3    | 2.31 | 1.34E-02 |
| Leo1          | ILMN_2903351 | NM_010755.3    | 2.31 | 3.22E-02 |
| Slc38a2       | ILMN_2955671 | NM_009498.3    | 2.30 | 1.19E-02 |
| Trak2         | ILMN_2872698 | NM_011609.2    | 2.30 | 9.15E-04 |
| BC004728      | ILMN_1247198 | NM_172608.1    | 2.30 | 1.08E-02 |
| Polr1e        | ILMN_2709047 | NM_033268.3    | 2.30 | 2.11E-02 |
| Casp1         | ILMN_1247592 | NM_019572.2    | 2.30 | 2.74E-02 |
| Egfl7         | ILMN_1215919 | NM_011655.4    | 2.29 | 3.94E-02 |
| Ifitm3        | ILMN_2658501 | XM_001477632.1 | 2.29 | 4.62E-02 |
| Thbs1         | ILMN_2659151 | NM_001039562.1 | 2.29 | 6.20E-03 |
| Robo4         | ILMN_2942011 | NM_054085.2    | 2.29 | 3.86E-04 |
| St8sia4       | ILMN_2784230 | NM_138752.2    | 2.29 | 1.18E-02 |
| Dab2          | ILMN_1243329 | NM_028186.3    | 2.29 | 3.59E-02 |
| Mical2        | ILMN_1217875 | NM_008713.2    | 2.28 | 1.26E-03 |
| LOC100045542  | ILMN_1230893 | NM_016740.3    | 2.28 | 3.73E-02 |
| Lamp2         | ILMN_1217454 | NM_139064.1    | 2.28 | 3.78E-03 |
| LOC675228     | ILMN_1218325 | NM_028283.2    | 2.28 | 6.56E-04 |
| Acsl5         | ILMN_2892222 | NM_001083895.1 | 2.28 | 2.95E-03 |
| 9030425E11Rik | ILMN_2724194 | NM_007837.2    | 2.28 | 1.76E-03 |
| Tmc6          | ILMN_1213001 | NM_153557.1    | 2.27 | 3.18E-03 |
| Hist2h2aa1    | ILMN_2751948 | NM_011945.2    | 2.27 | 4.39E-03 |
| Rhot2         | ILMN_2839134 | NM_001033406.1 | 2.27 | 1.61E-02 |
| 1810015A11Rik | ILMN_2883952 | NM_010120.4    | 2.27 | 6.85E-04 |
| Rgs1          | ILMN_2625377 | NM_019422.2    | 2.26 | 4.20E-02 |

|               |              |             |      |          |
|---------------|--------------|-------------|------|----------|
| Enoph1        | ILMN_1233630 | NM_022325.4 | 2.26 | 3.09E-04 |
| Fgf6          | ILMN_2958386 | NM_023055.1 | 2.26 | 4.59E-03 |
| Cugbp1        | ILMN_2667971 | NM_009716.2 | 2.26 | 1.60E-03 |
| Entpd2        | ILMN_1237670 | NM_010516.1 | 2.26 | 2.45E-02 |
| Nek3          | ILMN_1252297 | NM_183016.1 | 2.26 | 1.27E-03 |
| Pcdh1         | ILMN_2597660 | NM_153138.3 | 2.25 | 2.04E-03 |
| Ehd1          | ILMN_2628757 | NM_148927.1 | 2.25 | 9.02E-03 |
| Dap           | ILMN_1234812 | NM_008390.1 | 2.25 | 2.79E-02 |
| Sox9          | ILMN_3007428 | NM_144850.1 | 2.25 | 2.95E-03 |
| 1200009O22Rik | ILMN_2615431 | NM_145545.2 | 2.24 | 1.31E-02 |
| Fbxo30        | ILMN_2431871 | NM_025445.4 | 2.24 | 3.35E-02 |
| Ltbp3         | ILMN_2776619 | NM_181848.3 | 2.24 | 4.44E-02 |
| Ngfb          | ILMN_2660233 | NM_013789.1 | 2.24 | 2.00E-03 |
| Mtap4         | ILMN_2633367 | NM_028035.3 | 2.24 | 2.69E-03 |
| Pkp2          | ILMN_2927565 | NM_133971.1 | 2.23 | 2.25E-03 |
| Vps37c        | ILMN_2675152 | NM_201362.1 | 2.23 | 2.41E-03 |
| Plaa          | ILMN_1221702 | NM_027154.3 | 2.23 | 6.64E-03 |
| Tap2          | ILMN_2686721 | NM_008800.1 | 2.22 | 3.69E-02 |
| Ncf4          | ILMN_2743013 | NM_138752.1 | 2.22 | 8.23E-03 |
| Ubtd2         | ILMN_2822552 | NM_019765   | 2.22 | 3.97E-03 |
| Kctd10        | ILMN_2596117 | NM_008845.4 | 2.21 | 7.55E-04 |
| Elovl1        | ILMN_2723491 | NM_007564.2 | 2.21 | 3.58E-03 |
| Prune         | ILMN_2706495 | NM_020493.1 | 2.21 | 4.08E-02 |
| Relb          | ILMN_1246841 | NM_029478.3 | 2.21 | 3.61E-03 |
| Muted         | ILMN_2705131 | NM_028199.2 | 2.20 | 2.69E-03 |
| Ppp2ca        | ILMN_2611821 | NM_146116.1 | 2.20 | 3.53E-02 |
| Zfp346        | ILMN_1253077 | NM_053246.2 | 2.20 | 1.26E-02 |
| 2310046K01Rik | ILMN_2675760 | NM_009320.3 | 2.19 | 9.77E-03 |



|              |              |                |      |          |
|--------------|--------------|----------------|------|----------|
| Galnt10      | ILMN_2878781 | NM_001033851.1 | 2.19 | 4.15E-03 |
| Mtmr11       | ILMN_2642922 | NM_008538.2    | 2.18 | 1.80E-02 |
| Use1         | ILMN_2667101 | NM_016896.3    | 2.18 | 1.19E-04 |
| Tmc6         | ILMN_2513778 | NM_015742.2    | 2.18 | 7.26E-03 |
| Card10       | ILMN_2606660 | NM_010738.2    | 2.18 | 1.55E-02 |
| Samd4        | ILMN_3128535 | NM_133915.2    | 2.18 | 1.94E-03 |
| Slc12a2      | ILMN_2700059 | NM_007575.2    | 2.18 | 3.83E-03 |
| Arhgdig      | ILMN_2950622 | NM_028207.2    | 2.18 | 7.57E-04 |
| Unc119b      | ILMN_2590771 | NM_023126.2    | 2.18 | 8.21E-03 |
| Kif1b        | ILMN_3034877 | NM_080638.1    | 2.17 | 8.04E-03 |
| Egfl7        | ILMN_3163288 | NM_007725.2    | 2.17 | 1.57E-02 |
| St5          | ILMN_3154820 | NM_134102.3    | 2.17 | 4.06E-03 |
| Itga6        | ILMN_1231492 | NM_001039522.1 | 2.16 | 1.48E-02 |
| EG667977     | ILMN_2835683 | NM_175121.3    | 2.16 | 3.88E-02 |
| Camkk1       | ILMN_1242310 | NM_172406.2    | 2.16 | 4.54E-04 |
| Pacsin3      | ILMN_2693815 | NM_174992.2    | 2.16 | 2.27E-02 |
| Lst1         | ILMN_2609323 | NM_022811.2    | 2.16 | 1.07E-02 |
| Klk8         | ILMN_2675232 | NM_009807.2    | 2.15 | 5.54E-03 |
| Odc1         | ILMN_3008406 | NM_198724.1    | 2.15 | 1.87E-03 |
| Ywhaz        | ILMN_2952914 | NM_025378.2    | 2.15 | 3.48E-02 |
| Tmem49       | ILMN_2591781 | NM_011580.3    | 2.15 | 1.08E-02 |
| Ythdf2       | ILMN_1225360 | NM_028783.2    | 2.15 | 3.21E-03 |
| Supt5h       | ILMN_2661458 | NM_009183.1    | 2.14 | 2.18E-02 |
| LOC100047749 | ILMN_1255207 | NM_023118.1    | 2.14 | 7.18E-03 |
| Heatr3       | ILMN_3007728 | NM_177282.4    | 2.14 | 4.29E-02 |
| Reep3        | ILMN_1250538 | XM_001473941.1 | 2.14 | 5.74E-04 |
| Fsd2         | ILMN_1215238 | NM_010685.3    | 2.13 | 3.56E-03 |
| Fes          | ILMN_2695793 | XR_034614.1    | 2.13 | 2.89E-02 |

|         |              |             |      |          |
|---------|--------------|-------------|------|----------|
| Tmem53  | ILMN_2656884 | NM_027976.2 | 2.13 | 4.24E-03 |
| Pacsin3 | ILMN_2589015 | NM_133733.4 | 2.13 | 3.96E-03 |
| Slc39a6 | ILMN_2681516 | NM_145439.1 | 2.12 | 8.14E-03 |
| Mdfic   | ILMN_2704637 | NM_013549   | 2.12 | 3.51E-03 |
| Stat3   | ILMN_2698046 | NM_145999.2 | 2.12 | 4.20E-02 |
| Lrrc8d  | ILMN_2766455 | NM_026940.1 | 2.12 | 1.30E-03 |
| Centg3  | ILMN_2754598 | NM_015811.1 | 2.12 | 1.30E-03 |
| Cdc42   | ILMN_2946862 | NM_026421.2 | 2.12 | 1.92E-03 |
| Ednrb   | ILMN_2917471 | NM_010204.1 | 2.12 | 1.91E-02 |
| Emilin1 | ILMN_2668462 | NM_198683.1 | 2.11 | 3.19E-02 |
| Rasip1  | ILMN_2740217 | NM_009849.1 | 2.11 | 2.79E-02 |
| Arf3    | ILMN_1252195 | NM_011848.2 | 2.10 | 1.08E-02 |
| Mical1  | ILMN_1215951 | NM_029357.3 | 2.10 | 4.10E-03 |
| Nfat5   | ILMN_2612448 | NM_010119.5 | 2.10 | 5.23E-03 |
| Slc19a2 | ILMN_1250531 | NM_146057.1 | 2.10 | 2.75E-02 |
| Bach2   | ILMN_2819558 | NM_011448.2 | 2.09 | 3.95E-02 |
| Eif3k   | ILMN_2718416 | NM_025817.3 | 2.09 | 4.52E-03 |
| Extl1   | ILMN_2879534 | XM_125493   | 2.09 | 2.58E-02 |
| Unc119b | ILMN_1214441 | NM_008520.2 | 2.09 | 7.46E-03 |
| Plxdc1  | ILMN_2827162 | NM_013609.1 | 2.08 | 8.40E-03 |
| Csrp3   | ILMN_2789650 | NM_008633.2 | 2.08 | 3.64E-05 |
| Luzp1   | ILMN_2942276 | NM_026163.1 | 2.08 | 2.14E-02 |
| Pros1   | ILMN_1235499 | NM_181403.2 | 2.08 | 4.05E-03 |
| Tuba1b  | ILMN_2986393 | NM_172695.2 | 2.08 | 2.12E-03 |
| Tcirlg1 | ILMN_2954881 | NM_011530.2 | 2.08 | 1.62E-02 |
| Wipi1   | ILMN_1236411 | NM_008677.1 | 2.07 | 2.38E-03 |
| Acot10  | ILMN_2910627 | NM_173784.3 | 2.07 | 1.44E-03 |
| Parp3   | ILMN_2870302 | NM_026145.3 | 2.07 | 4.02E-03 |

|               |              |                |      |          |
|---------------|--------------|----------------|------|----------|
| 9130005N14Rik | ILMN_1217235 | NM_001039175.1 | 2.07 | 2.64E-02 |
| Skap2         | ILMN_2936671 | NM_173347.2    | 2.07 | 5.59E-03 |
| Aqp8          | ILMN_2756379 | NM_009046.2    | 2.07 | 3.56E-03 |
| Ddit3         | ILMN_2652909 | NM_139063.1    | 2.07 | 3.18E-02 |
| Tnip1         | ILMN_2417863 | NM_019411.4    | 2.06 | 2.80E-02 |
| Uchl1         | ILMN_1225261 | NM_012017.2    | 2.06 | 1.37E-02 |
| Dab2          | ILMN_3091641 | NM_027172.2    | 2.06 | 2.86E-02 |
| Aldoa         | ILMN_2599130 | NM_134189.2    | 2.06 | 2.93E-05 |
| 2810405J04Rik | ILMN_1224651 | NM_181409.2    | 2.06 | 1.30E-02 |
| Gcap14        | ILMN_3130768 | NM_025917.3    | 2.05 | 2.39E-02 |
| Gimap8        | ILMN_3088269 | NM_145439.1    | 2.05 | 2.42E-02 |
| Tcf4          | ILMN_2636463 | NM_130859.2    | 2.05 | 1.31E-02 |
| Kifc3         | ILMN_1229531 | NM_001037221.1 | 2.05 | 4.29E-03 |
| Alg5          | ILMN_1222503 | NM_009194.2    | 2.05 | 2.65E-04 |
| Nomo1         | ILMN_2626389 | NM_008113.3    | 2.05 | 2.72E-03 |
| Zfp768        | ILMN_2721919 | NM_175352.4    | 2.05 | 3.51E-02 |
| Numa1         | ILMN_2735625 | NM_008441.2    | 2.05 | 4.92E-02 |
| Sez6l2        | ILMN_2811861 | NM_198725.1    | 2.05 | 3.98E-03 |
| Fkbp11        | ILMN_1224635 | NM_029811.2    | 2.05 | 8.36E-04 |
| Atp8b1        | ILMN_2977129 | NM_008397.3    | 2.04 | 1.39E-02 |
| Hdgfrp2       | ILMN_2617112 | NM_001081032.1 | 2.04 | 7.53E-03 |
| Notch1        | ILMN_1241915 | NM_018883.2    | 2.04 | 1.99E-02 |
| Dusp3         | ILMN_2918927 | NM_030880.1    | 2.04 | 1.72E-03 |
| Ncald         | ILMN_2652414 | XM_359281.1    | 2.04 | 2.95E-02 |
| 1700025G04Rik | ILMN_2669982 | NM_008940.2    | 2.04 | 2.17E-02 |
| Kcnj8         | ILMN_1253409 | NM_013614.1    | 2.04 | 2.02E-02 |
| Nostrin       | ILMN_2821676 | NM_011740.2    | 2.03 | 3.26E-02 |
| Snx33         | ILMN_1212693 | NM_029478.2    | 2.03 | 6.65E-03 |

|               |              |                |      |          |
|---------------|--------------|----------------|------|----------|
| Stard4        | ILMN_1240445 | NM_145393.3    | 2.03 | 1.55E-02 |
| Gnb1          | ILMN_2733852 | NM_013676.1    | 2.03 | 4.98E-02 |
| Rassf5        | ILMN_2825020 | XM_001478817.1 | 2.03 | 1.43E-02 |
| Mylc2b        | ILMN_2953531 | NM_172757.3    | 2.03 | 4.98E-02 |
| Ets2          | ILMN_2594714 | NM_178606.4    | 2.03 | 1.67E-02 |
| 1200002N14Rik | ILMN_1219820 | NM_172904.2    | 2.03 | 1.76E-02 |
| Il2rg         | ILMN_2886646 | NM_010194.2    | 2.03 | 7.48E-03 |
| St6galnac4    | ILMN_1259566 | NM_026837.2    | 2.02 | 4.14E-02 |
| St8sia4       | ILMN_2671195 | NM_028733.2    | 2.02 | 1.89E-02 |
| Osm           | ILMN_2919411 | NM_139143.2    | 2.02 | 8.95E-03 |
| Creb3         | ILMN_1216285 | NM_175088.3    | 2.02 | 2.00E-04 |
| 2310022A10Rik | ILMN_3004931 | NM_213659.2    | 2.02 | 3.21E-03 |
| Thbs3         | ILMN_2654651 | NM_178701.2    | 2.02 | 2.79E-02 |
| Tpd52         | ILMN_3091288 | NM_139153.1    | 2.02 | 2.90E-02 |
| Uap1l1        | ILMN_2467800 | NM_009861.1    | 2.02 | 4.50E-03 |
| LOC100044475  | ILMN_2596917 | NM_007904.2    | 2.02 | 1.55E-02 |
| Riok1         | ILMN_2676512 | NM_133918.1    | 2.02 | 2.05E-02 |
| Centg3        | ILMN_2754596 | NM_028544.1    | 2.02 | 3.66E-02 |
| 4933428G20Rik | ILMN_1247490 | NM_007478.3    | 2.02 | 3.27E-02 |
| Coro1c        | ILMN_2665387 | NM_138315.1    | 2.02 | 2.08E-02 |
| Gimap1        | ILMN_3141165 | NM_133957.2    | 2.01 | 2.07E-02 |
| Clic1         | ILMN_2596611 | NM_054087.2    | 2.01 | 2.09E-02 |
| Wsb1          | ILMN_1250815 | NM_007521.2    | 2.00 | 2.57E-02 |
| Naca          | ILMN_2651642 | NM_028659.2    | 2.00 | 2.80E-02 |
| Pfkl          | ILMN_1236539 | NM_019578.1    | 2.00 | 6.89E-03 |
| Tgfb2         | ILMN_1225196 | NM_175352.4    | 2.00 | 1.67E-02 |
| Cbr3          | ILMN_2896768 | NM_028199.2    | 2.00 | 9.87E-03 |
| Rps6kl1       | ILMN_2649333 | NM_013808.3    | 2.00 | 1.89E-02 |

|              |              |                |      |          |
|--------------|--------------|----------------|------|----------|
| Ngfb         | ILMN_2937596 | NM_024452.2    | 2.00 | 4.21E-02 |
| Golga3       | ILMN_1260175 | NM_011173.2    | 1.99 | 1.26E-02 |
| Faim3        | ILMN_1221820 | NM_011654.2    | 1.99 | 3.86E-03 |
| Pde4dip      | ILMN_2751354 | NM_016921.2    | 1.99 | 1.70E-02 |
| Rhog         | ILMN_2592620 | NM_145940.2    | 1.98 | 1.76E-02 |
| Nln          | ILMN_2756113 | NM_022816.1    | 1.98 | 6.89E-03 |
| LOC100042777 | ILMN_1217879 | NM_145619.2    | 1.98 | 2.66E-02 |
| Rgs16        | ILMN_2600744 | NM_026667.2    | 1.98 | 3.56E-02 |
| Cd97         | ILMN_2694170 | NM_018773.2    | 1.98 | 1.51E-02 |
| Sdc3         | ILMN_2715042 | NM_007474.1    | 1.97 | 1.06E-02 |
| Ramp3        | ILMN_2749052 | NM_007837.2    | 1.97 | 1.04E-02 |
| Oas1g        | ILMN_1253808 | NM_021327.1    | 1.97 | 3.47E-02 |
| Aif1         | ILMN_2804487 | NM_011670.1    | 1.97 | 3.60E-02 |
| Gnl3         | ILMN_2601639 | NM_001008702.1 | 1.97 | 4.24E-03 |
| Gusb         | ILMN_2855334 | NM_007438.3    | 1.97 | 2.57E-02 |
| Ankfy1       | ILMN_2771712 | NM_133747.2    | 1.97 | 9.33E-03 |
| Col8a2       | ILMN_2839646 | NM_028407.3    | 1.96 | 3.38E-02 |
| Spsb3        | ILMN_2994108 | NM_212486.2    | 1.96 | 3.76E-02 |
| Cdr2         | ILMN_1255513 | NM_013685.2    | 1.96 | 3.61E-02 |
| Dnajb6       | ILMN_3060442 | NM_010631.2    | 1.95 | 1.60E-02 |
| Tax1bp3      | ILMN_1217309 | NM_025442.3    | 1.95 | 1.58E-02 |
| Tmem192      | ILMN_3162499 | NM_153057.3    | 1.94 | 7.93E-03 |
| Centd3       | ILMN_1243107 | NM_146202.1    | 1.94 | 9.47E-03 |
| Bin1         | ILMN_2946466 | NM_133947.2    | 1.94 | 2.13E-02 |
| Luzp1        | ILMN_2718645 | NM_144926.2    | 1.94 | 2.18E-02 |
| Dgat1        | ILMN_2807284 | NM_024169.3    | 1.94 | 7.68E-03 |
| Slc9a3r2     | ILMN_1218241 | NM_001001488.3 | 1.94 | 3.04E-02 |
| Cugbp1       | ILMN_2667972 | NM_008233.2    | 1.94 | 1.06E-02 |

|               |              |                |      |          |
|---------------|--------------|----------------|------|----------|
| Csrp3         | ILMN_2742068 | NM_008714.2    | 1.93 | 1.78E-04 |
| Rab5c         | ILMN_1225414 | NM_028207.1    | 1.93 | 6.75E-03 |
| Rab32         | ILMN_1221274 | NM_134094.3    | 1.93 | 1.47E-02 |
| Tbx3          | ILMN_3139514 | NM_197990.2    | 1.93 | 4.57E-02 |
| Spred1        | ILMN_2490252 | NM_008428.4    | 1.93 | 2.69E-03 |
| Abi1          | ILMN_1234139 | NM_181547.2    | 1.93 | 1.54E-02 |
| Coro1a        | ILMN_2733793 | NM_175483.5    | 1.93 | 1.51E-02 |
| Mapk4         | ILMN_1226868 | NM_133774.4    | 1.92 | 2.88E-02 |
| Rapgef1       | ILMN_1226718 | NM_008142.3    | 1.92 | 2.88E-02 |
| Rap2c         | ILMN_3135473 | NM_018750.2    | 1.92 | 3.61E-03 |
| LOC100047856  | ILMN_2589785 | NM_023402.1    | 1.92 | 3.25E-02 |
| Tro           | ILMN_2484147 | NM_011809.2    | 1.92 | 1.61E-02 |
| Eef1a1        | ILMN_2588052 | NM_027878.2    | 1.92 | 3.73E-02 |
| Gsdmdc1       | ILMN_2941324 | NM_013563.3    | 1.92 | 8.92E-03 |
| Sp100         | ILMN_2846812 | NM_011373.2    | 1.92 | 4.01E-02 |
| Gnao1         | ILMN_2753422 | NM_009183.1    | 1.91 | 5.45E-03 |
| Ammecr11      | ILMN_1229706 | NM_001013365.1 | 1.91 | 3.18E-03 |
| Ensa          | ILMN_3032778 | NM_013497.3    | 1.91 | 1.56E-03 |
| 2510012J08Rik | ILMN_1255323 | NM_175107.3    | 1.91 | 2.18E-02 |
| Tmc6          | ILMN_2471166 | NM_013691.1    | 1.91 | 1.87E-02 |
| Flna          | ILMN_1245994 | NM_009412.2    | 1.91 | 4.79E-02 |
| Rap2c         | ILMN_1249467 | NM_001033293.2 | 1.91 | 1.36E-02 |
| Akap1         | ILMN_3146196 | XM_001472256.1 | 1.91 | 4.81E-02 |
| Zfp259        | ILMN_1241970 | NM_024242.2    | 1.91 | 4.27E-02 |
| Anapc7        | ILMN_2870688 | NM_139153.1    | 1.91 | 6.15E-03 |
| Nt5c2         | ILMN_2788065 | NM_021493.2    | 1.91 | 9.59E-03 |
| Ints4         | ILMN_2678269 | NM_011779.3    | 1.90 | 8.60E-03 |
| Ube2f         | ILMN_2614522 | NM_008376.3    | 1.90 | 2.24E-02 |

|              |              |                |      |          |
|--------------|--------------|----------------|------|----------|
| Erp29        | ILMN_1239185 | NM_033444.1    | 1.90 | 1.15E-02 |
| Coro2b       | ILMN_2902228 | NM_001042565.2 | 1.90 | 1.66E-02 |
| Myo6         | ILMN_2656854 | NM_013608.2    | 1.90 | 6.93E-03 |
| Jund1        | ILMN_2682788 | NM_008826.3    | 1.90 | 4.17E-02 |
| Supt5h       | ILMN_2950441 | NM_009367.2    | 1.90 | 1.57E-02 |
| Rps6ka1      | ILMN_2975718 | NM_173047.2    | 1.90 | 6.70E-03 |
| Exoc3l       | ILMN_1236298 | NM_146244.3    | 1.90 | 2.34E-02 |
| Cenpt        | ILMN_2653972 | NM_013609.1    | 1.90 | 1.57E-02 |
| Dmwd         | ILMN_2914010 | NM_008146.3    | 1.90 | 1.43E-02 |
| Xpo5         | ILMN_1216198 | NM_026976.2    | 1.89 | 7.37E-03 |
| Fbxw17       | ILMN_2615145 | NM_178080.4    | 1.89 | 9.60E-03 |
| Pgam2        | ILMN_2588815 | NM_019566.3    | 1.89 | 2.07E-02 |
| LOC100045981 | ILMN_1233402 | NM_029447.1    | 1.89 | 3.64E-02 |
| Fadd         | ILMN_1223126 | XM_001478939.1 | 1.89 | 2.18E-02 |
| Aoc3         | ILMN_2625920 | NM_011267.2    | 1.89 | 8.21E-03 |
| Dync1h1      | ILMN_2689274 | NM_011925.1    | 1.89 | 3.73E-02 |
| Tspan14      | ILMN_1257666 | NM_011520.3    | 1.89 | 2.50E-02 |
| Coro1b       | ILMN_2788546 | NM_019511.3    | 1.89 | 1.85E-02 |
| LOC622404    | ILMN_2872552 | NM_011852.2    | 1.89 | 2.47E-02 |
| Lgals1       | ILMN_2619107 | NM_019467.2    | 1.89 | 1.87E-02 |
| Serpinb6a    | ILMN_1250279 | NM_178846.2    | 1.88 | 3.76E-02 |
| Pik3r6       | ILMN_3160107 | NM_010368.1    | 1.88 | 3.18E-02 |
| Gmppb        | ILMN_2744909 | NM_009671.5    | 1.88 | 1.58E-02 |
| Serf2        | ILMN_1223346 | NM_199473.2    | 1.88 | 1.60E-03 |
| Actl6a       | ILMN_1254256 | NM_027141.1    | 1.88 | 4.81E-02 |
| Wwc2         | ILMN_2685464 | NM_007672.1    | 1.88 | 1.50E-03 |
| Bicd2        | ILMN_2469294 | NM_001037940.1 | 1.87 | 2.13E-02 |
| Csnk1g3      | ILMN_2793946 | NM_029564.2    | 1.87 | 1.56E-02 |

|               |              |                |      |          |
|---------------|--------------|----------------|------|----------|
| Sae1          | ILMN_2423789 | NM_028427.2    | 1.87 | 1.59E-03 |
| Kif3c         | ILMN_2593410 | NM_139206.1    | 1.87 | 2.38E-03 |
| Vps29         | ILMN_2955883 | NM_009668.1    | 1.87 | 2.78E-02 |
| Rem1          | ILMN_1228010 | NM_024452.2    | 1.86 | 1.85E-03 |
| Fez2          | ILMN_2761876 | NM_010046.2    | 1.86 | 3.59E-02 |
| Frap1         | ILMN_2756460 | NM_023449.2    | 1.86 | 9.94E-03 |
| Gprc5b        | ILMN_2974506 | NM_198683.1    | 1.85 | 8.37E-03 |
| Snai1         | ILMN_2904765 | NM_013808.3    | 1.85 | 3.53E-02 |
| Zbtb46        | ILMN_2619179 | NM_024456.2    | 1.85 | 9.33E-03 |
| Chrnbl        | ILMN_3001481 | NM_026405.3    | 1.85 | 3.42E-02 |
| AA536749      | ILMN_1254067 | NM_011535.2    | 1.85 | 4.60E-02 |
| Gpc1          | ILMN_2635784 | NM_033524      | 1.85 | 2.76E-02 |
| Cdkl2         | ILMN_2657790 | NM_001077190.1 | 1.85 | 1.33E-02 |
| Erlin2        | ILMN_1241908 | NM_009898.2    | 1.85 | 1.37E-02 |
| BC037034      | ILMN_1257019 | NM_172632.2    | 1.85 | 4.59E-03 |
| LOC100045005  | ILMN_1238838 | NM_054050.2    | 1.85 | 3.35E-02 |
| C230078M08Rik | ILMN_1245335 | NM_172413.2    | 1.84 | 1.53E-02 |
| Lman1l        | ILMN_1212980 | XM_001479297.1 | 1.84 | 2.98E-02 |
| Poldip3       | ILMN_2694397 | NM_001002272.2 | 1.84 | 2.67E-02 |
| St5           | ILMN_1250665 | NM_010106.2    | 1.84 | 4.81E-02 |
| Mrps18b       | ILMN_2865239 | NM_026960.1    | 1.84 | 2.36E-02 |
| Aacs          | ILMN_1253601 | NM_013673.2    | 1.84 | 2.07E-02 |
| Rgs12         | ILMN_2686745 | NM_010308.3    | 1.84 | 1.05E-02 |
| Gimap9        | ILMN_1236553 | NM_153515.3    | 1.84 | 1.77E-02 |
| Slc25a45      | ILMN_1251109 | NM_001026212.1 | 1.83 | 1.23E-02 |
| Zc3h7a        | ILMN_2430275 | NM_027381.1    | 1.83 | 9.10E-03 |
| Hspb8         | ILMN_2944366 | NM_145439.1    | 1.83 | 4.08E-02 |
| B230380D07Rik | ILMN_1214163 | NM_010227.2    | 1.83 | 4.07E-02 |



|               |              |                |      |          |
|---------------|--------------|----------------|------|----------|
| Micall2       | ILMN_2711772 | NM_172413.2    | 1.83 | 4.73E-02 |
| Galnt2        | ILMN_1242677 | NM_001042541.1 | 1.82 | 4.90E-03 |
| Des           | ILMN_2836982 | NM_011752.2    | 1.82 | 3.34E-02 |
| D030070L09Rik | ILMN_2613182 | NM_019805.2    | 1.82 | 4.35E-02 |
| Cbfb          | ILMN_2757743 | NM_029810.2    | 1.82 | 1.55E-02 |
| Sacm11        | ILMN_2929952 | NM_027256.1    | 1.82 | 9.46E-03 |
| Nckipsd       | ILMN_2619380 | NM_026454.3    | 1.82 | 1.37E-02 |
| Large         | ILMN_1249514 | NM_026129.2    | 1.82 | 4.92E-02 |
| Xpnpep1       | ILMN_1253317 | NM_175484.1    | 1.82 | 9.29E-03 |
| Prr7          | ILMN_3162239 | NM_001039546.1 | 1.82 | 3.56E-02 |
| Slc1a2        | ILMN_3076439 | NM_010592.3    | 1.82 | 7.48E-03 |
| Bid           | ILMN_3161878 | NM_013676.1    | 1.82 | 8.29E-03 |
| Zc3hc1        | ILMN_2602588 | NM_009097.1    | 1.82 | 4.13E-02 |
| Arpc5         | ILMN_2792809 | NM_177788.4    | 1.81 | 1.61E-02 |
| Zfp90         | ILMN_2487482 | NM_177150.2    | 1.81 | 1.77E-02 |
| Dusp6         | ILMN_2925711 | NM_010058.1    | 1.81 | 6.60E-03 |
| Nola1         | ILMN_1226280 | NM_028198.1    | 1.81 | 4.03E-02 |
| Acly          | ILMN_1240770 | NM_175401.3    | 1.81 | 1.60E-03 |
| Fadd          | ILMN_2662509 | NM_018870.2    | 1.80 | 1.87E-02 |
| Stk24         | ILMN_2749235 | XM_001475298.1 | 1.80 | 1.82E-02 |
| Tex264        | ILMN_3111593 | NM_010175.4    | 1.80 | 1.69E-02 |
| Cugbp2        | ILMN_1252673 | NM_009675.1    | 1.80 | 3.34E-02 |
| Purb          | ILMN_1247990 | NM_030238.2    | 1.80 | 1.85E-02 |
| Nagk          | ILMN_2653215 | NM_145928.1    | 1.80 | 1.17E-02 |
| Nt5c2         | ILMN_2630939 | NM_011778.1    | 1.80 | 2.17E-02 |
| Mbc2          | ILMN_1240994 | NM_001037913.1 | 1.80 | 8.04E-03 |
| Sec63         | ILMN_2714822 | NM_008495.1    | 1.80 | 4.06E-02 |
| Slc35c2       | ILMN_2729374 | NM_009254.2    | 1.79 | 2.05E-02 |

|               |              |                |      |          |
|---------------|--------------|----------------|------|----------|
| Il27ra        | ILMN_3002095 | NM_001004435.2 | 1.79 | 4.07E-03 |
| Trove2        | ILMN_2952466 | NM_177910.2    | 1.79 | 4.92E-02 |
| Kns2          | ILMN_3042059 | NM_011354.2    | 1.79 | 1.30E-02 |
| Cib1          | ILMN_2621847 | NM_019673.1    | 1.79 | 6.41E-03 |
| Itgb1bp1      | ILMN_2924243 | NM_133791.4    | 1.79 | 1.04E-02 |
| 5730589K01Rik | ILMN_2779636 | NM_029791      | 1.79 | 4.23E-02 |
| Arhgef19      | ILMN_1212875 | NM_152809.2    | 1.79 | 3.92E-02 |
| Cdca4         | ILMN_1214671 | NM_019748.2    | 1.79 | 3.35E-02 |
| Rbm45         | ILMN_3163340 | NM_008445.2    | 1.79 | 4.07E-03 |
| Cox4nb        | ILMN_2766580 | NM_019780.1    | 1.79 | 4.52E-02 |
| St6galnac4    | ILMN_1248439 | NM_009047.5    | 1.79 | 1.21E-02 |
| Sox13         | ILMN_1244292 | NM_199448.1    | 1.79 | 9.19E-03 |
| Pdpk1         | ILMN_3124885 | NM_020009.1    | 1.78 | 3.18E-02 |
| Sdcbp2        | ILMN_2825446 | NM_022420.1    | 1.78 | 3.18E-02 |
| Tek           | ILMN_1220170 | NM_011427.2    | 1.78 | 1.74E-02 |
| Tmem127       | ILMN_2746107 | NM_028125.2    | 1.78 | 1.16E-03 |
| Chmp4b        | ILMN_2776764 | NM_009601.3    | 1.78 | 4.08E-02 |
| Dlgap4        | ILMN_1220861 | NM_201245.2    | 1.78 | 9.11E-03 |
| Prkd3         | ILMN_2834728 | NM_016696.3    | 1.78 | 6.02E-03 |
| Gnb3          | ILMN_1218235 | NM_177270.3    | 1.78 | 4.22E-03 |
| Rbm5          | ILMN_2942499 | NM_153592.1    | 1.78 | 2.62E-02 |
| Tmed4         | ILMN_2906414 | NM_153161.1    | 1.78 | 4.24E-03 |
| Lcp1          | ILMN_1216871 | XR_031422.1    | 1.78 | 2.98E-02 |
| Rela          | ILMN_2740859 | NM_176995.2    | 1.78 | 1.29E-02 |
| Arhgap4       | ILMN_2677876 | NM_199222.2    | 1.78 | 9.87E-03 |
| Elk3          | ILMN_1224644 | NM_178627.3    | 1.77 | 3.56E-03 |
| Ap2a2         | ILMN_1237891 | NM_001001326.1 | 1.77 | 1.56E-02 |
| Hspa4         | ILMN_2716838 | NM_025878.1    | 1.77 | 4.24E-03 |

|               |              |                |      |          |
|---------------|--------------|----------------|------|----------|
| Atp13a1       | ILMN_2942669 | NM_030210.1    | 1.77 | 2.14E-02 |
| Efha1         | ILMN_2645165 | NM_173402.1    | 1.76 | 4.40E-02 |
| Zfp646        | ILMN_2991339 | NM_174960.2    | 1.76 | 1.54E-02 |
| Nnmt          | ILMN_2665411 | NM_134154.3    | 1.76 | 4.49E-02 |
| Dpagt1        | ILMN_2641111 | NM_145931.1    | 1.76 | 2.04E-03 |
| Irf5          | ILMN_2621752 | NM_030704.1    | 1.76 | 1.18E-02 |
| Arrb2         | ILMN_2700848 | NM_172772.2    | 1.76 | 1.31E-02 |
| Lima1         | ILMN_1228374 | NM_174850.2    | 1.76 | 3.26E-02 |
| Pelo          | ILMN_2853658 | NM_139272.2    | 1.76 | 1.80E-02 |
| Lasp1         | ILMN_2879745 | NM_010043.1    | 1.76 | 3.11E-02 |
| Fnbp1l        | ILMN_2746132 | NM_172625.2    | 1.75 | 4.74E-02 |
| Rtn4          | ILMN_2699645 | NM_022309.3    | 1.75 | 4.76E-02 |
| Mgat1         | ILMN_2667234 | NM_030692.1    | 1.75 | 3.02E-03 |
| Elovl5        | ILMN_2652757 | NM_030729.4    | 1.75 | 3.40E-02 |
| BB146404      | ILMN_1245328 | NM_010687.1    | 1.75 | 2.33E-02 |
| Myo1b         | ILMN_2671235 | NM_133216.2    | 1.75 | 9.20E-03 |
| Ampd2         | ILMN_2701534 | NM_001030296.3 | 1.75 | 2.25E-02 |
| 4922503N01Rik | ILMN_2603888 | NM_001077515.1 | 1.75 | 7.13E-03 |
| Asphd2        | ILMN_3162247 | NM_007544.3    | 1.75 | 4.06E-02 |
| BC022687      | ILMN_2631663 | NM_172735.2    | 1.75 | 9.06E-03 |
| Srpk2         | ILMN_1251876 | NM_026369.1    | 1.75 | 1.15E-02 |
| 1110012M11Rik | ILMN_2753109 | NM_011764.2    | 1.75 | 9.65E-03 |
| Dpy30         | ILMN_2602396 | NM_026268.1    | 1.74 | 1.37E-03 |
| Hip1r         | ILMN_2780848 | NM_026578.2    | 1.74 | 2.22E-03 |
| Chfr          | ILMN_2985111 | NM_134037.2    | 1.74 | 4.95E-02 |
| Dusp3         | ILMN_2637538 | NM_010175.4    | 1.74 | 1.80E-02 |
| Nelf          | ILMN_3129497 | NM_145465.1    | 1.74 | 3.18E-02 |
| Prr13         | ILMN_2657516 | NM_011573.2    | 1.74 | 4.82E-02 |

|               |              |                |      |          |
|---------------|--------------|----------------|------|----------|
| Fermt2        | ILMN_2670022 | NM_010160.2    | 1.73 | 2.42E-02 |
| 6330442E10Rik | ILMN_2834294 | NM_011221.2    | 1.73 | 3.05E-02 |
| Mobk1b        | ILMN_1230545 | NM_019542.1    | 1.73 | 3.94E-02 |
| Pik3r6        | ILMN_3160361 | NM_029810.3    | 1.72 | 1.59E-02 |
| Tmco4         | ILMN_2891104 | NM_011843.2    | 1.72 | 1.52E-02 |
| Cc2d1b        | ILMN_2731197 | NM_153055.2    | 1.72 | 2.63E-02 |
| Zfp106        | ILMN_2482427 | NM_144893.1    | 1.72 | 2.39E-02 |
| Myom1         | ILMN_2626442 | NM_016671.2    | 1.72 | 4.28E-02 |
| Cdkl2         | ILMN_2657791 | NM_013835.1    | 1.72 | 2.23E-02 |
| 1810055E12Rik | ILMN_2805697 | NM_001025360.1 | 1.72 | 8.21E-03 |
| Stx6          | ILMN_2704177 | NM_011870.2    | 1.71 | 1.60E-02 |
| 4930453N24Rik | ILMN_2888766 | NM_008403.2    | 1.71 | 2.58E-02 |
| Man1b1        | ILMN_1239921 | NM_023434.1    | 1.71 | 2.50E-02 |
| Wdr75         | ILMN_2849571 | NM_172520.2    | 1.71 | 3.73E-02 |
| Snx18         | ILMN_2597886 | NM_028023.3    | 1.71 | 3.73E-02 |
| LOC100046056  | ILMN_2679937 | NM_153405.2    | 1.71 | 1.70E-02 |
| Tnks          | ILMN_1250052 | NM_010926.4    | 1.70 | 2.14E-02 |
| 1110039B18Rik | ILMN_2739128 | NM_011373.2    | 1.70 | 4.06E-02 |
| Muted         | ILMN_2705128 | NM_011439.2    | 1.70 | 2.02E-02 |
| Hecw2         | ILMN_3098718 | NM_001080773.1 | 1.70 | 2.51E-03 |
| Sipa1         | ILMN_2642133 | NM_145535.1    | 1.70 | 3.05E-02 |
| Mras          | ILMN_1252830 | NM_013690.2    | 1.70 | 1.33E-02 |
| Gnl3          | ILMN_3097726 | NM_175145.3    | 1.70 | 6.35E-03 |
| Lman11        | ILMN_3051282 | NM_029362.3    | 1.70 | 2.51E-02 |
| Ric3          | ILMN_3072117 | NM_001042487.1 | 1.70 | 2.35E-02 |
| 2310033P09Rik | ILMN_1232120 | NM_029239.2    | 1.70 | 1.28E-02 |
| Arf2          | ILMN_1214810 | NM_013530.1    | 1.69 | 1.80E-02 |
| Csf3r         | ILMN_1255648 | NM_148930.2    | 1.69 | 3.64E-02 |

|              |              |             |      |          |
|--------------|--------------|-------------|------|----------|
| Rdh11        | ILMN_2899318 | NM_134020.1 | 1.69 | 4.17E-02 |
| D14Ert668e   | ILMN_2827780 | NM_008879.3 | 1.69 | 2.02E-02 |
| Coro1a       | ILMN_2747060 | NM_009045.4 | 1.69 | 4.43E-02 |
| Galnt10      | ILMN_2750011 | NM_138630.1 | 1.68 | 1.48E-02 |
| BC067047     | ILMN_2705235 | NM_013508.1 | 1.68 | 4.92E-02 |
| Tmbim4       | ILMN_2730714 | NM_007459.2 | 1.68 | 2.25E-02 |
| Ncoa5        | ILMN_2794460 | NM_008300.3 | 1.68 | 4.83E-02 |
| LOC100041103 | ILMN_2761720 | NM_133224.1 | 1.68 | 1.42E-02 |
| Kpna3        | ILMN_1247312 | NM_028643.3 | 1.67 | 4.30E-02 |
| Cd97         | ILMN_2694175 | NM_172749.3 | 1.67 | 4.96E-02 |
| Scarb1       | ILMN_1223315 | NM_010924.1 | 1.67 | 1.66E-02 |
| AI606181     | ILMN_2762863 | NM_007875.2 | 1.67 | 3.42E-02 |
| Sell         | ILMN_3009860 | NM_012057.3 | 1.67 | 9.77E-03 |
| Klhdc4       | ILMN_2740710 | NM_145429.4 | 1.66 | 4.40E-02 |
| Ptpm         | ILMN_2875876 | NM_023063.1 | 1.66 | 3.35E-02 |
| BC004728     | ILMN_3130403 | NM_134058.1 | 1.66 | 4.80E-02 |
| Csk          | ILMN_1229530 | NM_010688.2 | 1.66 | 3.85E-02 |
| Efs          | ILMN_2634222 | NM_153118.1 | 1.66 | 4.91E-02 |
| EG622339     | ILMN_3006990 | NM_194054.2 | 1.65 | 3.62E-02 |
| Slc15a4      | ILMN_2790312 | NM_010794.2 | 1.65 | 4.10E-02 |
| Ctnnb1       | ILMN_1249568 | NM_134255.2 | 1.65 | 2.84E-02 |
| Cbfb         | ILMN_2837855 | NM_178908.3 | 1.65 | 2.04E-02 |
| Txlna        | ILMN_1218078 | NM_010863.2 | 1.65 | 9.07E-03 |
| Nrp2         | ILMN_3136656 | NM_028779.4 | 1.65 | 3.42E-02 |
| Ctdspl       | ILMN_2632489 | NM_153392.1 | 1.64 | 2.28E-02 |
| Golga1       | ILMN_1225918 | NM_028386.1 | 1.64 | 2.09E-02 |
| Csnk1g2      | ILMN_2875163 | NM_145450.3 | 1.64 | 3.76E-02 |
| Ptk2         | ILMN_2615901 | NM_009274   | 1.64 | 4.79E-02 |

|               |              |                |      |          |
|---------------|--------------|----------------|------|----------|
| Dhdds         | ILMN_2637850 | NM_028617.2    | 1.63 | 1.97E-02 |
| AI451617      | ILMN_2695412 | NM_024428.3    | 1.63 | 3.82E-03 |
| Zcchc6        | ILMN_1220072 | NM_145070.2    | 1.63 | 1.98E-02 |
| 8430410A17Rik | ILMN_2604263 | NM_172717.1    | 1.62 | 4.87E-02 |
| Arpc3         | ILMN_2603725 | NM_028207.2    | 1.62 | 4.60E-02 |
| Ptdss1        | ILMN_2745130 | NM_001039387.1 | 1.62 | 1.05E-02 |
| Mapre1        | ILMN_2664972 | NM_025385.2    | 1.62 | 1.04E-02 |
| Gsdmdc1       | ILMN_2748928 | NM_146054.2    | 1.62 | 4.06E-02 |
| Aars          | ILMN_1258394 | NM_178745.3    | 1.61 | 8.93E-03 |
| AI413582      | ILMN_2857595 | NM_145571      | 1.61 | 3.50E-02 |
| Cpsf1         | ILMN_3139668 | NM_001004435.2 | 1.61 | 2.76E-02 |
| Atp9b         | ILMN_2700425 | NM_029857.2    | 1.61 | 2.20E-02 |
| Senp2         | ILMN_1250929 | NM_177045.2    | 1.61 | 2.59E-02 |
| Dnttip1       | ILMN_1256348 | NM_011743.2    | 1.61 | 9.69E-03 |
| Cyb561d1      | ILMN_2624358 | NM_010867.2    | 1.61 | 4.86E-02 |
| Rabgef1       | ILMN_1226143 | NM_177270.3    | 1.61 | 3.18E-02 |
| Nrip3         | ILMN_2875404 | NM_026437.1    | 1.61 | 1.73E-02 |
| Slc25a5       | ILMN_2660099 | NM_021433.3    | 1.60 | 3.20E-02 |
| AI450540      | ILMN_2704690 | NM_026273.1    | 1.60 | 1.58E-02 |
| Pou2af1       | ILMN_1228328 | NM_001029983.1 | 1.60 | 4.80E-02 |
| 1810020D17Rik | ILMN_2896944 | NM_028599.1    | 1.60 | 3.02E-02 |
| Zhx1          | ILMN_2479530 | NM_130796.3    | 1.60 | 4.44E-02 |
| Abi2          | ILMN_3006643 | XM_001475483.1 | 1.59 | 3.17E-02 |
| Prmt3         | ILMN_2948712 | NM_175091.3    | 1.59 | 3.64E-02 |
| Slc35c2       | ILMN_2895000 | NM_144525      | 1.59 | 3.94E-02 |
| Dclk2         | ILMN_2990152 | NM_139063.1    | 1.58 | 1.65E-02 |
| 2310002L09Rik | ILMN_1214119 | NM_001001883.2 | 1.58 | 2.29E-02 |
| Rnf185        | ILMN_2957036 | NM_011379.3    | 1.58 | 2.17E-02 |

|               |              |                |      |          |
|---------------|--------------|----------------|------|----------|
| Yeats4        | ILMN_3002281 | NM_008624.3    | 1.58 | 1.90E-02 |
| Tubb2b        | ILMN_2825574 | NM_178846.1    | 1.58 | 4.73E-02 |
| Hook2         | ILMN_1235962 | NM_199222.1    | 1.58 | 1.03E-02 |
| Mov10         | ILMN_2915279 | NM_001038624.1 | 1.58 | 1.58E-02 |
| Cpsf1         | ILMN_3062133 | NM_024210.2    | 1.58 | 3.58E-02 |
| Zdhhc18       | ILMN_3162113 | NM_007477.4    | 1.57 | 3.53E-02 |
| Pou2f2        | ILMN_2687602 | NM_007782.1    | 1.57 | 4.14E-02 |
| Gpatch4       | ILMN_1219670 | NM_021557.2    | 1.57 | 4.10E-02 |
| Naip5         | ILMN_3059557 | NM_199015.1    | 1.57 | 4.37E-02 |
| Slc25a24      | ILMN_1213947 | NM_009898.2    | 1.57 | 2.39E-02 |
| Napsa         | ILMN_1230302 | NM_134189.2    | 1.57 | 9.00E-03 |
| Cstf1         | ILMN_1216029 | NM_177782.3    | 1.57 | 1.16E-02 |
| Dbnl          | ILMN_2710604 | NM_026617.3    | 1.57 | 1.61E-02 |
| Renbp         | ILMN_2674533 | NM_144892.1    | 1.57 | 4.65E-02 |
| 8430427H17Rik | ILMN_2910020 | XM_001476013.1 | 1.57 | 2.46E-02 |
| Bax           | ILMN_2907655 | NM_008466.3    | 1.56 | 3.83E-02 |
| Cdk5rap2      | ILMN_2842859 | NM_011925.1    | 1.56 | 1.77E-02 |
| Arhgap9       | ILMN_2650739 | NM_016741.1    | 1.56 | 1.87E-02 |
| Naca          | ILMN_2955104 | XR_035118.1    | 1.55 | 2.27E-02 |
| 5033414D02Rik | ILMN_2818396 | NM_011346.1    | 1.55 | 4.74E-02 |
| Fadd          | ILMN_2665625 | NM_145605.1    | 1.55 | 4.40E-02 |
| Tcf25         | ILMN_2769733 | NM_008984.1    | 1.55 | 3.85E-02 |
| Sh3bgrl2      | ILMN_2622804 | NM_174992.3    | 1.55 | 1.18E-02 |
| Pdcd10        | ILMN_2806851 | NM_007783.2    | 1.55 | 1.89E-02 |
| Lincr         | ILMN_1220349 | NM_010112.3    | 1.54 | 1.02E-02 |
| Park7         | ILMN_2728754 | NM_001081297.1 | 1.54 | 4.28E-02 |
| Sema7a        | ILMN_2666526 | NM_133895.1    | 1.54 | 3.51E-02 |
| Skp2          | ILMN_2592285 | NM_025680.3    | 1.54 | 4.69E-02 |

|               |              |                |      |          |
|---------------|--------------|----------------|------|----------|
| Arsj          | ILMN_1237725 | NM_022309.2    | 1.54 | 2.80E-02 |
| Pomp          | ILMN_2625352 | NM_001005506.2 | 1.54 | 1.84E-02 |
| C330016O10Rik | ILMN_2685222 | NM_001077406.1 | 1.54 | 9.66E-03 |
| Ddx17         | ILMN_1234672 | NM_133710.1    | 1.53 | 4.69E-02 |
| Ptpn          | ILMN_1245627 | NM_029793.1    | 1.52 | 3.48E-02 |
| Pygo2         | ILMN_2609568 | NM_134002.1    | 1.52 | 1.99E-02 |
| Cd6           | ILMN_2769330 | NM_007982.1    | 1.52 | 3.97E-02 |
| Sdc1          | ILMN_1228718 | NM_026144.2    | 1.52 | 3.53E-02 |
| Ttc1          | ILMN_2464381 | NM_199146.1    | 1.52 | 4.44E-02 |
| LOC100044322  | ILMN_2417316 | NM_153538.2    | 1.51 | 3.36E-02 |
| Tpra40        | ILMN_2440066 | NM_173737.2    | 1.51 | 3.76E-02 |
| Ppyr1         | ILMN_3001106 | NM_019824.3    | 1.50 | 3.16E-02 |
| Klr1a         | ILMN_2602983 | NM_008959.2    | 1.50 | 2.41E-02 |
| Tbcb          | ILMN_2620061 | NM_007896.3    | 1.50 | 2.79E-02 |
| Numb          | ILMN_2727687 | NM_026960.3    | 1.50 | 3.16E-02 |
| Pmf1          | ILMN_2711410 | NM_025928.3    | 0.66 | 9.40E-03 |
| Hspa9         | ILMN_1222803 | NM_010481.1    | 0.66 | 2.98E-02 |
| Fech          | ILMN_1228534 | NM_007998.5    | 0.66 | 4.70E-02 |
| Cux1          | ILMN_1223862 | NM_009986.3    | 0.66 | 2.90E-02 |
| Gemin6        | ILMN_1214319 | NM_026053.1    | 0.66 | 3.98E-02 |
| Rnf141        | ILMN_1229687 | NM_025999.2    | 0.66 | 3.73E-02 |
| Sgcb          | ILMN_1255256 | NM_011890.4    | 0.66 | 2.80E-02 |
| Rnf138        | ILMN_2683822 | NM_019706.2    | 0.66 | 4.05E-02 |
| 1500041J02Rik | ILMN_2639498 | NM_026424      | 0.66 | 1.80E-02 |
| Fcer1a        | ILMN_2863390 | NM_010184.1    | 0.66 | 1.68E-02 |
| Impad1        | ILMN_1216426 | NM_177730.3    | 0.66 | 4.52E-02 |
| 1500005I02Rik | ILMN_2835694 | NM_028055.1    | 0.65 | 1.90E-02 |
| Aox1          | ILMN_2679131 | NM_009676.2    | 0.65 | 4.71E-02 |



|               |              |                |      |          |
|---------------|--------------|----------------|------|----------|
| Rspo1         | ILMN_2686865 | NM_138683.1    | 0.65 | 2.20E-02 |
| Rab24         | ILMN_2946440 | NM_009000.2    | 0.65 | 3.91E-02 |
| Txnrd3        | ILMN_2453086 | NM_153162.3    | 0.65 | 3.82E-02 |
| Cox6b1        | ILMN_2616405 | NM_025628.2    | 0.65 | 2.27E-02 |
| Itpka         | ILMN_2752431 | NM_146125.1    | 0.65 | 1.88E-02 |
| Glb1l2        | ILMN_2755372 | NM_153803.1    | 0.65 | 3.22E-02 |
| Hfe2          | ILMN_2688089 | NM_027126.2    | 0.65 | 5.00E-02 |
| Spc24         | ILMN_2615709 | NM_026282.4    | 0.65 | 1.23E-02 |
| Dhcr7         | ILMN_2660471 | NM_007856.2    | 0.65 | 3.76E-02 |
| Klf17         | ILMN_2469125 | NM_029416.2    | 0.65 | 3.41E-02 |
| Ndufa5        | ILMN_1216007 | NM_026614.2    | 0.65 | 2.39E-02 |
| Copz2         | ILMN_2878274 | NM_019877.1    | 0.65 | 3.18E-02 |
| Abca6         | ILMN_2965612 | NM_147218.1    | 0.65 | 3.66E-02 |
| Defb8         | ILMN_2814551 | NM_153108.3    | 0.65 | 4.65E-02 |
| Cox6b1        | ILMN_1254971 | NM_025628.2    | 0.64 | 1.89E-02 |
| Fhl1          | ILMN_2780489 | NM_010209.1    | 0.64 | 3.18E-02 |
| Krt26         | ILMN_2765981 | NM_001033397.2 | 0.64 | 1.88E-02 |
| Hadhsc        | ILMN_2661733 | NM_008212.1    | 0.64 | 4.95E-02 |
| Rdh10         | ILMN_2804091 | NM_133832.2    | 0.64 | 1.61E-02 |
| Pdha1         | ILMN_2679851 | NM_008810.2    | 0.64 | 2.43E-02 |
| Ahcy11        | ILMN_1245795 | NM_145542.3    | 0.64 | 4.85E-02 |
| E130309D14Rik | ILMN_3161884 | NM_001013784.1 | 0.64 | 4.94E-02 |
| 6720467C03Rik | ILMN_2837189 | NM_026558.2    | 0.64 | 4.72E-02 |
| A030007L17Rik | ILMN_2864906 | NM_026637.2    | 0.64 | 4.89E-02 |
| Nup85         | ILMN_2890574 | NM_001002929.3 | 0.64 | 4.56E-02 |
| Mrpl10        | ILMN_2822621 | NM_026154.1    | 0.64 | 9.09E-03 |
| BC025920      | ILMN_2918278 | NM_001033363.1 | 0.64 | 1.18E-02 |
| Csf3          | ILMN_2744018 | NM_009971.1    | 0.64 | 3.66E-02 |

|               |              |                |      |          |
|---------------|--------------|----------------|------|----------|
| Pcdhgb6       | ILMN_2722632 | NM_033578.3    | 0.64 | 1.72E-02 |
| Wdr34         | ILMN_1233784 | NM_001008498.2 | 0.63 | 9.07E-03 |
| Zfp606        | ILMN_3135284 | NM_001039951.1 | 0.63 | 7.96E-03 |
| Stra13        | ILMN_1226798 | NM_016665.1    | 0.63 | 2.95E-02 |
| 2310079N02Rik | ILMN_2635801 | NM_025636.3    | 0.63 | 3.98E-02 |
| Tbp           | ILMN_2869461 | NM_013684.2    | 0.63 | 1.18E-02 |
| Dis3l2        | ILMN_2592496 | NM_153530.1    | 0.63 | 1.81E-02 |
| Slmap         | ILMN_2443464 | NM_032008      | 0.63 | 9.45E-03 |
| Mtfmt         | ILMN_2715152 | NM_027134.1    | 0.63 | 2.53E-02 |
| Mcee          | ILMN_2707494 | NM_028626.1    | 0.63 | 3.12E-02 |
| Rbed1         | ILMN_2742244 | NM_144917.4    | 0.63 | 2.59E-02 |
| Pxmp4         | ILMN_2688639 | NM_021534.3    | 0.63 | 3.72E-02 |
| Rpo1-4        | ILMN_2836664 | NM_009088.2    | 0.63 | 3.64E-02 |
| Sc5d          | ILMN_1225039 | NM_172769      | 0.63 | 3.10E-02 |
| Avpr1a        | ILMN_1242999 | NM_016847.2    | 0.63 | 9.84E-03 |
| Ap1s3         | ILMN_2606532 | NM_183027.1    | 0.63 | 2.09E-02 |
| Yy2           | ILMN_2594376 | NM_001098723.1 | 0.63 | 3.73E-02 |
| 2610101N10Rik | ILMN_2719131 | NM_026476.1    | 0.63 | 3.66E-02 |
| Otud7b        | ILMN_3122383 | NM_001025613.1 | 0.63 | 4.01E-02 |
| Dbr1          | ILMN_1254380 | NM_031403.3    | 0.62 | 6.97E-03 |
| Pdzd11        | ILMN_2972646 | NM_028303.1    | 0.62 | 2.84E-02 |
| Fbxo38        | ILMN_1217700 | NM_134136.2    | 0.62 | 1.36E-02 |
| Ppt1          | ILMN_2736168 | NM_008917.2    | 0.62 | 3.33E-02 |
| Anapc13       | ILMN_2796089 | NM_181394.1    | 0.62 | 1.85E-02 |
| Slamf1        | ILMN_2721571 | NM_013730.4    | 0.62 | 2.82E-02 |
| Ppt2          | ILMN_2796869 | NM_019441.2    | 0.62 | 3.61E-02 |
| Hyal1         | ILMN_2644375 | NM_008317.4    | 0.62 | 4.14E-02 |
| Tmem59l       | ILMN_2698911 | NM_182991.2    | 0.62 | 2.18E-02 |

|               |              |                |      |          |
|---------------|--------------|----------------|------|----------|
| Xpnpep3       | ILMN_2642546 | NM_177310.2    | 0.62 | 2.47E-02 |
| Acss2         | ILMN_2734181 | NM_019811.3    | 0.62 | 3.73E-02 |
| Impdh2        | ILMN_2588398 | NM_011830      | 0.62 | 2.82E-02 |
| Rab11b        | ILMN_1259068 | NM_008997.3    | 0.62 | 2.21E-02 |
| Hoxa6         | ILMN_2724039 | NM_010454.1    | 0.62 | 1.23E-02 |
| Acadv1        | ILMN_2956932 | NM_017366.1    | 0.62 | 4.38E-02 |
| Spata2L       | ILMN_1229246 | NM_030176.2    | 0.62 | 3.61E-02 |
| Ctnna3        | ILMN_2834525 | NM_177612.1    | 0.62 | 1.26E-02 |
| Phka2         | ILMN_2725082 | NM_172783.1    | 0.62 | 3.42E-02 |
| Mrpl48        | ILMN_1236131 | NM_198831.2    | 0.62 | 3.06E-02 |
| 0610040J01Rik | ILMN_2915716 | NM_029554.2    | 0.62 | 1.77E-02 |
| Bnip1         | ILMN_2648648 | NM_172149.4    | 0.62 | 4.48E-03 |
| E130014J05Rik | ILMN_2630039 | NM_145989      | 0.62 | 2.47E-02 |
| Rnf5          | ILMN_3161066 | NM_019403.3    | 0.62 | 4.66E-02 |
| Ufc1          | ILMN_2744693 | NM_025388.2    | 0.62 | 3.99E-02 |
| Rnf113a2      | ILMN_1250750 | NM_025525.2    | 0.62 | 4.34E-02 |
| Gphn          | ILMN_2910990 | NM_172952.1    | 0.61 | 4.67E-02 |
| Tdrd3         | ILMN_3075157 | NM_172605.2    | 0.61 | 4.86E-02 |
| Il15ra        | ILMN_1220603 | NM_133836.1    | 0.61 | 4.25E-02 |
| Ralgps2       | ILMN_2884869 | NM_023884.2    | 0.61 | 3.53E-02 |
| Aifm2         | ILMN_1216842 | NM_001039194.2 | 0.61 | 3.97E-02 |
| Ppm1g         | ILMN_2643832 | NM_008014.3    | 0.61 | 1.52E-02 |
| Cox17         | ILMN_3160517 | NM_001017429.2 | 0.61 | 2.27E-02 |
| Mllt3         | ILMN_3035795 | NM_027326.3    | 0.61 | 1.89E-02 |
| Gfra4         | ILMN_2738522 | NM_020014.1    | 0.61 | 2.15E-03 |
| Atad4         | ILMN_1246558 | NM_146026.1    | 0.61 | 1.49E-02 |
| Phc1          | ILMN_3142248 | NM_007905.2    | 0.61 | 1.44E-02 |
| Ift20         | ILMN_2592093 | NM_018854.3    | 0.61 | 4.46E-02 |

|               |              |                |      |          |
|---------------|--------------|----------------|------|----------|
| Tmem135       | ILMN_2669991 | NM_028343.3    | 0.61 | 3.41E-02 |
| Nipa1         | ILMN_2705349 | NM_153578.2    | 0.61 | 1.69E-02 |
| 1810030N24Rik | ILMN_2873180 | NM_025471.1    | 0.61 | 2.42E-02 |
| Setdb2        | ILMN_1228453 | NM_001081024.1 | 0.61 | 3.90E-02 |
| LOC100047606  | ILMN_2675199 | XR_033719.1    | 0.61 | 6.25E-03 |
| 9030025P20Rik | ILMN_2716783 | NM_001039552.1 | 0.61 | 2.28E-02 |
| Akap9         | ILMN_2678495 | NM_194462.2    | 0.61 | 5.92E-03 |
| Hnrph1        | ILMN_2684987 | NM_021510.2    | 0.61 | 4.09E-02 |
| Ssr3          | ILMN_2838645 | NM_026155.1    | 0.61 | 7.91E-03 |
| Atp2a1        | ILMN_2666864 | NM_007504.2    | 0.61 | 1.13E-02 |
| Ak2           | ILMN_2641360 | NM_001033966.3 | 0.61 | 4.83E-02 |
| Fahd2a        | ILMN_1214593 | NM_029629.1    | 0.61 | 2.84E-02 |
| Cd9912        | ILMN_1230457 | NM_138309.2    | 0.61 | 3.35E-02 |
| Eif2b1        | ILMN_2600508 | NM_145371.1    | 0.61 | 3.19E-02 |
| D10Jhu81e     | ILMN_2991545 | NM_138601.1    | 0.61 | 1.89E-02 |
| Dap3          | ILMN_2722542 | NM_022994.2    | 0.61 | 9.14E-03 |
| Slc1a7        | ILMN_2707789 | NM_146255.1    | 0.61 | 6.59E-03 |
| Mrps28        | ILMN_2752224 | NM_025434.2    | 0.61 | 4.63E-02 |
| Gpr180        | ILMN_3161518 | NM_021434.4    | 0.61 | 2.78E-02 |
| Lsm8          | ILMN_2883907 | NM_133939.1    | 0.61 | 2.46E-02 |
| Agxt2l2       | ILMN_1228943 | NM_028398.2    | 0.61 | 3.29E-02 |
| Clec9a        | ILMN_2929768 | NM_172732.2    | 0.60 | 3.56E-02 |
| Ccdc44        | ILMN_1219565 | NM_027346.1    | 0.60 | 2.09E-02 |
| 1810037C20Rik | ILMN_2724415 | NM_025473.2    | 0.60 | 1.53E-02 |
| Max           | ILMN_3068231 | NM_008558.1    | 0.60 | 2.59E-02 |
| Hist1h2bm     | ILMN_2891646 | NM_178200.1    | 0.60 | 4.46E-02 |
| Sdhd          | ILMN_2592389 | NM_023374.3    | 0.60 | 1.80E-02 |
| Bfar          | ILMN_2987995 | NM_025976.1    | 0.60 | 1.87E-02 |

|               |              |                |      |          |
|---------------|--------------|----------------|------|----------|
| Sds           | ILMN_1255497 | NM_145565.1    | 0.60 | 1.76E-03 |
| Scp2          | ILMN_2705886 | NM_011327.2    | 0.60 | 2.13E-02 |
| 2310037I24Rik | ILMN_2625058 | NM_133714.4    | 0.60 | 4.43E-02 |
| Mas1          | ILMN_1253860 | NM_008552.3    | 0.60 | 3.07E-02 |
| Ndufa7        | ILMN_2629044 | NM_023202.3    | 0.60 | 1.20E-02 |
| Ndufc1        | ILMN_1229975 | NM_025523.1    | 0.60 | 2.41E-02 |
| Nme7          | ILMN_2635105 | NM_138314.2    | 0.60 | 1.68E-02 |
| Nhej1         | ILMN_2991107 | NM_029342.3    | 0.60 | 4.31E-02 |
| Dak           | ILMN_1246429 | NM_145496.1    | 0.60 | 3.87E-02 |
| Rabgap11      | ILMN_1214241 | NM_013862.4    | 0.60 | 1.57E-02 |
| Sra1          | ILMN_2876554 | NM_025291.1    | 0.60 | 2.16E-02 |
| Stxbp51       | ILMN_3000703 | NM_172440.1    | 0.60 | 1.57E-02 |
| Zdhhc13       | ILMN_1215722 | NM_028031.1    | 0.60 | 1.80E-02 |
| Chrd          | ILMN_2765047 | NM_009893.1    | 0.60 | 3.26E-02 |
| Mef2c         | ILMN_1214950 | NM_025282.2    | 0.60 | 2.99E-02 |
| 1110012L19Rik | ILMN_3144761 | NM_026787.1    | 0.60 | 2.56E-02 |
| Mboat2        | ILMN_1229343 | NM_001083341.1 | 0.60 | 4.74E-02 |
| 1700088E04Rik | ILMN_1239196 | NM_138581.2    | 0.60 | 1.49E-02 |
| Entpd4        | ILMN_2589312 | NM_026174.2    | 0.59 | 3.36E-02 |
| Hfe           | ILMN_2592519 | NM_010424.4    | 0.59 | 4.90E-02 |
| Aes           | ILMN_2808336 | NM_010347.2    | 0.59 | 3.64E-02 |
| Klf15         | ILMN_1235255 | NM_023184.3    | 0.59 | 2.78E-02 |
| Bex4          | ILMN_3118584 | NM_212457.1    | 0.59 | 3.16E-03 |
| Arl16         | ILMN_1231868 | NM_197995.2    | 0.59 | 3.94E-02 |
| l7Rn6         | ILMN_3162224 | NM_026304.2    | 0.59 | 1.12E-02 |
| Cd28          | ILMN_2589871 | NM_007642.2    | 0.59 | 3.05E-02 |
| Nudt6         | ILMN_1253773 | NM_153561.2    | 0.59 | 3.60E-02 |
| Hbs11         | ILMN_1229378 | NM_019702.2    | 0.59 | 9.84E-03 |

|               |              |                |      |          |
|---------------|--------------|----------------|------|----------|
| Pccb          | ILMN_2875938 | NM_025835.1    | 0.59 | 1.87E-02 |
| 1110018J18Rik | ILMN_2674655 | NM_025370.2    | 0.59 | 2.78E-02 |
| Chrm2         | ILMN_2971508 | NM_203491.1    | 0.59 | 1.06E-02 |
| Rpusd4        | ILMN_2718974 | NM_028040.2    | 0.59 | 1.89E-02 |
| Ubac1         | ILMN_2431046 | NM_133835.1    | 0.59 | 1.31E-02 |
| Hint1         | ILMN_2723631 | NM_008248.2    | 0.59 | 9.14E-03 |
| Mdh1          | ILMN_2655677 | NM_008618.2    | 0.59 | 3.95E-02 |
| Vps35         | ILMN_2844784 | NM_022997.2    | 0.59 | 1.40E-02 |
| 2010012O05Rik | ILMN_2748300 | NM_025563.3    | 0.59 | 2.92E-02 |
| 1110049F12Rik | ILMN_1255697 | NM_025411.3    | 0.59 | 1.71E-02 |
| Sdf4          | ILMN_2726315 | NM_011341.4    | 0.59 | 2.25E-02 |
| Tctex1d2      | ILMN_2720925 | NM_025329.3    | 0.59 | 1.98E-02 |
| 1810030N24Rik | ILMN_1246756 | NM_025471.2    | 0.59 | 3.33E-02 |
| Ank3          | ILMN_2622306 | NM_170687.3    | 0.59 | 5.13E-03 |
| 2310045A20Rik | ILMN_2663281 | NM_172710.3    | 0.59 | 2.12E-02 |
| Edg7          | ILMN_3009440 | NM_022983.2    | 0.59 | 7.37E-03 |
| Asb3          | ILMN_2663555 | NM_023906.3    | 0.59 | 3.91E-02 |
| Irf6          | ILMN_1216279 | NM_016851.2    | 0.58 | 2.53E-02 |
| Hrsp12        | ILMN_2610706 | NM_008287.2    | 0.58 | 1.54E-02 |
| Commd1        | ILMN_1231658 | NM_144514.2    | 0.58 | 9.03E-04 |
| Pbx3          | ILMN_2642147 | NM_016768.1    | 0.58 | 9.87E-03 |
| Osbp12        | ILMN_1259132 | NM_144500.3    | 0.58 | 1.80E-02 |
| Birc2         | ILMN_2741621 | NM_007465.1    | 0.58 | 2.50E-03 |
| Slc35a1       | ILMN_2702767 | NM_011895.2    | 0.58 | 1.58E-02 |
| Fen1          | ILMN_1259473 | NM_007999.3    | 0.58 | 3.61E-02 |
| Hbs11         | ILMN_3139405 | NM_001042593.1 | 0.58 | 1.03E-02 |
| Blm           | ILMN_3150996 | NM_001042527.1 | 0.58 | 4.90E-02 |
| Opn4          | ILMN_2689040 | NM_013887.1    | 0.58 | 1.63E-02 |

|               |              |                |      |          |
|---------------|--------------|----------------|------|----------|
| Arl6ip2       | ILMN_3138157 | NM_019717.2    | 0.58 | 2.49E-02 |
| Nudt2         | ILMN_1259148 | NM_025539.2    | 0.58 | 3.47E-02 |
| Cops7a        | ILMN_2875812 | NM_012003.1    | 0.58 | 6.70E-03 |
| Zmpste24      | ILMN_2435079 | NM_172700.2    | 0.58 | 3.07E-02 |
| Osbpl6        | ILMN_1221789 | NM_145525.2    | 0.58 | 1.96E-02 |
| 2810003C17Rik | ILMN_2741063 | NM_145144.1    | 0.58 | 3.54E-02 |
| B3gnt1        | ILMN_1257876 | NM_175383.2    | 0.58 | 3.50E-02 |
| Map2k4        | ILMN_2920549 | NM_009157.2    | 0.58 | 5.39E-03 |
| Myocd         | ILMN_3072880 | NM_145136.2    | 0.58 | 2.65E-02 |
| Wbp1          | ILMN_2951120 | NM_016757.1    | 0.58 | 3.81E-03 |
| Slc7a4        | ILMN_2639360 | NM_144852.3    | 0.58 | 3.87E-02 |
| Fahd2a        | ILMN_1245115 | NM_029629.1    | 0.57 | 1.20E-02 |
| Rabggtb       | ILMN_2589819 | NM_011231.1    | 0.57 | 4.15E-03 |
| Snrpg         | ILMN_2975640 | NM_026506.1    | 0.57 | 9.65E-04 |
| Armc8         | ILMN_2735080 | NM_028768.2    | 0.57 | 3.14E-02 |
| Topors        | ILMN_2442075 | NM_134097.3    | 0.57 | 3.11E-02 |
| Ndufb6        | ILMN_1242233 | NM_001033305.2 | 0.57 | 6.54E-03 |
| Sec61a2       | ILMN_2655668 | NM_021305.3    | 0.57 | 4.15E-03 |
| Ccdc28a       | ILMN_2619718 | NM_144820.3    | 0.57 | 3.91E-02 |
| Synj2bp       | ILMN_1252068 | NM_025292.4    | 0.57 | 4.43E-02 |
| Orai3         | ILMN_1260367 | NM_198424.3    | 0.57 | 5.73E-03 |
| Furin         | ILMN_3148489 | NM_011046.2    | 0.57 | 3.16E-02 |
| Slu7          | ILMN_1237003 | NM_148673.3    | 0.57 | 6.87E-03 |
| Cd207         | ILMN_2785648 | NM_144943.2    | 0.57 | 3.05E-02 |
| Smcr7         | ILMN_2995370 | NM_001009927.1 | 0.57 | 4.54E-02 |
| Uqcrc2        | ILMN_2435140 | NM_025899.2    | 0.57 | 4.20E-02 |
| Aaas          | ILMN_2686898 | NM_153416.1    | 0.57 | 3.07E-02 |
| Khdrbs1       | ILMN_1256052 | NM_011317.3    | 0.57 | 8.99E-03 |

|              |              |                |      |          |
|--------------|--------------|----------------|------|----------|
| Echs1        | ILMN_2888181 | NM_053119.1    | 0.57 | 1.53E-02 |
| Etfa         | ILMN_2649966 | NM_145615.3    | 0.57 | 3.42E-02 |
| Atp6ap2      | ILMN_2725286 | NM_027439.3    | 0.57 | 4.04E-02 |
| Iqgap2       | ILMN_2908846 | NM_027711.1    | 0.57 | 1.93E-03 |
| Armc8        | ILMN_1230072 | NM_028768.2    | 0.57 | 1.87E-02 |
| Rpo2tc1      | ILMN_2590860 | NM_011294.2    | 0.57 | 5.04E-03 |
| Mapk9        | ILMN_2591066 | NM_016961.2    | 0.57 | 1.66E-02 |
| Lsm14b       | ILMN_2782663 | NM_177727.2    | 0.57 | 2.91E-02 |
| Rhobtb3      | ILMN_1221243 | NM_028493.2    | 0.57 | 2.46E-02 |
| Vdac1        | ILMN_2832808 | NM_011694.1    | 0.57 | 7.04E-03 |
| Anxa6        | ILMN_2878060 | NM_013472.2    | 0.57 | 2.28E-02 |
| Scey1        | ILMN_2613399 | NM_007926.2    | 0.57 | 2.17E-02 |
| Foxred1      | ILMN_2832884 | NM_172291.1    | 0.57 | 1.01E-02 |
| Extl2        | ILMN_1213855 | NM_021388.3    | 0.57 | 3.98E-02 |
| LOC100044294 | ILMN_1234172 | XM_001471475.1 | 0.57 | 1.39E-02 |
| Nme4         | ILMN_1244161 | NM_019731.1    | 0.57 | 4.86E-02 |
| Nup88        | ILMN_3034381 | NM_172394.2    | 0.57 | 4.16E-02 |
| Lsm14b       | ILMN_2613313 | NM_177727.4    | 0.57 | 2.77E-02 |
| Pcca         | ILMN_2674924 | NM_144844.1    | 0.57 | 1.58E-02 |
| Mapk1        | ILMN_2601071 | NM_011949.3    | 0.57 | 1.89E-02 |
| Sec23a       | ILMN_1213958 | NM_009147.2    | 0.56 | 3.35E-02 |
| Mrrf         | ILMN_2940766 | NM_026422.1    | 0.56 | 4.94E-02 |
| Podxl2       | ILMN_2836312 | NM_176973.3    | 0.56 | 2.46E-02 |
| Rock2        | ILMN_1248041 | NM_009072.2    | 0.56 | 4.95E-02 |
| Rbm4         | ILMN_2769133 | NM_009032.2    | 0.56 | 7.70E-03 |
| Accn2        | ILMN_2643241 | NM_009597.1    | 0.56 | 7.42E-03 |
| Idh3b        | ILMN_1235050 | NM_130884.3    | 0.56 | 9.49E-03 |
| Dbi          | ILMN_3150159 | NM_007830.3    | 0.56 | 3.75E-02 |



|               |              |                |      |          |
|---------------|--------------|----------------|------|----------|
| Atp5s         | ILMN_2642158 | NM_026536.1    | 0.56 | 6.59E-03 |
| 1810021J13Rik | ILMN_2639402 | NM_025464.2    | 0.56 | 9.11E-03 |
| 0610010K14Rik | ILMN_2674228 | NM_026757.1    | 0.56 | 1.13E-02 |
| Dclre1b       | ILMN_2638404 | NM_133865.2    | 0.56 | 1.32E-02 |
| Pnpla7        | ILMN_2695047 | NM_146251.3    | 0.56 | 2.76E-02 |
| Prkce         | ILMN_2993204 | NM_011104.1    | 0.56 | 1.54E-02 |
| Esrra         | ILMN_2972292 | NM_007953.2    | 0.56 | 4.23E-02 |
| Ctnna1        | ILMN_2780205 | NM_009818.1    | 0.56 | 7.44E-03 |
| Rpo1-4        | ILMN_2700107 | NM_009088.2    | 0.56 | 3.41E-02 |
| Cog6          | ILMN_1219661 | NM_026225.2    | 0.56 | 1.84E-02 |
| 1700034H14Rik | ILMN_2897476 | NM_025969.1    | 0.56 | 4.85E-02 |
| Rps7          | ILMN_2916116 | NM_011300.2    | 0.56 | 2.96E-03 |
| Ercc5         | ILMN_2769261 | NM_011729.1    | 0.56 | 2.20E-02 |
| Scrn1         | ILMN_1241383 | NM_027268      | 0.56 | 7.37E-03 |
| Mcrs1         | ILMN_1257515 | NM_016766.2    | 0.56 | 2.46E-02 |
| Fahd2a        | ILMN_2882425 | NM_029629.1    | 0.56 | 2.18E-03 |
| Arl6ip2       | ILMN_3060766 | NM_019717.2    | 0.56 | 1.19E-02 |
| Fchsd2        | ILMN_2798086 | NM_199012.1    | 0.56 | 4.24E-03 |
| Tmtc4         | ILMN_2897110 | NM_028651.1    | 0.56 | 1.13E-02 |
| 2300002D11Rik | ILMN_3119914 | NM_001081156.1 | 0.55 | 3.35E-02 |
| Lifr          | ILMN_2829015 | NM_013584.1    | 0.55 | 1.23E-02 |
| Trim23        | ILMN_2879225 | NM_030731.1    | 0.55 | 3.72E-02 |
| Vamp8         | ILMN_2499400 | NM_016794.2    | 0.55 | 3.28E-02 |
| Suox          | ILMN_2912532 | NM_173733.2    | 0.55 | 1.10E-02 |
| Dnajc5b       | ILMN_2619505 | NM_025489.2    | 0.55 | 1.35E-02 |
| 1700034H14Rik | ILMN_2684388 | NM_025969.3    | 0.55 | 1.63E-02 |
| Mrp63         | ILMN_2790113 | NM_026401.1    | 0.55 | 1.61E-02 |
| Eprs          | ILMN_3069857 | NM_029735.1    | 0.55 | 7.52E-03 |

|               |              |                |      |          |
|---------------|--------------|----------------|------|----------|
| Ndufa12       | ILMN_1220362 | NM_025551.3    | 0.55 | 2.33E-03 |
| Ufsp2         | ILMN_2717569 | NM_138668.1    | 0.55 | 2.88E-02 |
| Oat           | ILMN_2933112 | NM_016978.1    | 0.55 | 2.07E-02 |
| Trp53bp2      | ILMN_2419247 | NM_173378.2    | 0.55 | 6.41E-03 |
| Tmco7         | ILMN_1241914 | NM_173037.1    | 0.55 | 1.66E-02 |
| Ptp4a3        | ILMN_1226848 | NM_008975.2    | 0.55 | 3.24E-02 |
| Crybb1        | ILMN_2702122 | NM_023695.2    | 0.55 | 9.66E-03 |
| Coq9          | ILMN_2774456 | NM_026452.2    | 0.55 | 1.53E-02 |
| Tg            | ILMN_2658878 | NM_009375.2    | 0.55 | 7.37E-03 |
| Acadm         | ILMN_2810473 | NM_007382.1    | 0.55 | 4.11E-03 |
| Agtpbp1       | ILMN_3117612 | NM_001048008.1 | 0.55 | 1.21E-03 |
| Asph          | ILMN_2606990 | NM_023066.2    | 0.55 | 4.94E-02 |
| Yif1b         | ILMN_2607609 | NM_029887.2    | 0.55 | 9.19E-03 |
| Nedd4l        | ILMN_2878501 | NM_031881.1    | 0.54 | 1.16E-02 |
| Suc1g2        | ILMN_3122427 | NM_011507.1    | 0.54 | 6.02E-03 |
| Pigp          | ILMN_2592239 | NM_019543.2    | 0.54 | 3.53E-02 |
| Adnp          | ILMN_2805261 | NM_009628.2    | 0.54 | 2.62E-02 |
| Rnf11         | ILMN_2654403 | NM_013876.3    | 0.54 | 3.00E-02 |
| Flot2         | ILMN_3152380 | NM_001040403.1 | 0.54 | 3.54E-02 |
| Scp2          | ILMN_2705881 | NM_011327.1    | 0.54 | 2.35E-03 |
| Gnpat         | ILMN_2605941 | NM_010322.2    | 0.54 | 8.91E-03 |
| 2310003L22Rik | ILMN_2747677 | NM_027093.3    | 0.54 | 3.37E-02 |
| 5330431N19Rik | ILMN_1237049 | NM_172639.2    | 0.54 | 4.05E-02 |
| Cml3          | ILMN_2735046 | NM_053097.1    | 0.54 | 6.48E-03 |
| 2410166I05Rik | ILMN_2629718 | NM_029759.2    | 0.54 | 3.66E-02 |
| Gatad1        | ILMN_2594205 | NM_026033.1    | 0.54 | 4.27E-02 |
| Pmvk          | ILMN_1227596 | NM_026784.2    | 0.54 | 4.20E-03 |
| Hint3         | ILMN_2972627 | NM_025798.2    | 0.54 | 1.56E-02 |

|               |              |                |      |          |
|---------------|--------------|----------------|------|----------|
| Pcca          | ILMN_2921698 | NM_144844.1    | 0.54 | 4.84E-02 |
| 1110018J18Rik | ILMN_2647669 | NM_025370.2    | 0.54 | 2.17E-03 |
| Plec1         | ILMN_2602697 | NM_201385.1    | 0.54 | 1.23E-03 |
| Cs            | ILMN_1241236 | NM_026444.3    | 0.54 | 1.56E-03 |
| Avpi1         | ILMN_2755585 | NM_027106.3    | 0.54 | 1.61E-02 |
| Uros          | ILMN_2498173 | NM_009479.2    | 0.54 | 3.70E-02 |
| Pex7          | ILMN_2739123 | NM_008822.1    | 0.54 | 2.49E-03 |
| Ndufb7        | ILMN_2717460 | NM_025843.3    | 0.54 | 3.70E-02 |
| Thtpa         | ILMN_2794825 | NM_153083.2    | 0.54 | 5.13E-03 |
| Nudc          | ILMN_1249749 | NM_010948.1    | 0.54 | 1.20E-02 |
| Asah1         | ILMN_2629591 | NM_019734.1    | 0.54 | 4.53E-02 |
| Jam2          | ILMN_2790839 | NM_023844.2    | 0.54 | 4.13E-03 |
| 5830468K18Rik | ILMN_2688721 | NM_172644      | 0.54 | 1.55E-02 |
| Pdzd11        | ILMN_2972645 | NM_028303.1    | 0.54 | 8.14E-03 |
| Cxxc4         | ILMN_3123909 | NM_001004367.2 | 0.54 | 1.50E-02 |
| Kbtbd4        | ILMN_2806291 | NM_025991.1    | 0.54 | 1.98E-02 |
| 2610034E13Rik | ILMN_2612091 | NM_029365      | 0.54 | 2.12E-02 |
| Sfxn5         | ILMN_2632073 | NM_178639.2    | 0.54 | 1.61E-02 |
| Cldn10        | ILMN_2515816 | NM_021386.3    | 0.54 | 1.24E-02 |
| D8Ert738e     | ILMN_2820559 | NM_001007571.1 | 0.54 | 1.68E-02 |
| 1200003C05Rik | ILMN_2943319 | NM_024205.1    | 0.54 | 1.04E-02 |
| Sorcs2        | ILMN_2695085 | NM_030889.2    | 0.54 | 1.95E-03 |
| LOC100048613  | ILMN_2647188 | XM_001480380.1 | 0.54 | 2.70E-03 |
| Phka2         | ILMN_2725083 | NM_172783.2    | 0.54 | 2.22E-03 |
| Camk2g        | ILMN_2765196 | NM_178597.4    | 0.54 | 4.91E-03 |
| 1300018J18Rik | ILMN_2687854 | NM_027905.2    | 0.54 | 8.36E-04 |
| Grc10         | ILMN_2722678 | NM_013535.1    | 0.54 | 4.25E-03 |
| Rab4a         | ILMN_1212902 | NM_009003.2    | 0.53 | 1.66E-03 |

|               |              |                |      |          |
|---------------|--------------|----------------|------|----------|
| Etv1          | ILMN_2649709 | NM_007960.1    | 0.53 | 4.12E-02 |
| Rdm1          | ILMN_1218934 | NM_025654.2    | 0.53 | 1.10E-02 |
| Ggnbp1        | ILMN_2960522 | NM_027544.1    | 0.53 | 3.58E-02 |
| Kcna2         | ILMN_2727857 | NM_008417.3    | 0.53 | 1.74E-02 |
| Imp3          | ILMN_2593208 | NM_133976.1    | 0.53 | 4.14E-03 |
| Xpa           | ILMN_2968515 | NM_011728.1    | 0.53 | 1.82E-02 |
| Senp7         | ILMN_2706451 | NM_001003971.1 | 0.53 | 4.04E-02 |
| Gab1          | ILMN_1222009 | NM_021356.2    | 0.53 | 3.96E-03 |
| Rgs6          | ILMN_1235475 | NM_015812.3    | 0.53 | 1.39E-03 |
| Jph1          | ILMN_1217728 | NM_020604.1    | 0.53 | 2.78E-02 |
| Cox7b         | ILMN_2671689 | NM_025379.2    | 0.53 | 4.74E-02 |
| Ddo           | ILMN_1238706 | NM_027442.4    | 0.53 | 5.10E-03 |
| C030006K11Rik | ILMN_2692853 | NM_145472.1    | 0.53 | 1.64E-02 |
| Asb12         | ILMN_2965123 | NM_080858.1    | 0.53 | 3.14E-02 |
| Hsd3b7        | ILMN_3114124 | NM_133943.2    | 0.53 | 4.40E-02 |
| Psmc1         | ILMN_2986309 | NM_011189.1    | 0.53 | 3.46E-02 |
| Eif2b1        | ILMN_1215242 | NM_145371.3    | 0.53 | 1.71E-02 |
| Ulk1          | ILMN_2506115 | NM_009469.3    | 0.53 | 3.24E-02 |
| Man2a2        | ILMN_2650255 | NM_172903.3    | 0.53 | 8.55E-03 |
| 1190007F08Rik | ILMN_2893564 | NM_001033144.1 | 0.53 | 5.02E-03 |
| Rab9          | ILMN_1258125 | NM_019773.1    | 0.53 | 1.94E-03 |
| 1700034H14Rik | ILMN_2685133 | NM_025969.3    | 0.53 | 5.99E-03 |
| Hic2          | ILMN_2677332 | NM_178922.3    | 0.53 | 3.51E-02 |
| Stk39         | ILMN_2751494 | NM_016866.2    | 0.53 | 4.80E-02 |
| Dir2          | ILMN_1224927 | NM_153550.3    | 0.53 | 1.36E-03 |
| 9030224M15Rik | ILMN_1255780 | NM_177793.3    | 0.53 | 4.13E-03 |
| Hsd3b7        | ILMN_1260456 | NM_133943.2    | 0.53 | 6.89E-03 |
| Rapgef4       | ILMN_2945940 | NM_019688.1    | 0.53 | 3.47E-02 |

|               |              |                |      |          |
|---------------|--------------|----------------|------|----------|
| Cdk2          | ILMN_2770759 | NM_183417.2    | 0.53 | 8.10E-03 |
| Tmem126a      | ILMN_2803627 | NM_025460.1    | 0.53 | 6.02E-03 |
| LOC329575     | ILMN_3144820 | NM_001024849.1 | 0.53 | 3.71E-02 |
| Acad9         | ILMN_2656805 | NM_172678.2    | 0.53 | 2.69E-03 |
| Atp8a1        | ILMN_1246298 | NM_009727.2    | 0.53 | 1.18E-02 |
| 2610204L23Rik | ILMN_2706057 | NM_026009.1    | 0.53 | 9.01E-03 |
| LOC100047155  | ILMN_2732827 | XM_001477537.1 | 0.53 | 3.01E-02 |
| Ccdc47        | ILMN_2706051 | NM_026009.2    | 0.53 | 5.07E-03 |
| Paip2b        | ILMN_3005212 | NM_146169.1    | 0.52 | 9.30E-03 |
| Tmem38b       | ILMN_2795792 | NM_028053.1    | 0.52 | 1.00E-02 |
| Cyp4b1        | ILMN_2790496 | NM_007823.2    | 0.52 | 3.48E-02 |
| Jtb           | ILMN_1226138 | NM_206924.2    | 0.52 | 2.49E-03 |
| Gemin6        | ILMN_2631813 | NM_026053.1    | 0.52 | 6.19E-03 |
| Peo1          | ILMN_1243077 | NM_153796.3    | 0.52 | 3.64E-02 |
| Acot3         | ILMN_2644827 | NM_134246.3    | 0.52 | 1.07E-02 |
| Atp51         | ILMN_2973897 | NM_013795.4    | 0.52 | 9.07E-03 |
| Ncoa4         | ILMN_3132361 | NM_001033988.1 | 0.52 | 2.59E-02 |
| 1190003M12Rik | ILMN_2856588 | NM_026860.1    | 0.52 | 1.86E-03 |
| Cidec         | ILMN_1222679 | NM_178373.3    | 0.52 | 5.67E-03 |
| Slc25a16      | ILMN_2822071 | NM_175194.2    | 0.52 | 3.02E-02 |
| Mkks          | ILMN_1257332 | NM_021527.1    | 0.52 | 9.79E-04 |
| Gca           | ILMN_2733482 | NM_145523.3    | 0.52 | 4.59E-03 |
| Psmc3ip       | ILMN_2999654 | NM_008949.2    | 0.52 | 7.04E-03 |
| Atp5j         | ILMN_2611261 | NM_016755.2    | 0.52 | 1.19E-02 |
| Setd6         | ILMN_1223358 | NM_001035123.3 | 0.52 | 3.57E-02 |
| Cgrrf1        | ILMN_2635850 | NM_026832.3    | 0.52 | 3.34E-02 |
| Aff1          | ILMN_3154640 | NM_133919.3    | 0.52 | 1.26E-02 |
| Eno3          | ILMN_2757569 | NM_007933.2    | 0.52 | 3.21E-02 |

|               |              |                |      |          |
|---------------|--------------|----------------|------|----------|
| Pkig          | ILMN_3090731 | NM_001039391.1 | 0.52 | 5.20E-03 |
| Klhl21        | ILMN_1229082 | NM_001033352.3 | 0.52 | 2.50E-02 |
| Mapk14        | ILMN_2721809 | NM_011951.2    | 0.52 | 6.59E-03 |
| 0610006I08Rik | ILMN_2896528 | NM_025791.1    | 0.52 | 3.87E-02 |
| Rab3a         | ILMN_2991912 | NM_009001.3    | 0.52 | 2.32E-02 |
| BC026585      | ILMN_1221257 | XM_129546.2    | 0.52 | 3.33E-02 |
| Zfp810        | ILMN_1231164 | NM_145612.2    | 0.52 | 4.67E-02 |
| Flot2         | ILMN_1227357 | NM_008028.2    | 0.52 | 1.89E-02 |
| Aph1b         | ILMN_2588682 | NM_177583.4    | 0.52 | 4.22E-03 |
| Mboat5        | ILMN_1237328 | NM_145130.1    | 0.52 | 1.28E-03 |
| Cdk2          | ILMN_2717613 | NM_016756.1    | 0.52 | 1.47E-02 |
| Cog6          | ILMN_2974945 | NM_026225.1    | 0.52 | 1.93E-02 |
| 1200003C05Rik | ILMN_1223051 | NM_024205.1    | 0.52 | 8.81E-03 |
| Mrps33        | ILMN_1214937 | NM_010270.2    | 0.52 | 2.50E-03 |
| Uchl5         | ILMN_1226422 | NM_019562.1    | 0.51 | 2.09E-02 |
| Eprs          | ILMN_3148398 | NM_029735.1    | 0.51 | 2.57E-02 |
| Banf1         | ILMN_2745971 | NM_011793.2    | 0.51 | 2.39E-02 |
| Asf1a         | ILMN_1239345 | NM_025541.3    | 0.51 | 8.51E-03 |
| Ilvbl         | ILMN_2844370 | NM_173751.3    | 0.51 | 3.71E-02 |
| Fgfr1op2      | ILMN_2628188 | NM_026218.2    | 0.51 | 1.12E-02 |
| Lgi1          | ILMN_2740419 | NM_020278.2    | 0.51 | 6.01E-04 |
| 2410137M14Rik | ILMN_2739645 | NM_029747.2    | 0.51 | 3.49E-02 |
| Mrvi1         | ILMN_2746283 | NM_194464.2    | 0.51 | 1.01E-02 |
| Ifngr2        | ILMN_2784272 | NM_008338.2    | 0.51 | 4.49E-02 |
| Nsmce2        | ILMN_1255898 | NM_026746.2    | 0.51 | 6.21E-03 |
| Tlcd1         | ILMN_2781458 | NM_026708.1    | 0.51 | 7.30E-03 |
| Krr1          | ILMN_1258846 | NM_178610.3    | 0.51 | 7.10E-03 |
| Capn7         | ILMN_2675535 | NM_009796.2    | 0.51 | 6.25E-03 |

|               |              |                |      |          |
|---------------|--------------|----------------|------|----------|
| Cox6b2        | ILMN_2764551 | NM_183405.1    | 0.51 | 6.49E-03 |
| Nqo2          | ILMN_2968729 | NM_020282.2    | 0.51 | 2.20E-03 |
| Stxbp4        | ILMN_2753444 | NM_011505.1    | 0.51 | 2.13E-03 |
| Smyd3         | ILMN_1231094 | NM_027188.3    | 0.51 | 1.31E-02 |
| Egln1         | ILMN_2617090 | NM_053207.1    | 0.51 | 1.61E-02 |
| 2810403A07Rik | ILMN_1227212 | NM_028814.2    | 0.51 | 5.82E-03 |
| Ak3           | ILMN_2791121 | NM_021299.1    | 0.51 | 1.58E-02 |
| Calr3         | ILMN_1232231 | NM_029782.3    | 0.51 | 1.16E-02 |
| Cutc          | ILMN_2686087 | NM_025530.2    | 0.51 | 2.64E-02 |
| Tmem47        | ILMN_3124787 | NM_138751.1    | 0.51 | 1.19E-02 |
| A030007L17Rik | ILMN_2623886 | NM_026637.3    | 0.51 | 1.44E-02 |
| Zadh2         | ILMN_1232404 | NM_146090.4    | 0.51 | 2.87E-03 |
| Lysmd4        | ILMN_2701435 | NM_175215.3    | 0.51 | 2.49E-02 |
| LOC100045617  | ILMN_2613641 | XM_001474613.1 | 0.51 | 3.73E-02 |
| Fert2         | ILMN_3080371 | NM_001037997.1 | 0.51 | 2.04E-02 |
| Krba1         | ILMN_2876712 | NM_133922.2    | 0.51 | 1.57E-02 |
| Pde7b         | ILMN_2747728 | NM_013875.2    | 0.51 | 1.80E-02 |
| Ubl5          | ILMN_2469689 | NM_025401.3    | 0.51 | 1.19E-03 |
| Nup133        | ILMN_2654013 | NM_172288.1    | 0.51 | 1.10E-03 |
| Wnt5a         | ILMN_2472917 | NM_009524.2    | 0.51 | 1.33E-03 |
| Rad1          | ILMN_2671447 | NM_011232.2    | 0.51 | 1.05E-02 |
| Phpt1         | ILMN_2626143 | NM_029293.2    | 0.51 | 4.49E-03 |
| Cbx5          | ILMN_3055904 | NM_001076789.1 | 0.51 | 6.87E-04 |
| Adra1a        | ILMN_1259043 | NM_013461.3    | 0.51 | 4.60E-03 |
| Zmpste24      | ILMN_2471634 | NM_172700.2    | 0.50 | 1.68E-02 |
| Tmem41b       | ILMN_2738090 | NM_153525.5    | 0.50 | 1.80E-02 |
| Echdc2        | ILMN_2687040 | NM_026728.2    | 0.50 | 2.94E-03 |
| Rars2         | ILMN_2857581 | NM_181406.2    | 0.50 | 9.66E-03 |

|               |              |                |      |          |
|---------------|--------------|----------------|------|----------|
| Hspb2         | ILMN_2613904 | NM_024441.1    | 0.50 | 4.24E-03 |
| Pex11a        | ILMN_2700265 | NM_011068.1    | 0.50 | 2.99E-02 |
| D19Wsu162e    | ILMN_2416424 | NM_146099.2    | 0.50 | 3.16E-02 |
| Ppp1r3f       | ILMN_1255926 | NM_138605.2    | 0.50 | 3.94E-02 |
| Isca1         | ILMN_2888842 | NM_026921.2    | 0.50 | 6.53E-03 |
| Son           | ILMN_2763871 | NM_019973.2    | 0.50 | 1.64E-02 |
| Gtf2ird2      | ILMN_2808186 | NM_053266.1    | 0.50 | 2.62E-02 |
| Nfs1          | ILMN_2978163 | NM_010911.1    | 0.50 | 2.70E-03 |
| Pbx3          | ILMN_2642148 | NM_016768.1    | 0.50 | 4.87E-05 |
| Siva1         | ILMN_2699003 | NM_013929.1    | 0.50 | 6.19E-03 |
| Mthfd1        | ILMN_2960407 | NM_138745.1    | 0.50 | 4.36E-03 |
| Snapc4        | ILMN_2675433 | NM_172339.2    | 0.50 | 2.74E-03 |
| Idh3a         | ILMN_2740134 | NM_029573.2    | 0.50 | 3.24E-02 |
| Ap1gbp1       | ILMN_2935734 | NM_194341.1    | 0.50 | 7.58E-03 |
| Urod          | ILMN_2453695 | NM_009478.3    | 0.50 | 1.93E-02 |
| 1110012L19Rik | ILMN_2604806 | NM_026787.1    | 0.50 | 1.13E-02 |
| Clcn3         | ILMN_2722081 | NM_007711.2    | 0.50 | 4.34E-02 |
| Kcnb1         | ILMN_2674184 | NM_008420.3    | 0.50 | 3.18E-02 |
| Dbi           | ILMN_1215469 | NM_007830.3    | 0.50 | 1.13E-02 |
| Acad9         | ILMN_1253361 | NM_172678.3    | 0.50 | 1.48E-04 |
| Adhfe1        | ILMN_2989650 | NM_175236.2    | 0.50 | 5.19E-03 |
| Tor1aip1      | ILMN_2751215 | NM_144791.1    | 0.50 | 2.49E-02 |
| Apip          | ILMN_1244908 | NM_019735.3    | 0.50 | 4.36E-02 |
| Gstm2         | ILMN_1251449 | NM_008183.2    | 0.50 | 3.35E-02 |
| Etfb          | ILMN_3104414 | NM_026695.2    | 0.50 | 9.43E-03 |
| 2610301F02Rik | ILMN_2991166 | NM_001025576.1 | 0.50 | 1.99E-02 |
| 0610007C21Rik | ILMN_3033922 | NM_027855.2    | 0.50 | 2.97E-02 |
| Slc25a15      | ILMN_2643032 | NM_181325.2    | 0.50 | 6.58E-04 |



|               |              |                |      |          |
|---------------|--------------|----------------|------|----------|
| Pitx2         | ILMN_1220244 | NM_011098.3    | 0.50 | 9.11E-03 |
| Dctn6         | ILMN_1233586 | NM_011722.2    | 0.50 | 1.61E-02 |
| Supt4h2       | ILMN_2850839 | NM_011509.1    | 0.50 | 3.61E-02 |
| 1810014F10Rik | ILMN_1251065 | NM_026928.2    | 0.49 | 4.49E-02 |
| Rock1         | ILMN_2742675 | NM_009071.2    | 0.49 | 9.77E-03 |
| Mat2b         | ILMN_2959037 | NM_134017.1    | 0.49 | 1.14E-03 |
| LOC100047837  | ILMN_1248647 | XM_001478863.1 | 0.49 | 2.46E-02 |
| Fbxo9         | ILMN_2695306 | NM_023605.2    | 0.49 | 2.74E-03 |
| Agxt2l2       | ILMN_2916008 | NM_028398.1    | 0.49 | 2.51E-02 |
| Itfg2         | ILMN_1252621 | NM_133927.1    | 0.49 | 4.15E-03 |
| Mt3           | ILMN_2764651 | NM_013603.1    | 0.49 | 1.39E-02 |
| D10Ert322e    | ILMN_2727992 | NM_026065.2    | 0.49 | 2.85E-03 |
| Vps25         | ILMN_3000008 | NM_026776.3    | 0.49 | 2.10E-03 |
| BC038156      | ILMN_2731424 | NM_177768.2    | 0.49 | 1.54E-02 |
| Aldh1l2       | ILMN_2757008 | NM_153543.1    | 0.49 | 4.03E-04 |
| Tmem65        | ILMN_2987564 | NM_175212.4    | 0.49 | 4.50E-03 |
| Retsat        | ILMN_2769680 | NM_026159.4    | 0.49 | 5.82E-03 |
| Abcb8         | ILMN_2864834 | NM_029020.2    | 0.49 | 1.61E-03 |
| Rora          | ILMN_1243741 | NM_013646.1    | 0.49 | 2.63E-02 |
| Cops4         | ILMN_2729985 | NM_012001.1    | 0.49 | 7.48E-03 |
| Aldh2         | ILMN_2733179 | NM_009656.3    | 0.49 | 2.57E-02 |
| LOC100045882  | ILMN_1246390 | XM_001475083.1 | 0.49 | 2.52E-02 |
| Sh3rf2        | ILMN_2942554 | NM_172966.1    | 0.49 | 4.60E-03 |
| Prdx3         | ILMN_2732229 | NM_007452.1    | 0.49 | 1.61E-02 |
| Tmem201       | ILMN_3068535 | NM_001025106.1 | 0.49 | 8.78E-03 |
| Dhrs7         | ILMN_2939702 | NM_025522.1    | 0.49 | 4.43E-03 |
| Alad          | ILMN_2655015 | NM_008525.3    | 0.49 | 2.63E-02 |
| Ctsc          | ILMN_1238486 | NM_009982.3    | 0.49 | 5.90E-03 |

|              |              |                |      |          |
|--------------|--------------|----------------|------|----------|
| Ccb1l        | ILMN_2986051 | NM_172404.2    | 0.49 | 1.59E-03 |
| Atp5o        | ILMN_2917540 | NM_138597.2    | 0.49 | 2.79E-02 |
| Ube2b        | ILMN_2959247 | NM_009458.2    | 0.49 | 4.61E-03 |
| Fgf9         | ILMN_2648289 | NM_013518.1    | 0.49 | 1.50E-02 |
| Pcdh7        | ILMN_2881857 | NM_018764.1    | 0.49 | 2.64E-02 |
| LOC100046320 | ILMN_1243283 | XR_032844.1    | 0.49 | 1.95E-02 |
| Mrpl18       | ILMN_2659762 | NM_026310.3    | 0.49 | 2.25E-02 |
| Hdac11       | ILMN_2614912 | NM_144919.2    | 0.49 | 2.17E-02 |
| Hdac5        | ILMN_3112922 | NM_001077696.1 | 0.49 | 1.12E-03 |
| Plxnb3       | ILMN_2759012 | NM_019587.1    | 0.48 | 3.56E-03 |
| Top1         | ILMN_1232251 | NM_009408.2    | 0.48 | 1.58E-02 |
| Nt5e         | ILMN_2636285 | NM_011851.3    | 0.48 | 2.34E-02 |
| Glt8d2       | ILMN_2836637 | NM_029102.1    | 0.48 | 9.87E-03 |
| Chpt1        | ILMN_2740149 | NM_144807.2    | 0.48 | 3.57E-02 |
| Mtrf1        | ILMN_2646556 | NM_145960.2    | 0.48 | 7.26E-03 |
| Etfdh        | ILMN_2669804 | NM_025794.1    | 0.48 | 3.94E-03 |
| Mapk1ip1     | ILMN_1224936 | NM_027115.2    | 0.48 | 3.20E-02 |
| Stard10      | ILMN_2625601 | NM_019990.4    | 0.48 | 1.14E-02 |
| Hpgd         | ILMN_2649199 | NM_008278      | 0.48 | 1.97E-02 |
| Ank3         | ILMN_1227817 | NM_170687.3    | 0.48 | 8.84E-03 |
| Nfic         | ILMN_1218384 | NM_026756.2    | 0.48 | 4.74E-02 |
| Ndufc2       | ILMN_2976591 | NM_024220.1    | 0.48 | 5.90E-03 |
| Pitpnc1      | ILMN_2705846 | NM_145823.2    | 0.48 | 4.09E-02 |
| Alox5        | ILMN_2928453 | NM_009662.2    | 0.48 | 1.68E-04 |
| Depdc6       | ILMN_3163001 | NM_145470.2    | 0.48 | 7.96E-03 |
| Wdr45l       | ILMN_1242852 | NM_025793.2    | 0.48 | 1.52E-02 |
| Magi3        | ILMN_1218573 | NM_133853.2    | 0.48 | 3.24E-02 |
| Zfyve21      | ILMN_2508745 | NM_026752.2    | 0.48 | 3.45E-02 |

|               |              |                |      |          |
|---------------|--------------|----------------|------|----------|
| 2610034E13Rik | ILMN_2612090 | NM_029365      | 0.48 | 8.99E-03 |
| Itgb3bp       | ILMN_1213858 | NM_026348.3    | 0.48 | 7.79E-04 |
| Gpsn2         | ILMN_2606579 | NM_134118.3    | 0.48 | 3.19E-02 |
| Nfs1          | ILMN_2648867 | NM_010911.1    | 0.48 | 6.64E-04 |
| Pknox2        | ILMN_3135037 | NM_001029838.1 | 0.48 | 1.77E-02 |
| Cd1d1         | ILMN_2734212 | NM_007639.2    | 0.48 | 4.36E-03 |
| Ttc33         | ILMN_2713039 | NM_026213.3    | 0.48 | 2.18E-03 |
| Ybx2          | ILMN_3086192 | NM_016875.2    | 0.48 | 8.72E-03 |
| Nmb           | ILMN_2756334 | NM_026523.2    | 0.48 | 3.27E-03 |
| Tspsy11       | ILMN_2482766 | NM_009433.2    | 0.48 | 2.31E-03 |
| Ard1          | ILMN_2744280 | NM_019870.1    | 0.48 | 1.68E-02 |
| L2hgdh        | ILMN_2999167 | NM_145443.1    | 0.47 | 8.41E-03 |
| Nme4          | ILMN_2786229 | NM_019731.1    | 0.47 | 1.23E-03 |
| Ptprd         | ILMN_3103904 | NM_001014288.2 | 0.47 | 4.89E-02 |
| Tmem33        | ILMN_1234558 | NM_030108.1    | 0.47 | 3.87E-02 |
| Gstp1         | ILMN_1223230 | NM_013541.1    | 0.47 | 5.05E-04 |
| Ebag9         | ILMN_1224670 | NM_019480.4    | 0.47 | 3.19E-04 |
| Lpar3         | ILMN_2596435 | NM_022983.3    | 0.47 | 1.04E-03 |
| Rgs7bp        | ILMN_2733314 | NM_029879.2    | 0.47 | 2.26E-02 |
| Stat5a        | ILMN_2976191 | NM_011488.2    | 0.47 | 3.73E-02 |
| Dut           | ILMN_1227159 | NM_023595.5    | 0.47 | 4.27E-03 |
| Nme4          | ILMN_1233339 | NM_019731.1    | 0.47 | 1.39E-02 |
| Spag7         | ILMN_2830771 | NM_172561.1    | 0.47 | 2.73E-02 |
| Setd6         | ILMN_2983669 | NM_001035123.1 | 0.47 | 6.87E-03 |
| 0610009O20Rik | ILMN_1213681 | NM_024179.4    | 0.47 | 3.56E-03 |
| Efcab2        | ILMN_2904339 | NM_026626.2    | 0.47 | 1.12E-02 |
| Mrps11        | ILMN_2786708 | NM_026498.1    | 0.47 | 6.19E-04 |
| Net1          | ILMN_3151722 | NM_019671.2    | 0.47 | 8.04E-03 |

|               |              |                |      |          |
|---------------|--------------|----------------|------|----------|
| Fbxo21        | ILMN_1244991 | NM_145564.3    | 0.47 | 9.09E-03 |
| Gsta3         | ILMN_3138685 | NM_010356.3    | 0.47 | 1.65E-02 |
| Acvr2b        | ILMN_1230145 | NM_007397.2    | 0.47 | 4.78E-02 |
| Igfals        | ILMN_1222609 | NM_008340.3    | 0.47 | 3.88E-02 |
| Gatad1        | ILMN_2982097 | NM_026033.1    | 0.47 | 9.68E-03 |
| Cdk2          | ILMN_1233064 | NM_183417.2    | 0.47 | 6.34E-04 |
| Snx2          | ILMN_2664491 | NM_026386      | 0.47 | 5.16E-03 |
| Camk2a        | ILMN_2596479 | NM_177407.3    | 0.47 | 2.42E-02 |
| Mtap7         | ILMN_1252545 | NM_008635.1    | 0.46 | 1.07E-02 |
| Xrcc2         | ILMN_2483748 | NM_020570.2    | 0.46 | 1.03E-03 |
| Mapk1ip1      | ILMN_3142573 | NM_001045483.1 | 0.46 | 2.09E-02 |
| Atg10         | ILMN_2667100 | NM_025770.3    | 0.46 | 7.59E-04 |
| Tmem77        | ILMN_3051608 | NM_026013.2    | 0.46 | 4.39E-03 |
| Clec3b        | ILMN_2845778 | NM_011606.1    | 0.46 | 1.14E-03 |
| 2010305C02Rik | ILMN_1249828 | NM_027249.2    | 0.46 | 1.92E-03 |
| 1700040I03Rik | ILMN_2881024 | NM_028505.1    | 0.46 | 5.12E-04 |
| Mbp           | ILMN_2737200 | NM_010777.3    | 0.46 | 3.42E-03 |
| Ggcx          | ILMN_1232184 | NM_019802.3    | 0.46 | 1.58E-02 |
| 1810049H13Rik | ILMN_2680665 | NM_025560.2    | 0.46 | 2.76E-02 |
| LOC654426     | ILMN_2876629 | NR_002690.1    | 0.46 | 6.63E-05 |
| Hdac5         | ILMN_2659160 | NM_001077696.1 | 0.46 | 1.24E-03 |
| Fzd5          | ILMN_3161263 | NM_022721.3    | 0.46 | 7.91E-03 |
| Acy1          | ILMN_2945472 | NM_025371.1    | 0.46 | 1.39E-02 |
| Retsat        | ILMN_1240471 | NM_026159.4    | 0.46 | 2.30E-02 |
| Arfrp1        | ILMN_2631745 | NM_029702.3    | 0.46 | 1.91E-03 |
| Drctnbl1a     | ILMN_2771087 | NM_053090      | 0.46 | 3.29E-02 |
| Rufy1         | ILMN_1236988 | NM_172557.2    | 0.46 | 8.62E-05 |
| Hdlbp         | ILMN_2795359 | NM_133808.2    | 0.46 | 1.47E-03 |

|         |              |                |      |          |
|---------|--------------|----------------|------|----------|
| Mobkl3  | ILMN_2776910 | NM_025283.3    | 0.46 | 9.45E-03 |
| Peci    | ILMN_2985282 | NM_011868.1    | 0.46 | 5.55E-03 |
| Tmtc1   | ILMN_2810955 | NM_198967.1    | 0.46 | 1.66E-02 |
| Spes1   | ILMN_2728320 | NM_026911.1    | 0.46 | 4.57E-03 |
| Snn     | ILMN_2790373 | NM_009223.2    | 0.46 | 1.08E-02 |
| Armet11 | ILMN_2721460 | NM_177647.4    | 0.46 | 7.91E-03 |
| Rbm38   | ILMN_1240979 | NM_019547.2    | 0.46 | 4.60E-02 |
| Cdkn2c  | ILMN_1228366 | NM_007671.2    | 0.46 | 1.14E-03 |
| Psmb7   | ILMN_1221340 | NM_011187.1    | 0.46 | 3.38E-03 |
| Cmtm8   | ILMN_1249046 | NM_027294.2    | 0.46 | 1.77E-02 |
| Bcap29  | ILMN_2866752 | NM_007530.2    | 0.45 | 7.37E-03 |
| Ocrl    | ILMN_1244077 | NM_177215.3    | 0.45 | 3.21E-03 |
| Tmem49  | ILMN_2616768 | NM_029478.3    | 0.45 | 8.52E-03 |
| Xpnpep2 | ILMN_1248998 | NM_133213.2    | 0.45 | 9.00E-05 |
| Tmem42  | ILMN_2604467 | NM_025339.3    | 0.45 | 5.67E-05 |
| Aifm2   | ILMN_1259418 | NM_153779.1    | 0.45 | 1.90E-03 |
| Mpv17   | ILMN_2626383 | NM_008622.3    | 0.45 | 4.24E-03 |
| Aldh5a1 | ILMN_2664660 | NM_172532.2    | 0.45 | 3.35E-02 |
| Ucp3    | ILMN_1233132 | NM_009464.3    | 0.45 | 1.09E-02 |
| Hint3   | ILMN_2757092 | NM_025798.3    | 0.45 | 2.33E-03 |
| Ndufb11 | ILMN_2747885 | NM_019435.2    | 0.45 | 2.21E-03 |
| Snx2    | ILMN_1254113 | NM_026386      | 0.45 | 2.68E-04 |
| Rcan2   | ILMN_3033007 | NM_207649.1    | 0.45 | 2.61E-02 |
| Hey2    | ILMN_2657210 | NM_013904.1    | 0.45 | 1.14E-02 |
| Bcap29  | ILMN_2645620 | NM_007530.2    | 0.45 | 5.29E-03 |
| Ptprd   | ILMN_2501929 | NM_001014288.2 | 0.45 | 4.27E-02 |
| Nrbp2   | ILMN_2594031 | NM_144847.1    | 0.45 | 3.74E-02 |
| Zhx3    | ILMN_2502623 | NM_177263.3    | 0.45 | 4.89E-04 |

|               |              |                |      |          |
|---------------|--------------|----------------|------|----------|
| Rgs2          | ILMN_2666622 | NM_009061      | 0.45 | 1.47E-02 |
| Ank           | ILMN_1232621 | NM_020332.3    | 0.45 | 4.52E-02 |
| LOC100045697  | ILMN_1255772 | XR_031796.1    | 0.45 | 3.16E-05 |
| Rapgef5       | ILMN_2674602 | NM_175930.4    | 0.45 | 2.78E-02 |
| Ctla4         | ILMN_2631752 | NM_009843.3    | 0.45 | 3.07E-04 |
| 1110048D14Rik | ILMN_2664522 | NM_183120.1    | 0.45 | 1.52E-03 |
| Klhl9         | ILMN_2592779 | NM_172871.2    | 0.45 | 3.48E-03 |
| Lrrc8         | ILMN_2744193 | NM_177725.2    | 0.45 | 3.74E-02 |
| Mrpl48        | ILMN_2663679 | NM_026971.2    | 0.45 | 7.25E-04 |
| Ppat          | ILMN_1245424 | XM_001002886.2 | 0.45 | 9.84E-03 |
| Klhl32        | ILMN_2987102 | NM_001033531.1 | 0.45 | 2.84E-02 |
| Dbi           | ILMN_3071356 | NM_007830.3    | 0.45 | 4.54E-05 |
| Timp3         | ILMN_2741096 | NM_011595.2    | 0.45 | 4.21E-02 |
| Timp3         | ILMN_2614759 | NM_011595.2    | 0.45 | 5.29E-03 |
| Bbs2          | ILMN_1253752 | NM_026116.2    | 0.45 | 2.14E-02 |
| 2700038C09Rik | ILMN_2590015 | NM_025598.2    | 0.45 | 8.68E-04 |
| Hey2          | ILMN_2657207 | NM_013904.1    | 0.45 | 3.22E-03 |
| Slc36a2       | ILMN_2946410 | NM_153170.1    | 0.45 | 8.12E-03 |
| 1110038D17Rik | ILMN_3000080 | NM_175133.1    | 0.45 | 8.36E-04 |
| Kcnj2         | ILMN_2875048 | NM_008425.2    | 0.45 | 1.28E-03 |
| Itga3         | ILMN_2616164 | NM_013565.2    | 0.44 | 6.29E-03 |
| Slc23a3       | ILMN_1218441 | NM_194333.3    | 0.44 | 4.79E-02 |
| Dars          | ILMN_2589477 | NM_145507.1    | 0.44 | 1.01E-02 |
| Cacna2d1      | ILMN_2752030 | NM_009784.1    | 0.44 | 8.72E-03 |
| 2310003H01Rik | ILMN_1238640 | NM_027980.1    | 0.44 | 7.98E-03 |
| Plcl2         | ILMN_1228330 | NM_013880.2    | 0.44 | 3.95E-02 |
| Tmem98        | ILMN_2827646 | NM_029537.1    | 0.44 | 7.90E-03 |
| Gm347         | ILMN_2911307 | NM_001005420.1 | 0.44 | 2.78E-02 |

|               |              |                |      |          |
|---------------|--------------|----------------|------|----------|
| 1110036O03Rik | ILMN_1231457 | NM_176830.2    | 0.44 | 1.28E-04 |
| Ola1          | ILMN_3163044 | NM_025942.2    | 0.44 | 1.81E-03 |
| Akap7         | ILMN_2944413 | NM_018747.3    | 0.44 | 3.56E-03 |
| Mrps11        | ILMN_2681946 | NM_026498.1    | 0.44 | 1.10E-03 |
| Avpr1a        | ILMN_2890935 | NM_016847.2    | 0.44 | 3.23E-02 |
| Stard7        | ILMN_2676066 | NM_139308.1    | 0.44 | 3.56E-03 |
| Hist2h2be     | ILMN_1231066 | NM_178214.3    | 0.44 | 1.19E-02 |
| Tmem9         | ILMN_1235494 | NM_025439.2    | 0.44 | 7.09E-04 |
| Arhgap26      | ILMN_1213838 | NM_175164.4    | 0.44 | 4.57E-03 |
| Mrps31        | ILMN_2732565 | NM_020560.1    | 0.43 | 2.06E-04 |
| Tpd52l1       | ILMN_2434472 | NM_009413.1    | 0.43 | 3.24E-03 |
| Rarb          | ILMN_2886828 | NM_011243.1    | 0.43 | 3.77E-02 |
| Cdkn1c        | ILMN_2708203 | NM_009876.3    | 0.43 | 4.13E-03 |
| 2700094K13Rik | ILMN_3088934 | NM_001037279.1 | 0.43 | 3.79E-04 |
| Ndufs4        | ILMN_1234521 | NM_010887.1    | 0.43 | 5.09E-05 |
| Fbxo31        | ILMN_2687032 | NM_133765.2    | 0.43 | 4.92E-02 |
| Fbxo31        | ILMN_1252057 | NM_133765.2    | 0.43 | 4.81E-02 |
| Slc45a3       | ILMN_1218226 | NM_145977.1    | 0.43 | 3.29E-02 |
| Nudt11        | ILMN_2615810 | NM_021431.2    | 0.43 | 3.32E-04 |
| Rdh14         | ILMN_2685477 | NM_023697.1    | 0.43 | 4.20E-04 |
| Msln          | ILMN_1231379 | NM_018857.1    | 0.43 | 9.33E-03 |
| Cdkn2c        | ILMN_1215651 | NM_007671.2    | 0.43 | 3.72E-04 |
| Rbed1         | ILMN_2748742 | NM_144917.4    | 0.43 | 1.07E-04 |
| Hrsp12        | ILMN_2610703 | NM_008287.2    | 0.43 | 3.35E-04 |
| Tmem57        | ILMN_2657921 | NM_025382.5    | 0.43 | 2.78E-02 |
| Cldn12        | ILMN_1242248 | NM_022890.1    | 0.43 | 2.59E-02 |
| Mbd1          | ILMN_1224291 | NM_013594.1    | 0.43 | 9.02E-03 |
| Glud1         | ILMN_3149251 | NM_008133.3    | 0.43 | 1.68E-02 |

|               |              |                |      |          |
|---------------|--------------|----------------|------|----------|
| Abca4         | ILMN_2829604 | NM_007378.1    | 0.43 | 1.57E-02 |
| Ptp4a2        | ILMN_2647282 | NM_008974.3    | 0.43 | 3.79E-03 |
| Tmem16d       | ILMN_2973774 | NM_178773.4    | 0.43 | 5.06E-03 |
| Slc38a3       | ILMN_2750089 | NM_023805.2    | 0.43 | 2.80E-02 |
| Med30         | ILMN_2616792 | NM_027212.2    | 0.43 | 1.16E-03 |
| Magix         | ILMN_2705203 | NM_018832.2    | 0.43 | 2.86E-02 |
| Mettl9        | ILMN_2713471 | NM_021554.2    | 0.43 | 5.12E-04 |
| Cep63         | ILMN_2935979 | NM_001081122.1 | 0.43 | 5.42E-04 |
| Zranb3        | ILMN_2493067 | NM_027678.2    | 0.43 | 1.88E-02 |
| Cited2        | ILMN_2905866 | NM_010828.2    | 0.43 | 5.62E-03 |
| Rab5a         | ILMN_2786764 | NM_025887.2    | 0.43 | 6.45E-03 |
| Gstm2         | ILMN_2862470 | NM_008183.2    | 0.43 | 6.20E-03 |
| Cbr2          | ILMN_2756665 | NM_007621.1    | 0.43 | 2.65E-02 |
| Rbbp7         | ILMN_2691192 | NM_009031.2    | 0.42 | 2.18E-02 |
| Ank2          | ILMN_3158444 | NM_178655.3    | 0.42 | 2.17E-02 |
| Scp2          | ILMN_1221684 | NM_011327.2    | 0.42 | 3.81E-03 |
| Tmem98        | ILMN_2658815 | NM_029537.1    | 0.42 | 3.29E-03 |
| Nsmaf         | ILMN_2688569 | NM_010945.1    | 0.42 | 5.12E-04 |
| Prkab1        | ILMN_2653081 | NM_031869.2    | 0.42 | 1.48E-02 |
| Tmem35        | ILMN_2892650 | NM_026239.2    | 0.42 | 7.79E-04 |
| Slc26a6       | ILMN_2668261 | NM_134420.3    | 0.42 | 4.89E-02 |
| Schip1        | ILMN_1244514 | NM_013928.4    | 0.42 | 8.86E-04 |
| Slc31a2       | ILMN_2634656 | NM_025286.1    | 0.42 | 2.90E-03 |
| Rwdd1         | ILMN_2642525 | NM_025614.3    | 0.42 | 1.22E-02 |
| 3110004L20Rik | ILMN_3142391 | NM_001033167.1 | 0.42 | 1.05E-02 |
| Atp5g2        | ILMN_2691528 | NM_026468.1    | 0.42 | 4.48E-03 |
| Rbbp7         | ILMN_2691187 | NM_009031.2    | 0.42 | 4.69E-02 |
| Dap3          | ILMN_2646230 | NM_022994.2    | 0.42 | 1.19E-02 |



|               |              |                |      |          |
|---------------|--------------|----------------|------|----------|
| Ssbp2         | ILMN_2693459 | NM_024186.1    | 0.42 | 1.20E-02 |
| Acot2         | ILMN_2745889 | NM_134188.2    | 0.42 | 2.02E-02 |
| Trp53inp1     | ILMN_2506012 | NM_021897.1    | 0.42 | 1.74E-02 |
| Smtnl2        | ILMN_2723293 | NM_177776.3    | 0.42 | 3.11E-02 |
| Dph3          | ILMN_3134412 | NM_001047433.1 | 0.42 | 2.50E-04 |
| Stard13       | ILMN_2745689 | NM_146258.1    | 0.42 | 6.19E-03 |
| Tmc7          | ILMN_2501267 | NM_172476.4    | 0.42 | 5.20E-03 |
| Brp44         | ILMN_2895991 | NM_027430.1    | 0.42 | 2.95E-02 |
| Rab27a        | ILMN_2614966 | NM_023635.4    | 0.42 | 2.15E-04 |
| Ctage5        | ILMN_2653619 | NM_146034.2    | 0.42 | 5.96E-04 |
| Rilpl1        | ILMN_2848163 | NM_021430.2    | 0.42 | 3.28E-04 |
| LOC100046918  | ILMN_2699167 | XM_001477065.1 | 0.42 | 1.70E-04 |
| Lrpprc        | ILMN_2845214 | NM_028233.1    | 0.41 | 3.38E-04 |
| Rsrc2         | ILMN_3111334 | NM_001005525.1 | 0.41 | 8.42E-04 |
| Rtn2          | ILMN_1250904 | NM_013648.5    | 0.41 | 3.72E-03 |
| Vps25         | ILMN_1259848 | NM_026776.3    | 0.41 | 7.77E-04 |
| Zfp579        | ILMN_1222760 | NM_026741.2    | 0.41 | 6.85E-04 |
| Acsl6         | ILMN_3125814 | NM_001033597.1 | 0.41 | 2.78E-02 |
| LOC333331     | ILMN_1256019 | XR_032458.1    | 0.41 | 3.31E-02 |
| Dhrs7         | ILMN_1213456 | NM_025522.3    | 0.41 | 6.58E-04 |
| Abhd1         | ILMN_1245678 | NR_003522.1    | 0.41 | 2.50E-04 |
| 2410129H14Rik | ILMN_1249032 | NM_175245.2    | 0.41 | 2.78E-04 |
| Sgk3          | ILMN_3108894 | NM_133220.2    | 0.41 | 3.03E-03 |
| Pex11a        | ILMN_2960982 | NM_011068.1    | 0.41 | 1.66E-03 |
| Kcnj12        | ILMN_2695900 | NM_010603.4    | 0.41 | 4.12E-03 |
| Nudt12        | ILMN_2635813 | NM_026497.2    | 0.41 | 2.99E-02 |
| BC022224      | ILMN_2746830 | NM_177564.4    | 0.41 | 2.04E-03 |
| Tirap         | ILMN_2792268 | NM_054096.1    | 0.41 | 3.05E-03 |

|              |              |                |      |          |
|--------------|--------------|----------------|------|----------|
| Arl6ip2      | ILMN_2661107 | NM_178050.3    | 0.41 | 6.26E-04 |
| Ccbl1        | ILMN_2623735 | NM_172404.2    | 0.41 | 1.08E-03 |
| Ssbp2        | ILMN_2693461 | NM_024186.1    | 0.41 | 4.50E-03 |
| Nsmaf        | ILMN_1225324 | NM_010945.1    | 0.41 | 9.79E-04 |
| Cyp2s1       | ILMN_2758264 | NM_028775.3    | 0.41 | 1.45E-02 |
| Chpt1        | ILMN_2740152 | NM_144807.2    | 0.41 | 7.87E-03 |
| Tmod4        | ILMN_2488846 | NM_016712.2    | 0.40 | 3.11E-02 |
| Gmpr         | ILMN_2602581 | NM_025508.3    | 0.40 | 1.17E-03 |
| Fntb         | ILMN_2670517 | NM_145927.2    | 0.40 | 1.56E-03 |
| Ldhd         | ILMN_2825080 | NM_027570.3    | 0.40 | 1.17E-03 |
| Ptp4a2       | ILMN_1243291 | NM_008974.2    | 0.40 | 6.94E-04 |
| Gpc3         | ILMN_2719973 | NM_016697.2    | 0.40 | 3.18E-02 |
| Dci          | ILMN_2615207 | NM_010023.3    | 0.40 | 4.13E-03 |
| Mrps31       | ILMN_2736094 | NM_020560.1    | 0.40 | 3.34E-04 |
| Lonrf1       | ILMN_3111383 | NM_001081150.1 | 0.40 | 5.85E-03 |
| Ift81        | ILMN_2634702 | NM_009879.2    | 0.40 | 4.38E-03 |
| Rps2         | ILMN_2946616 | NM_008503.2    | 0.40 | 6.14E-05 |
| Hsd17b4      | ILMN_2912239 | NM_008292.2    | 0.40 | 7.16E-04 |
| Pnpla8       | ILMN_2751653 | NM_026164.2    | 0.40 | 1.31E-02 |
| Mme          | ILMN_2863362 | NM_008604.2    | 0.40 | 1.52E-04 |
| Golm1        | ILMN_3148550 | NM_001035122.2 | 0.40 | 2.00E-04 |
| Macrodl      | ILMN_2683986 | NM_134147.3    | 0.40 | 5.28E-04 |
| Tnni3k       | ILMN_1254265 | NM_177066.4    | 0.40 | 1.20E-03 |
| Mboat5       | ILMN_2980858 | NM_145130.1    | 0.40 | 3.87E-04 |
| Folr2        | ILMN_2865285 | NM_008035.1    | 0.40 | 1.23E-02 |
| Unc13b       | ILMN_1220360 | NM_001081413.1 | 0.40 | 2.78E-02 |
| LOC100044122 | ILMN_2777879 | XM_001474594.1 | 0.40 | 1.39E-03 |
| Dlat         | ILMN_2757993 | NM_145614.3    | 0.40 | 2.25E-02 |

|               |              |                |      |          |
|---------------|--------------|----------------|------|----------|
| Pvr           | ILMN_2627296 | NM_027514.1    | 0.39 | 3.78E-03 |
| Cpeb3         | ILMN_2589525 | NM_198300.2    | 0.39 | 1.09E-02 |
| Csde1         | ILMN_2670662 | NM_144901.2    | 0.39 | 1.70E-03 |
| 2010305C02Rik | ILMN_2814385 | NM_027249.2    | 0.39 | 1.52E-05 |
| LOC100048299  | ILMN_1233187 | XM_001479961.1 | 0.39 | 7.20E-03 |
| 1700113I22Rik | ILMN_2662036 | NM_026865.2    | 0.39 | 2.98E-02 |
| Plekhf1       | ILMN_2993334 | NM_024413.1    | 0.39 | 3.97E-02 |
| Snurf         | ILMN_2748091 | NM_033174.2    | 0.39 | 6.07E-04 |
| 4732479N06Rik | ILMN_2912170 | NM_172540.1    | 0.39 | 6.91E-04 |
| March6        | ILMN_2745741 | NM_172606.2    | 0.39 | 1.93E-05 |
| Rab12         | ILMN_1232851 | NM_024448.2    | 0.39 | 3.56E-03 |
| Ppm11         | ILMN_2698757 | NM_178726.3    | 0.39 | 1.68E-02 |
| Abcc9         | ILMN_3104271 | NM_021042.2    | 0.39 | 4.80E-02 |
| Tpd52l1       | ILMN_1249224 | NM_009413.1    | 0.39 | 2.15E-03 |
| Gca           | ILMN_2688888 | NM_145523.3    | 0.39 | 1.52E-02 |
| Egln1         | ILMN_2617087 | NM_053207.1    | 0.39 | 8.56E-04 |
| Scd4          | ILMN_2653871 | NM_183216.3    | 0.39 | 2.20E-03 |
| Epb4.113      | ILMN_1244272 | NM_013813.1    | 0.39 | 1.28E-02 |
| Acp6          | ILMN_1242352 | NM_019800.3    | 0.39 | 8.51E-03 |
| Paqr7         | ILMN_1222036 | NM_027995.2    | 0.39 | 2.64E-02 |
| 3110057O12Rik | ILMN_1259606 | NM_026622.2    | 0.39 | 7.37E-03 |
| Ppp1r1b       | ILMN_2954824 | NM_144828.1    | 0.39 | 1.52E-03 |
| Pde7a         | ILMN_2604556 | NM_008802.1    | 0.39 | 7.26E-03 |
| Tcea3         | ILMN_2907214 | NM_011542.1    | 0.38 | 3.57E-03 |
| Art1          | ILMN_3161382 | NM_009710.4    | 0.38 | 1.10E-03 |
| Aqp1          | ILMN_2980663 | NM_007472.1    | 0.38 | 1.43E-02 |
| Rev1          | ILMN_2928573 | NM_019570.3    | 0.38 | 2.24E-03 |
| Abcd3         | ILMN_2925281 | NM_008991.2    | 0.38 | 2.04E-03 |

|               |              |                |      |          |
|---------------|--------------|----------------|------|----------|
| 1110057K04Rik | ILMN_2633457 | NM_172401.2    | 0.38 | 1.77E-04 |
| Egln1         | ILMN_2617086 | NM_053207.1    | 0.38 | 3.81E-03 |
| Atp10d        | ILMN_1235196 | NM_153389.2    | 0.38 | 1.61E-03 |
| Lpin1         | ILMN_3111744 | NM_172950.2    | 0.38 | 2.63E-03 |
| Khdrbs3       | ILMN_2590488 | NM_010158.2    | 0.38 | 4.35E-04 |
| Nudt7         | ILMN_3123836 | NM_024437.1    | 0.38 | 6.39E-03 |
| Eral1         | ILMN_2734969 | NM_022313.1    | 0.38 | 3.65E-04 |
| 2410091C18Rik | ILMN_2598520 | NM_028611.2    | 0.38 | 5.09E-05 |
| Igsf1         | ILMN_1258853 | NM_183336.1    | 0.38 | 1.41E-02 |
| Thnsl2        | ILMN_3147331 | NM_001033929.1 | 0.38 | 1.67E-04 |
| ORF28         | ILMN_2592571 | NM_138664.2    | 0.38 | 4.30E-04 |
| Thnsl2        | ILMN_2773485 | NM_178413.4    | 0.38 | 1.78E-04 |
| Ccng1         | ILMN_2710229 | NM_009831.2    | 0.38 | 2.65E-04 |
| Lrp4          | ILMN_1244134 | NM_172668.2    | 0.38 | 5.48E-04 |
| Gm826         | ILMN_3007971 | NM_001033411.1 | 0.38 | 2.12E-03 |
| Rarres2       | ILMN_3003130 | NM_027852.1    | 0.38 | 1.94E-03 |
| Mrpl48        | ILMN_1216122 | NM_198831.2    | 0.38 | 6.24E-05 |
| Gstk1         | ILMN_2792924 | NM_029555.2    | 0.38 | 5.19E-03 |
| Echdc2        | ILMN_2846198 | NM_026728.1    | 0.38 | 5.00E-04 |
| Reep1         | ILMN_2791644 | NM_178608.2    | 0.38 | 1.57E-03 |
| Stc2          | ILMN_2739544 | NM_011491.3    | 0.38 | 1.92E-03 |
| Snurf         | ILMN_1247894 | NM_033174.2    | 0.38 | 6.25E-03 |
| Txndc13       | ILMN_2811282 | NM_029148.1    | 0.38 | 1.65E-02 |
| Rpl3l         | ILMN_2649810 | NM_025425.3    | 0.38 | 4.05E-03 |
| Upk3b         | ILMN_2941715 | NM_175309.3    | 0.37 | 3.22E-03 |
| D830007F02Rik | ILMN_3141648 | NM_175441.3    | 0.37 | 1.36E-02 |
| Tnni2         | ILMN_2481133 | NM_009405.2    | 0.37 | 9.45E-03 |
| D830007F02Rik | ILMN_2628613 | NM_175441.2    | 0.37 | 6.66E-03 |

|              |              |                |      |          |
|--------------|--------------|----------------|------|----------|
| Apom         | ILMN_2916782 | NM_018816.1    | 0.37 | 1.64E-03 |
| Ppm1l        | ILMN_2662456 | NM_178726.3    | 0.37 | 1.32E-03 |
| Smoc1        | ILMN_1225376 | NM_022316.1    | 0.37 | 2.65E-02 |
| E2f6         | ILMN_2734152 | NM_033270.1    | 0.37 | 2.27E-04 |
| Ctf1         | ILMN_2678336 | NM_007795.1    | 0.37 | 2.38E-03 |
| Psme4        | ILMN_1230087 | NM_134013.3    | 0.37 | 5.47E-04 |
| Nqo2         | ILMN_1247930 | NM_020282.2    | 0.37 | 7.19E-05 |
| Tppp         | ILMN_2696110 | NM_182839.1    | 0.37 | 1.51E-03 |
| Dhrs7        | ILMN_2747820 | NM_025522.3    | 0.37 | 9.26E-04 |
| Rnf207       | ILMN_2823733 | NM_001033489.1 | 0.37 | 1.09E-02 |
| Prodh        | ILMN_2908406 | NM_011172.2    | 0.37 | 1.89E-02 |
| Ldhd         | ILMN_2639662 | NM_027570.3    | 0.37 | 1.40E-04 |
| Hdac4        | ILMN_1219682 | NM_207225.1    | 0.37 | 4.99E-03 |
| Chpt1        | ILMN_2740151 | NM_144807.2    | 0.37 | 3.03E-03 |
| Psme1        | ILMN_2671204 | NM_011189.1    | 0.37 | 3.31E-04 |
| LOC100047012 | ILMN_2512043 | XM_001477380.1 | 0.37 | 2.00E-04 |
| Acaa2        | ILMN_2788984 | NM_177470.2    | 0.37 | 4.89E-04 |
| Tnfaip8      | ILMN_2511953 | NM_134131.1    | 0.37 | 1.37E-02 |
| Myh11        | ILMN_2622217 | NM_013607.1    | 0.37 | 3.53E-02 |
| Klf13        | ILMN_1218206 | NM_021366.2    | 0.36 | 9.77E-03 |
| Fbxo3        | ILMN_1228298 | NM_212433.1    | 0.36 | 2.12E-03 |
| Hsd17b11     | ILMN_2642985 | NM_053262.3    | 0.36 | 1.94E-03 |
| Il1rl11      | ILMN_1214974 | NM_010744.1    | 0.36 | 1.57E-02 |
| Gal3st2      | ILMN_3042923 | NM_199366.2    | 0.36 | 3.88E-02 |
| Pdzn3        | ILMN_3156010 | NM_018884.1    | 0.36 | 3.20E-02 |
| Msrb2        | ILMN_2699556 | NM_029619.2    | 0.36 | 6.77E-05 |
| Dusp7        | ILMN_2804523 | NM_153459.2    | 0.36 | 9.07E-03 |
| Sort1        | ILMN_3005873 | NM_019972.2    | 0.36 | 1.17E-03 |

|               |              |                |      |          |
|---------------|--------------|----------------|------|----------|
| 1190003J15Rik | ILMN_2734924 | NM_029821.2    | 0.36 | 2.00E-04 |
| Nqo2          | ILMN_2968731 | NM_020282.2    | 0.36 | 5.94E-05 |
| 2900046G09Rik | ILMN_2713060 | NM_133778.2    | 0.36 | 3.37E-03 |
| Idh3g         | ILMN_1224368 | NM_008323.1    | 0.36 | 1.05E-04 |
| Pitx2         | ILMN_3118071 | NM_001042502.1 | 0.36 | 1.13E-02 |
| Rarb          | ILMN_2617194 | NM_011243.1    | 0.36 | 2.63E-04 |
| Ncapd3        | ILMN_2701851 | NM_178113.2    | 0.36 | 1.68E-04 |
| Sra1          | ILMN_2659132 | NM_025291.2    | 0.36 | 8.34E-04 |
| Pkhd111       | ILMN_3000909 | NM_138674.2    | 0.35 | 3.92E-05 |
| Actr3b        | ILMN_2933346 | NM_001004365.1 | 0.35 | 3.91E-06 |
| Fcna          | ILMN_2718589 | NM_007995.3    | 0.35 | 3.38E-03 |
| Zfp386        | ILMN_3142440 | NM_019565.3    | 0.35 | 4.66E-05 |
| Kcnh2         | ILMN_3123864 | NM_013569.1    | 0.35 | 2.09E-02 |
| Amigo2        | ILMN_2678355 | NM_178114.3    | 0.35 | 3.22E-03 |
| Selenbp2      | ILMN_2939652 | NM_019414.2    | 0.35 | 3.03E-03 |
| Aldh3a1       | ILMN_1253178 | NM_007436.1    | 0.35 | 2.63E-03 |
| Lrrc39        | ILMN_2746123 | NM_175413.2    | 0.35 | 1.32E-02 |
| A2bp1         | ILMN_1238309 | NM_021477.2    | 0.35 | 3.47E-02 |
| Cabc1         | ILMN_2800813 | NM_023341.2    | 0.35 | 5.28E-04 |
| Echdc2        | ILMN_2846194 | NM_026728.1    | 0.35 | 3.59E-04 |
| Golm1         | ILMN_2623536 | NM_027307.4    | 0.35 | 2.32E-05 |
| 1700034H14Rik | ILMN_2732877 | NM_025969.3    | 0.35 | 2.00E-04 |
| Slc25a20      | ILMN_3138499 | NM_020520.2    | 0.35 | 6.02E-04 |
| Ube2e3        | ILMN_2512042 | NM_009454.2    | 0.35 | 3.54E-04 |
| Zfp691        | ILMN_2813594 | NM_183140.1    | 0.34 | 1.82E-02 |
| Lyve1         | ILMN_2483304 | NM_053247.4    | 0.34 | 2.46E-02 |
| Mgea6         | ILMN_1259488 | NM_146034.1    | 0.34 | 1.29E-05 |
| Cux2          | ILMN_1234471 | NM_007804.2    | 0.34 | 3.78E-03 |

|          |              |                |      |          |
|----------|--------------|----------------|------|----------|
| Ucp3     | ILMN_2452102 | NM_009464.3    | 0.34 | 1.47E-02 |
| Mgst1    | ILMN_2669416 | NM_019946.4    | 0.34 | 1.47E-02 |
| Slc44a2  | ILMN_2599719 | NM_152808.2    | 0.34 | 4.98E-05 |
| Eef2k    | ILMN_2431150 | NM_007908      | 0.34 | 3.16E-03 |
| Acs11    | ILMN_2622671 | NM_007981.3    | 0.34 | 3.48E-03 |
| Mtch2    | ILMN_1229238 | NM_019758.2    | 0.34 | 3.40E-03 |
| Pxmp2    | ILMN_1219748 | NM_008993.2    | 0.34 | 1.48E-04 |
| Tarsl2   | ILMN_2749382 | NM_172310.1    | 0.34 | 7.40E-05 |
| Acsm5    | ILMN_1220520 | NM_178758.3    | 0.34 | 1.58E-02 |
| Adi1     | ILMN_3143557 | NM_134052.2    | 0.34 | 3.23E-05 |
| Fgf16    | ILMN_2629362 | NM_030614.2    | 0.34 | 5.93E-03 |
| Gzmm     | ILMN_1229500 | NM_008504.2    | 0.34 | 6.44E-03 |
| Paqr9    | ILMN_3094043 | NM_198414.2    | 0.33 | 1.91E-03 |
| Sv2a     | ILMN_1213495 | NM_022030.3    | 0.33 | 8.04E-03 |
| Sesn1    | ILMN_3059476 | NM_001013370.1 | 0.33 | 3.56E-03 |
| Ccb12    | ILMN_1256103 | NM_173763.3    | 0.33 | 7.72E-06 |
| H3f3a    | ILMN_3145213 | NM_008210.2    | 0.33 | 1.24E-04 |
| Tmod1    | ILMN_2977404 | NM_021883.1    | 0.33 | 1.44E-04 |
| Acot11   | ILMN_2799351 | NM_025590.3    | 0.33 | 2.32E-03 |
| Sort1    | ILMN_1219717 | NM_019972.2    | 0.33 | 1.80E-05 |
| Adamts14 | ILMN_2459899 | NM_144899.2    | 0.33 | 4.63E-04 |
| Ddc      | ILMN_2628647 | NM_016672      | 0.33 | 2.17E-03 |
| Sumo1    | ILMN_2632940 | NM_009460      | 0.33 | 7.97E-04 |
| Fas      | ILMN_2479290 | NM_007987.1    | 0.33 | 1.92E-03 |
| Nude     | ILMN_2962958 | NM_010948.1    | 0.33 | 9.66E-03 |
| Rbbp7    | ILMN_1219275 | NM_009031.2    | 0.33 | 1.85E-03 |
| Hbp1     | ILMN_3092415 | NM_153198.1    | 0.33 | 3.21E-03 |
| Wnt5a    | ILMN_2511913 | NM_009524.2    | 0.33 | 2.69E-03 |

|               |              |                |      |          |
|---------------|--------------|----------------|------|----------|
| 2010311D03Rik | ILMN_1241035 | NM_133839.2    | 0.33 | 1.36E-03 |
| 9330186A19Rik | ILMN_2692554 | NM_178781.2    | 0.33 | 2.75E-02 |
| Fas           | ILMN_2902979 | NM_007987.1    | 0.33 | 1.90E-02 |
| Ctsh          | ILMN_2872058 | NM_007801.1    | 0.33 | 7.28E-05 |
| Epdr1         | ILMN_1225494 | NM_134065.3    | 0.33 | 7.31E-04 |
| Rilpl1        | ILMN_2702628 | NM_021430.2    | 0.33 | 5.55E-04 |
| Upk1b         | ILMN_2936646 | NM_178924.2    | 0.32 | 1.39E-03 |
| 6030405A18Rik | ILMN_2958067 | NM_177854.2    | 0.32 | 3.54E-04 |
| 5230400G24Rik | ILMN_2732961 | NM_029409.2    | 0.32 | 6.69E-05 |
| Mat2b         | ILMN_1248381 | NM_134017.1    | 0.32 | 2.05E-03 |
| Meis2         | ILMN_2850391 | NM_010825.2    | 0.32 | 7.51E-04 |
| Tmem16k       | ILMN_1223335 | NM_133979.2    | 0.32 | 3.93E-03 |
| Spsb1         | ILMN_1224336 | NM_029035.2    | 0.32 | 3.13E-04 |
| Cobll1        | ILMN_1234199 | NM_177025.4    | 0.32 | 1.77E-03 |
| Acot11        | ILMN_1227579 | NM_025590.3    | 0.32 | 1.84E-02 |
| Atp5f1        | ILMN_2790486 | NM_009725.2    | 0.32 | 7.19E-05 |
| Hnrnpa2b1     | ILMN_2615855 | NM_182650.3    | 0.32 | 2.11E-03 |
| Amd2          | ILMN_2992239 | NM_007444.2    | 0.32 | 2.87E-03 |
| Smarca2       | ILMN_3075712 | NM_011416.2    | 0.32 | 2.69E-03 |
| Atpbd1c       | ILMN_2745005 | NM_024216.1    | 0.32 | 5.09E-05 |
| A530088H08Rik | ILMN_2901131 | NM_178656.2    | 0.32 | 1.93E-04 |
| 2400010D15Rik | ILMN_2747331 | NM_029623.1    | 0.32 | 1.63E-04 |
| LOC100047214  | ILMN_1255556 | XM_001477665.1 | 0.32 | 1.07E-03 |
| Lifr          | ILMN_2829008 | NM_013584.1    | 0.32 | 4.25E-07 |
| Palld         | ILMN_3092653 | NM_001081390.1 | 0.32 | 2.06E-04 |
| Txndc1        | ILMN_1232489 | NM_028339.1    | 0.32 | 7.16E-04 |
| Adk           | ILMN_2702471 | NM_134079.3    | 0.32 | 1.27E-04 |
| Aldob         | ILMN_2840533 | NM_144903.2    | 0.31 | 6.91E-04 |



|               |              |                |      |          |
|---------------|--------------|----------------|------|----------|
| Ift81         | ILMN_2993804 | NM_009879.2    | 0.31 | 1.30E-02 |
| Gstp1         | ILMN_2677046 | NM_013541.1    | 0.31 | 2.50E-03 |
| Mapkapk3      | ILMN_2909346 | NM_178907.1    | 0.31 | 3.56E-03 |
| Cmb1          | ILMN_2713673 | NM_181588.3    | 0.31 | 6.01E-04 |
| Rgma          | ILMN_1214500 | NM_177740.4    | 0.31 | 5.62E-03 |
| Lgmn          | ILMN_2597868 | NM_011175.2    | 0.31 | 3.03E-04 |
| EG434858      | ILMN_3013874 | NR_002883.1    | 0.31 | 3.12E-02 |
| Lrig1         | ILMN_2640862 | NM_008377.2    | 0.31 | 8.89E-04 |
| 4930572J05Rik | ILMN_3065373 | NM_198607.1    | 0.31 | 1.05E-02 |
| Tspan3        | ILMN_1232099 | NM_019793.2    | 0.31 | 8.32E-05 |
| Tbc1d10c      | ILMN_2842338 | NM_178650.3    | 0.31 | 9.33E-03 |
| Sumo1         | ILMN_2632942 | NM_009460.2    | 0.30 | 8.04E-04 |
| D930001I22Rik | ILMN_2858399 | NM_173397.2    | 0.30 | 1.17E-03 |
| Whrn          | ILMN_3082031 | NM_001008795.1 | 0.30 | 1.54E-02 |
| Car3          | ILMN_2630047 | NM_007606.3    | 0.30 | 3.98E-02 |
| Mreg          | ILMN_2976159 | NM_001005423.1 | 0.30 | 3.79E-04 |
| Bcat2         | ILMN_2794608 | NM_009737.1    | 0.30 | 2.57E-04 |
| S3-12         | ILMN_2588249 | NM_020568.2    | 0.30 | 1.55E-02 |
| Lrpprc        | ILMN_2683718 | NM_028233.2    | 0.30 | 8.28E-05 |
| Bhlhb9        | ILMN_1251595 | NM_198161.1    | 0.30 | 1.55E-04 |
| Cryba4        | ILMN_1258732 | NM_021351.1    | 0.30 | 5.85E-03 |
| Tmod4         | ILMN_2438793 | NM_016712.2    | 0.30 | 2.83E-03 |
| Slc22a5       | ILMN_2834915 | NM_011396.2    | 0.30 | 1.23E-03 |
| Slc25a34      | ILMN_3052781 | NM_001013780.1 | 0.30 | 1.76E-03 |
| Wdr21         | ILMN_2460745 | NM_030246.1    | 0.30 | 1.99E-04 |
| Cpt2          | ILMN_2885532 | NM_009949.1    | 0.30 | 2.10E-04 |
| Dusp23        | ILMN_3160863 | NM_026725.2    | 0.30 | 3.23E-04 |
| Osgepl1       | ILMN_1225723 | NM_028091.3    | 0.30 | 5.09E-05 |

|               |              |                |      |          |
|---------------|--------------|----------------|------|----------|
| Ifngr2        | ILMN_2592709 | NM_008338.2    | 0.30 | 3.22E-03 |
| Ghr           | ILMN_3138922 | NM_001048178.1 | 0.30 | 2.27E-04 |
| Bmp4          | ILMN_1215252 | NM_007554.2    | 0.30 | 3.61E-02 |
| Tmem41a       | ILMN_1244836 | NM_025693.3    | 0.30 | 3.29E-03 |
| Impa2         | ILMN_2662160 | NM_053261.2    | 0.29 | 2.31E-04 |
| Anxa11        | ILMN_3107156 | NM_013469.1    | 0.29 | 1.23E-03 |
| 1110028A07Rik | ILMN_1243516 | NM_026808.1    | 0.29 | 1.86E-03 |
| Rpl7a         | ILMN_2819841 | NM_013721.2    | 0.29 | 5.86E-03 |
| Mpst          | ILMN_2669690 | NM_138670.2    | 0.29 | 2.91E-05 |
| Herpud1       | ILMN_2790246 | NM_022331.1    | 0.29 | 1.90E-02 |
| 2310005E10Rik | ILMN_2733753 | NM_172398.3    | 0.29 | 2.01E-06 |
| Dsg2          | ILMN_1242566 | NM_007883.1    | 0.29 | 1.68E-04 |
| Rit1          | ILMN_1228359 | NM_009069.3    | 0.29 | 1.31E-02 |
| Tgfbr3        | ILMN_2606601 | NM_011578      | 0.29 | 4.08E-05 |
| Cox15         | ILMN_1235186 | NM_144874.3    | 0.29 | 3.50E-03 |
| Cacna1h       | ILMN_1246201 | NM_021415.3    | 0.29 | 4.80E-02 |
| Flvcr2        | ILMN_1248190 | NM_145447.2    | 0.29 | 6.57E-03 |
| Plp1          | ILMN_1240381 | NM_011123.2    | 0.29 | 2.05E-03 |
| Suclg1        | ILMN_1216493 | NM_019879.2    | 0.29 | 1.25E-06 |
| Tarsl2        | ILMN_1237234 | NM_172310.1    | 0.29 | 4.78E-06 |
| F13a1         | ILMN_2914938 | NM_028784.2    | 0.28 | 3.45E-02 |
| Tst           | ILMN_2493175 | NM_009437.4    | 0.28 | 9.19E-06 |
| Ppp1r9a       | ILMN_2632092 | NM_181595.3    | 0.28 | 4.99E-03 |
| Adamts7       | ILMN_2624328 | NM_001003911.2 | 0.28 | 3.97E-05 |
| Ccl11         | ILMN_2647757 | NM_011330.2    | 0.28 | 5.10E-05 |
| C2            | ILMN_2612895 | NM_013484.1    | 0.28 | 8.81E-03 |
| Cobll1        | ILMN_2782634 | NM_177025.3    | 0.28 | 1.64E-03 |
| Hsd17b11      | ILMN_2705361 | NM_053262.3    | 0.28 | 4.15E-03 |

|               |              |                |      |          |
|---------------|--------------|----------------|------|----------|
| Eif4g2        | ILMN_1213167 | NM_013507.2    | 0.28 | 4.79E-04 |
| Slc22a5       | ILMN_2834916 | NM_011396.2    | 0.28 | 4.54E-04 |
| 3632451O06Rik | ILMN_2753589 | NM_026142.1    | 0.28 | 6.31E-03 |
| Stard10       | ILMN_2759762 | NM_019990.4    | 0.28 | 4.33E-03 |
| C1qtnf4       | ILMN_1252584 | NM_026161.3    | 0.27 | 1.41E-04 |
| 0610006I08Rik | ILMN_2721178 | NM_025791.1    | 0.27 | 1.16E-03 |
| Herpud1       | ILMN_2790241 | NM_022331.1    | 0.27 | 4.27E-03 |
| Srp54         | ILMN_2852380 | NM_011899.3    | 0.27 | 4.07E-04 |
| Pim3          | ILMN_2717667 | NM_145478.1    | 0.27 | 1.77E-02 |
| Pts           | ILMN_1217378 | NM_011220.2    | 0.27 | 3.31E-05 |
| Cd59b         | ILMN_2660766 | NM_181858.1    | 0.27 | 5.95E-06 |
| As3mt         | ILMN_2707198 | NM_020577.1    | 0.27 | 4.44E-07 |
| Tmem50b       | ILMN_2671286 | NM_030018.2    | 0.27 | 4.44E-07 |
| Nt5e          | ILMN_2813830 | NM_011851.2    | 0.27 | 2.78E-02 |
| 1110018G07Rik | ILMN_2661005 | NM_178065.3    | 0.27 | 1.95E-04 |
| EG633640      | ILMN_2977390 | NM_001039244.1 | 0.27 | 1.84E-02 |
| Ctnnal1       | ILMN_1232261 | NM_018761.2    | 0.26 | 2.14E-03 |
| Sv2a          | ILMN_2702887 | NM_022030.2    | 0.26 | 3.81E-04 |
| Gpc3          | ILMN_2832979 | NM_016697.2    | 0.26 | 9.50E-04 |
| Bcl2l11       | ILMN_3157568 | NM_207680.2    | 0.26 | 5.54E-03 |
| Gpt1          | ILMN_2832524 | NM_182805.1    | 0.26 | 3.84E-03 |
| Art3          | ILMN_1223147 | NM_181728.1    | 0.26 | 6.02E-04 |
| Htra1         | ILMN_2966104 | NM_019564.1    | 0.26 | 4.61E-06 |
| Agtr1a        | ILMN_2972521 | NM_177322.2    | 0.26 | 3.81E-03 |
| Tef           | ILMN_2715400 | NM_153484.2    | 0.25 | 7.84E-06 |
| Il15          | ILMN_1219869 | NM_008357.1    | 0.25 | 5.90E-06 |
| Podn          | ILMN_1229370 | NM_172874.2    | 0.25 | 1.35E-04 |
| Nsbp1         | ILMN_2740445 | NM_016710.2    | 0.25 | 1.93E-05 |

|               |              |                |      |          |
|---------------|--------------|----------------|------|----------|
| Kcnj3         | ILMN_2714252 | NM_008426.1    | 0.25 | 1.40E-04 |
| Nhs1          | ILMN_2744492 | NM_173390.3    | 0.25 | 1.32E-04 |
| Klhdc1        | ILMN_2843019 | NM_178253.2    | 0.25 | 5.15E-06 |
| Fgf1          | ILMN_2701233 | NM_010197.3    | 0.25 | 1.96E-06 |
| Fgf13         | ILMN_2745480 | NM_010200.2    | 0.24 | 2.27E-04 |
| Lypla1        | ILMN_2678547 | NM_008866.2    | 0.24 | 3.81E-04 |
| 3110057O12Rik | ILMN_2635871 | NM_026622.2    | 0.24 | 1.28E-04 |
| Htra1         | ILMN_2746738 | NM_019564.2    | 0.24 | 1.49E-05 |
| Entpd5        | ILMN_1215096 | NM_007647.2    | 0.24 | 5.10E-05 |
| Fah           | ILMN_2614494 | NM_010176.2    | 0.24 | 1.72E-04 |
| Slc22a1       | ILMN_1248318 | NM_009202.4    | 0.24 | 1.82E-03 |
| Fgf13         | ILMN_1257196 | NM_010200.2    | 0.24 | 5.17E-05 |
| E130012A19Rik | ILMN_2963091 | NM_175332.3    | 0.24 | 8.28E-05 |
| Fndc5         | ILMN_3107467 | NM_027402.2    | 0.23 | 4.44E-05 |
| Ank2          | ILMN_2718030 | NM_001034168.1 | 0.23 | 3.16E-02 |
| Npr3          | ILMN_3127391 | NM_008728.2    | 0.23 | 8.32E-05 |
| Tmem100       | ILMN_1224014 | NM_026433.2    | 0.23 | 1.61E-02 |
| Ift81         | ILMN_2735422 | NM_009879.2    | 0.23 | 1.67E-05 |
| 2310005E10Rik | ILMN_2616422 | NM_172398.3    | 0.23 | 3.23E-05 |
| BC055107      | ILMN_2768972 | NM_183187.3    | 0.23 | 4.83E-02 |
| Pik3r1        | ILMN_2473531 | NM_001024955.1 | 0.23 | 3.83E-03 |
| Klhdc1        | ILMN_2649635 | NM_178253.2    | 0.23 | 1.21E-05 |
| Adhfe1        | ILMN_2675064 | NM_175236      | 0.23 | 4.05E-04 |
| Gstp2         | ILMN_2917386 | NM_181796.2    | 0.22 | 3.58E-07 |
| Entpd5        | ILMN_3149143 | NM_001026214.1 | 0.22 | 1.73E-03 |
| Paqr9         | ILMN_2752524 | NM_198414.2    | 0.22 | 4.01E-06 |
| Idh1          | ILMN_2729458 | NM_010497.2    | 0.22 | 4.03E-04 |
| Pik3r1        | ILMN_3114641 | NM_001077495.1 | 0.22 | 3.36E-03 |

|               |              |                |      |          |
|---------------|--------------|----------------|------|----------|
| BC031353      | ILMN_2757807 | NM_153584.1    | 0.22 | 6.89E-03 |
| Klhdc1        | ILMN_2649636 | NM_178253.4    | 0.22 | 4.81E-06 |
| Ttl1          | ILMN_1253538 | NM_178869.3    | 0.22 | 2.75E-02 |
| Ppm2c         | ILMN_3162452 | NM_001098231.1 | 0.22 | 2.01E-06 |
| Fgf1          | ILMN_2721110 | NM_010197.3    | 0.22 | 5.20E-03 |
| Slc22a1       | ILMN_1247071 | NM_009202.4    | 0.22 | 4.11E-03 |
| Pik3r1        | ILMN_3040050 | NM_001077495.1 | 0.21 | 1.65E-05 |
| Kcnd2         | ILMN_2625435 | NM_019697.3    | 0.21 | 1.63E-04 |
| Tgfbr3        | ILMN_2789239 | NM_011578.2    | 0.21 | 6.60E-04 |
| Cat           | ILMN_2826110 | NM_009804.1    | 0.21 | 6.82E-03 |
| Ddx5          | ILMN_1215167 | NM_007840.3    | 0.21 | 4.81E-06 |
| Slc25a33      | ILMN_2761046 | NM_027460.2    | 0.21 | 3.92E-03 |
| Cebpb         | ILMN_2756435 | NM_009883.3    | 0.21 | 3.32E-03 |
| LOC100044204  | ILMN_2742426 | XM_001471696.1 | 0.21 | 2.27E-04 |
| 4833426J09Rik | ILMN_3057482 | NM_001024606.1 | 0.21 | 8.84E-04 |
| Zfp809        | ILMN_2651359 | NM_172763.2    | 0.21 | 5.17E-06 |
| Car14         | ILMN_2973824 | NM_011797.1    | 0.21 | 8.42E-04 |
| Slc25a12      | ILMN_2972855 | NM_172436.2    | 0.20 | 2.51E-02 |
| Frat2         | ILMN_2824002 | NM_177603.1    | 0.20 | 9.52E-05 |
| P2ry1         | ILMN_2684316 | NM_008772.4    | 0.20 | 5.77E-03 |
| Retnla        | ILMN_1226472 | NM_020509.3    | 0.20 | 2.47E-03 |
| Usp2          | ILMN_1240264 | NM_198091.2    | 0.20 | 9.65E-04 |
| Pkig          | ILMN_2616262 | NM_011106.2    | 0.20 | 1.26E-04 |
| Gdf10         | ILMN_1249941 | NM_145741.2    | 0.20 | 3.76E-03 |
| Slc25a42      | ILMN_2810937 | NM_001007570.1 | 0.20 | 3.86E-04 |
| Gypc          | ILMN_1218358 | NM_001048207.1 | 0.19 | 9.08E-07 |
| Arrdc2        | ILMN_2693835 | NM_027560.1    | 0.19 | 4.25E-03 |
| Hmgcs2        | ILMN_1216322 | NM_008256.3    | 0.19 | 3.38E-02 |

|          |              |                |      |          |
|----------|--------------|----------------|------|----------|
| Wfdc1    | ILMN_2466164 | NM_023395.1    | 0.19 | 1.97E-03 |
| Ppm1k    | ILMN_2923615 | NM_175523.4    | 0.19 | 1.60E-03 |
| Dbt      | ILMN_2820948 | NM_010022.1    | 0.19 | 1.25E-03 |
| Zfp612   | ILMN_2491719 | NM_175480.3    | 0.19 | 3.31E-04 |
| As3mt    | ILMN_1247626 | NM_020577.2    | 0.19 | 9.08E-07 |
| Tmem82   | ILMN_2666312 | NM_145987.2    | 0.19 | 8.10E-03 |
| Gadd45a  | ILMN_2947568 | NM_007836.1    | 0.19 | 2.81E-04 |
| Mgst1    | ILMN_2940195 | NM_019946.3    | 0.18 | 1.16E-04 |
| Scara5   | ILMN_3008068 | NM_028903.1    | 0.18 | 2.70E-03 |
| Nudt4    | ILMN_1252730 | NM_027722.2    | 0.18 | 1.52E-05 |
| Whrn     | ILMN_2476329 | NM_001008792.1 | 0.18 | 2.13E-03 |
| Ramp1    | ILMN_2734391 | NM_016894.2    | 0.18 | 3.31E-04 |
| Kcnh2    | ILMN_1244402 | NM_013569.1    | 0.17 | 8.28E-05 |
| Tsc22d1  | ILMN_2723108 | NM_009366.2    | 0.17 | 1.66E-02 |
| Ccrn4l   | ILMN_1255422 | NM_009834.1    | 0.17 | 1.42E-03 |
| Art5     | ILMN_2890301 | NM_007491.1    | 0.17 | 1.15E-04 |
| Gstt1    | ILMN_2680533 | NM_008185.2    | 0.17 | 6.35E-06 |
| Cyt1l    | ILMN_2877029 | NM_001081106.1 | 0.17 | 4.69E-04 |
| Gpt2     | ILMN_1234702 | NM_173866.3    | 0.17 | 2.27E-04 |
| Lypd2    | ILMN_1248788 | NM_026671.1    | 0.17 | 1.65E-04 |
| Dgat2    | ILMN_1219915 | NM_026384.3    | 0.17 | 1.56E-05 |
| Dsg2     | ILMN_2955047 | NM_007883.1    | 0.17 | 4.49E-07 |
| Adora1   | ILMN_1254016 | NM_001008533.2 | 0.17 | 4.01E-06 |
| Prei4    | ILMN_2601884 | NM_001042671.1 | 0.17 | 7.01E-04 |
| Pdlim4   | ILMN_2606162 | NM_019417.2    | 0.17 | 7.84E-06 |
| Maob     | ILMN_2719069 | NM_172778.1    | 0.16 | 4.18E-06 |
| Usp54    | ILMN_2418324 | NM_030180.2    | 0.16 | 1.28E-04 |
| Arhgap20 | ILMN_2959729 | NM_175535.3    | 0.16 | 4.81E-06 |

|               |              |                |      |          |
|---------------|--------------|----------------|------|----------|
| Mbd1          | ILMN_2893081 | NM_013594.1    | 0.16 | 3.23E-05 |
| Aldh1l2       | ILMN_2898319 | NM_153543.1    | 0.15 | 6.35E-06 |
| Scd4          | ILMN_1259674 | NM_183216.3    | 0.15 | 2.00E-04 |
| Dpp4          | ILMN_2615096 | NM_010074.2    | 0.15 | 1.50E-05 |
| Mlf1          | ILMN_2658425 | NM_010801.1    | 0.14 | 1.38E-04 |
| Igf2          | ILMN_2597769 | NM_010514.2    | 0.14 | 2.85E-03 |
| Snai3         | ILMN_1239726 | NM_013914.2    | 0.14 | 9.38E-04 |
| 4833442J19Rik | ILMN_3160574 | NM_177101.4    | 0.14 | 3.91E-06 |
| Gpr22         | ILMN_2658266 | NM_175191.2    | 0.14 | 7.78E-03 |
| Hspd1         | ILMN_2639036 | NM_010477.3    | 0.14 | 1.16E-04 |
| Acaa2         | ILMN_2704822 | NM_177470      | 0.14 | 6.35E-06 |
| Mlf1          | ILMN_3112219 | NM_001039543.1 | 0.14 | 5.90E-06 |
| Adh1          | ILMN_1258501 | NM_007409.2    | 0.14 | 1.58E-03 |
| Gadd45a       | ILMN_2742152 | NM_007836.1    | 0.13 | 5.04E-05 |
| Ppl           | ILMN_3155363 | NM_008909.2    | 0.13 | 2.69E-03 |
| Kcnc2         | ILMN_1253791 | NM_183179.1    | 0.13 | 3.23E-05 |
| 4833426J09Rik | ILMN_3134598 | NM_001024606.1 | 0.13 | 2.31E-04 |
| Lgals4        | ILMN_2626235 | NM_010706.1    | 0.13 | 3.37E-03 |
| Hamp          | ILMN_1236304 | NM_032541.1    | 0.13 | 1.92E-03 |
| Acaa2         | ILMN_2704826 | NM_177470      | 0.13 | 6.35E-06 |
| Ii15          | ILMN_2938704 | NM_008357.1    | 0.13 | 6.82E-06 |
| Emilin2       | ILMN_2981363 | NM_145158.2    | 0.13 | 1.31E-04 |
| Rps6ka5       | ILMN_1233577 | NM_153587.2    | 0.12 | 6.17E-07 |
| Acaa2         | ILMN_2704823 | NM_177470.3    | 0.12 | 1.25E-06 |
| Rgs7          | ILMN_1237219 | NM_011880.2    | 0.12 | 4.54E-05 |
| 8230402K04Rik | ILMN_2625094 | NM_177755.3    | 0.11 | 1.65E-04 |
| Mid1ip1       | ILMN_2847332 | NM_026524.2    | 0.11 | 9.20E-04 |
| Slc40a1       | ILMN_2747923 | NM_016917.2    | 0.11 | 1.04E-05 |

|               |              |                |             |          |          |
|---------------|--------------|----------------|-------------|----------|----------|
| Slc27a1       | ILMN_2690122 | NM_011977.2    | 0.11        | 5.28E-04 |          |
| EG241041      | ILMN_2911009 | NR_002858.1    | 0.11        | 2.11E-04 |          |
| A530088H08Rik | ILMN_2601705 | NM_178656.3    | 0.11        | 4.33E-04 |          |
| Coq10b        | ILMN_3031099 | NM_001039710.1 | 0.10        | 3.73E-04 |          |
| Il15          | ILMN_2610234 | NM_008357.1    | 0.10        | 6.35E-06 |          |
| Slc46a3       | ILMN_2627733 | NM_027872.3    | 0.09        | 1.18E-04 |          |
| Prei4         | ILMN_1251682 | NM_001042672.1 | 0.09        | 2.01E-06 |          |
| Upk3b         | ILMN_2941712 | NM_175309.3    | 0.09        | 8.85E-04 |          |
| Figf          | ILMN_2680673 | NM_021716.3    | 0.08        | 4.55E-05 |          |
| Acot1         | ILMN_3062267 | NM_012006.2    | 0.08        | 4.44E-05 |          |
| Lgals4        | ILMN_2968211 | NM_010706.1    | 0.08        | 1.80E-03 |          |
| Angpt1        | ILMN_1226520 | NM_009640.3    | 0.08        | 6.35E-06 |          |
| Lamb3         | ILMN_2605512 | NM_008484.2    | 0.08        | 7.19E-05 |          |
| Fbp2          | ILMN_2634905 | NM_007994.3    | 0.07        | 1.52E-04 |          |
| Adh1          | ILMN_2850077 | NM_007409.2    | 0.07        | 1.78E-04 |          |
|               | 9.33017E+12  | ILMN_2776710   | XM_988947.1 | 0.07     | 6.35E-06 |
| Upk3b         | ILMN_2941714 | NM_175309.3    | 0.06        | 5.12E-04 |          |
| Cyp2e1        | ILMN_2687014 | NM_021282.2    | 0.06        | 1.06E-03 |          |
| Phkg1         | ILMN_2769795 | NM_011079.2    | 0.06        | 4.61E-06 |          |
| Gsta3         | ILMN_1241437 | NM_010356.3    | 0.06        | 5.90E-03 |          |
| Chac1         | ILMN_2617468 | NM_026929.3    | 0.04        | 9.35E-04 |          |
| Ces3          | ILMN_2625893 | NM_053200.2    | 0.04        | 3.77E-04 |          |
| Acot1         | ILMN_3139875 | NM_012006.2    | 0.03        | 7.25E-04 |          |
| Aqp4          | ILMN_2757232 | NM_009700.1    | 0.02        | 3.52E-07 |          |
| 2210407C18Rik | ILMN_1226767 | NM_144544.1    | 0.02        | 3.58E-07 |          |
| Mybphl        | ILMN_2689426 | NM_026831.1    | 0.02        | 2.93E-02 |          |



Animals were sham operated and treated with placebo (vehicle) or 30mg/kg/day GW0742. After 14 days the right ventricle was excised and RNA extracted from each sample. Gene expression was measured using the Illumina MouseRef-6v2 BeadChip array and data analysed using the syntax package *R* (version 2.3.1) with “Bioconductor” and “limma”. Genes that were significantly altered were calculated using a moderated *t*-test followed by Benjamini-Hochberg false discovery rate correction.

Kojonazarov, PPAR $\beta/\delta$  agonist protects the right heart – Supplemental material

**SUPPLEMENTAL TABLES**

**Supplemental Table S6. Top 5 networks in pulmonary artery banded C57BL/6 mice.**

| Associated Network functions                                                                                                 | Molecules in Network                                                                                                                                                                                                                                                                                                    | Focus Molecules | Score |
|------------------------------------------------------------------------------------------------------------------------------|-------------------------------------------------------------------------------------------------------------------------------------------------------------------------------------------------------------------------------------------------------------------------------------------------------------------------|-----------------|-------|
| <b>Cell-To-Cell Signalling and Interaction, Haematological System Development and Function, Cellular Movement</b>            | ANGPT1, CAT, CCL2, CCL21, CD74, CEBPB(includes EG:1051), CORO1A, CYP2E1, EGR1, ELK3, ERK, FGF1, FOS, FXYD5, GADD45A, GDF15, hCG,HSPD1, ICAM1, IL1, JUNB, LITAF, LMNA, Mek, MGST1, MMP2, NFkB(complex), NFKBIZ, P2RY1, PDGF BB, PHLDA1, Pkc(s), Ras, TNC, TNFRSF12A                                                      | 27              | 42    |
| <b>Cellular Movement, Cellular Growth and Proliferation, Immune Cell Trafficking</b>                                         | Akt, ANXA5, BCR, CCND2, CD3, Creb, CTGF, CYR61, DPP4, ERK1/2, ETS1, FCGR3A, Focal adhesion kinase, Hsp27, HTRA1, IGF2, IgG, IL12 (complex), IL15 (includes EG:16168), Immunoglobulin, Interferon alpha, Jnk, LAMB3, LGALS4, MAP2K1/2, MBD1, MMP14, P38 MAPK, PI3K (complex), PTN, SERPINF1, SPHK1, TGFBR3, TIMP1, WISP2 | 20              | 27    |
| <b>Tissue Development, Connective Tissue Development and Function, Skeletal and Muscular System Development and Function</b> | ADORA1, AGT, APP, CD93, CEACAM1 (includes others), CHI3L1, COL16A1, DSG2, ESR1, ESRRA, FAM102A, FRAT2, GDF10, HLA-B, KLRK1, MEOX1, mir-22, miR-21/miR-590-5p, MMP8, NUAK1, PLEKHO2, PPP1R3C, PTGS1, S100A8, SLC40A1, SMPD2, SOX9, SVEP1, TGFB2, TGFBR2, TGM2, TIMP3, TNF, USP2, WISP2                                   | 16              | 19    |
| <b>Cancer, Gastrointestinal</b>                                                                                              | C9orf3, CCNE2, CHI3L1, COL6A1, COL6A2,                                                                                                                                                                                                                                                                                  | 15              | 18    |

|                                                                                                 |                                                                                                                                                                                                                                                                                                                          |    |    |
|-------------------------------------------------------------------------------------------------|--------------------------------------------------------------------------------------------------------------------------------------------------------------------------------------------------------------------------------------------------------------------------------------------------------------------------|----|----|
| <b>Disease, Genetic Disorder</b>                                                                | COL6A3, Collagen type IV, CTGF, DUSP6, EGFR, ELK3, EMP1, ENPP1, EREG, ESM1, GPT, GSTA3, hCG, HMGCS2, IL17F, IL1B, KNG1, MAOB, NPPB, NPR3 (includes EG:18162), PDLIM4, PPARA, RXRA, S100A4, SCARB1, SPDEF, STAR, TGFB1 (includes EG:21803), TIMP1, TNC                                                                    |    |    |
| <b>Cellular Growth and Proliferation, Cardiac Stenosis, Organismal Injury and Abnormalities</b> | AGTR1, ANKRD1, B2M, Caspase 3/7, CDKN1A, COL4A1, COL4A2, CSPG4, CTSK, DDX5, ELN, ENO1, HDAC5, Histone H1, Histone h3, HNRNP, LBR (includes EG:368360), LGALS3, LGALS3BP, LIMA1, LOX, LOXL1, MHC Class I (complex), NOTCH3, Notch, P-TEFb, PRLR, RAB11FIP5, RCAN1, RNA polymerase II, RPS6, S100A11, SF3B3, ZBTB5, ZBTB7A | 14 | 16 |

Animal's pulmonary arteries were occluded or underwent a sham operation. After several days animals were orally dosed with vehicle and after 14 days the right ventricle was excised and RNA extracted from each sample. Gene expression was measured using the Illumina MouseRef-6v2 BeadChip array and data analysed using the syntax package *R* (version 2.3.1) with "Bioconductor" and "limma". Genes that were significantly modified by  $\geq 1.5$ -fold, as calculated using a moderated *t*-test followed by Benjamini-Hochberg false discovery rate correction, were imported into Ingenuity Pathway Analysis software. The table shows the top 5 networks identified from genes differentially expressed by  $\geq 1.5$ -fold in pulmonary artery banded C57BL/6 mice compared with sham-operated controls.

**Supplemental Table S7. Top bio functions in pulmonary artery banded C57BL/6 mice.**

| <b>Disease and Disorders</b>                          | <b>No of Molecules</b> | <b>p-value</b>                                 |
|-------------------------------------------------------|------------------------|------------------------------------------------|
| Cancer                                                | 106                    | $3.85 \times 10^{-14}$ - $2.49 \times 10^{-2}$ |
| Gastrointestinal Disease                              | 64                     | $6.72 \times 10^{-9}$ - $2.41 \times 10^{-2}$  |
| Reproductive System Disease                           | 70                     | $7.85 \times 10^{-7}$ - $1.28 \times 10^{-2}$  |
| Cardiovascular Disease                                | 63                     | $1.91 \times 10^{-6}$ - $2.63 \times 10^{-2}$  |
| Connective Tissue Disease                             | 43                     | $5.95 \times 10^{-6}$ - $2.33 \times 10^{-2}$  |
| <b>Molecular and Cellular Functions</b>               | <b>No of Molecules</b> | <b>p-value</b>                                 |
| Cellular Movement                                     | 51                     | $7.42 \times 10^{-11}$ - $2.60 \times 10^{-2}$ |
| Cellular Growth and Proliferation                     | 69                     | $4.66 \times 10^{-8}$ - $2.26 \times 10^{-2}$  |
| Cell Death                                            | 62                     | $3.55 \times 10^{-7}$ - $2.65 \times 10^{-2}$  |
| Cell-To-Cell Signalling and Interaction               | 39                     | $4.67 \times 10^{-6}$ - $2.28 \times 10^{-2}$  |
| Cellular Development                                  | 40                     | $7.31 \times 10^{-5}$ - $2.26 \times 10^{-2}$  |
| <b>Physiological Systems Development and Function</b> | <b>No of Molecules</b> | <b>p-value</b>                                 |
| Cardiovascular Systems Development and Function       | 23                     | $5.42 \times 10^{-9}$ - $2.01 \times 10^{-2}$  |
| Organismal Development                                | 18                     | $3.88 \times 10^{-6}$ - $1.38 \times 10^{-2}$  |
| Tissue Development                                    | 38                     | $3.35 \times 10^{-5}$ - $1.68 \times 10^{-2}$  |
| Immune Cell Trafficking                               | 19                     | $4.85 \times 10^{-5}$ - $2.60 \times 10^{-2}$  |
| Haematological System Development and Function        | 29                     | $7.18 \times 10^{-5}$ - $2.60 \times 10^{-2}$  |

Table shows the top bio functions identified from genes differentially expressed by  $\geq 1.5$ -fold in C57BL/6 mice that have been pulmonary artery banded. Animal's pulmonary arteries were occluded or underwent a sham operation. After several days animals were orally dosed with vehicle and after 14 days the right ventricle was excised and RNA extracted from each sample. Gene expression was measured using the Illumina MouseRef-6v2 BeadChip array and data

analysed using the syntax package *R* (version 2.3.1) with “Bioconductor” and “limma”. Genes that were significantly modified by  $\geq 1.5$ -fold, as calculated using a moderated *t*-test followed by Benjamini-Hochberg false discovery rate correction, were imported into Ingenuity Pathway Analysis software. The range of p-values is reflective of the range of molecules that are represented in each network.

**Supplemental Table S8. Top canonical pathways in pulmonary artery banded C57BL/6 mice.**

| Canonical Pathways                                       | Molecules in Network                                                    | p-value               | Ratio          |
|----------------------------------------------------------|-------------------------------------------------------------------------|-----------------------|----------------|
| <b>Hepatic Fibrosis/Hepatic Stellate Cell Activation</b> | AGTR1, CCL2, CCL21, CTGF, CYP2E1, FGF1, ICAM1, MMP2, MYH7, TGFB3, TIMP1 | 3.19x10 <sup>-6</sup> | 11/140 (0.079) |
| <b>Tyrosine Metabolism</b>                               | ADH1C (includes EG:11522), ADHFE1, CYP2E1, DBT, FAH, MAOB               | 3.24x10 <sup>-4</sup> | 6/67 (0.09)    |
| <b>Aryl Hydrocarbon Receptor Signalling</b>              | ALDH1L2, CCND2, CDKN1A, FOS, GSTA3, GSTT1, MGST1, TGFB3                 | 5.27x10 <sup>-4</sup> | 8/141 (0.057)  |
| <b>Bile Acid Biosynthesis</b>                            | ACAA2, ADH1C (includes EG:11522, ADHFE1, C1orf93, CYP2E1                | 5.63x10 <sup>-4</sup> | 5/49(0.102)    |
| <b>NRF2-Mediated Oxidative Stress Response</b>           | ACTA1, ACTB, CAT, FOS, GSTA3, GSTT1, JUNB, MGST1, PIK3R1                | 8.45x10 <sup>-4</sup> | 9/188 (0.048)  |

Table shows the top bio functions identified from genes differentially expressed by  $\geq 1.5$ -fold in C57BL/6 mice that have been pulmonary artery banded. Animal's pulmonary arteries were occluded or underwent a sham operation. After several days animals were orally dosed with vehicle and after 14 days the right ventricle was excised and RNA extracted from each sample. Gene expression was measured using the Illumina MouseRef-6v2 BeadChip array and data analysed using the syntax package *R* (version 2.3.1) with "Bioconductor" and "limma". Genes that were significantly modified by  $\geq 1.5$ -fold, as calculated using a moderated *t*-test followed by Benjamini-Hochberg false discovery rate correction, were imported into Ingenuity Pathway

Analysis software. The P-value for association of genes and the described canonical pathways, and the ratio of significantly differentially expressed pathway components compared to the total components in that pathway was generated using Fisher's exact test.
